# Supplementary material
Source: PubMed Central journal article supplement (PMC5408343)
Supplement: oc7b00085_si_001.pdf [file oc7b00085_si_001.pdf]

## Supplementary Information for:

# Chiral Sugars Drive Enantioenrichment in Prebiotic Amino Acid Synthesis

Alexander J. Wagner<sup>1</sup>, Dmitry Yu. Zubarev<sup>2</sup>, Alán Aspuru-Guzik<sup>2</sup>, and Donna G. Blackmond<sup>1\*</sup>

<sup>1</sup>Department of Chemistry, The Scripps Research Institute, La Jolla, CA 92037 USA

<sup>2</sup>Department of Chemistry and Chemical Biology, Harvard University, Cambridge, MA 02139 USA

### Table of Contents

|                                                                                     |    |
|-------------------------------------------------------------------------------------|----|
| 1. Experimental Procedures                                                          | 1  |
| 2. Synthesis, Spectroscopic Characterization, and Chiral Assay Results of Compounds | 4  |
| 3. Tables S.1 – S.2                                                                 | 12 |
| 4. NMR Spectra and Chiral HPLC Assays of Compounds                                  | 14 |
| 5. HPLC Assays from Reactions with Ala-I, Phe-I, and Trp-I                          | 38 |
| 6. Kinetic Modeling                                                                 | 46 |
| 7. Preliminary NMR Spectroscopy Studies                                             | 47 |
| 8. Computational Procedures and Results                                             | 53 |
| 9. References                                                                       | 63 |

## 1. Experimental Procedures

### General Experimental Details

All reactions were carried out in glassware that is not oven-dried; each reaction vial is capped under an atmosphere of air unless otherwise noted. NMR spectra were recorded at 298.0 °K on a Bruker DRX-500 at 500 MHz.  $\text{CDCl}_3$  was used as an internal reference for  $^1\text{H}$  NMR ( $\delta = 7.26$ ) and  $^{13}\text{C}$  NMR ( $\delta = 77.16$ ) spectra collected in  $\text{CDCl}_3$ .  $\text{CD}_3\text{OD}$  was used as an internal reference for  $^1\text{H}$  NMR ( $\delta = 3.31$ ) and  $^{13}\text{C}$  NMR ( $\delta = 49.00$ ) spectra collected in  $\text{CD}_3\text{OD}$ .  $\text{DMSO-}d_6$  was used as an internal reference for  $^1\text{H}$  NMR ( $\delta = 2.50$ ) and  $^{13}\text{C}$  NMR ( $\delta = 39.52$ ) spectra collected in  $\text{DMSO-}d_6$ .  $t\text{-BuOH}$  was used as an internal reference for  $^1\text{H}$  NMR ( $\delta = 1.24$ ) and  $^{13}\text{C}$  NMR ( $\delta = 30.29$ ) spectra collected in  $\text{D}_2\text{O}$ . Preparative chromatography was conducted with Analtech Uniplate thin-layer chromatography preparatory plates (UV 254, 20 × 20 cm, 1000 micron). 30 mm PTFE 0.2  $\mu\text{m}$  and 13 mm PTFE 0.45  $\mu\text{m}$  syringe filters were used for filtration of preparatory TLC and HPLC assay samples respectively. Chiral HPLC assays were conducted on an Agilent 1100 Series Liquid Chromatograph using a Chiralcel OZ-3 column (particle size: 3  $\mu\text{m}$ ; dimensions: 4.6 × 250 mm; Lot No. OZ30CE-PL009) and a Lux Amylose-1 column (particle size 5  $\mu\text{m}$ ; dimensions: 4.6 × 250 mm; S/No. H15-086884). Absolute mass information was collected on an Agilent ESI-TOF (LC/MSD TOF) by the Scripps Center for Mass Spectrometry. All starting materials, additional reagents, solvents, and deuterated solvents for NMR spectra were used without further purification.

### Chemicals

Starting Materials. Phenylacetaldehyde, acetaldehyde, L-lyxose, D-xylose, L-xylose, D-erythrose, and D-talose were purchased from Alfa Aesar. D-phenylalanine methyl ester hydrochloride (D-Phe-OMe•HCl), L-phenylalanine methyl ester hydrochloride (L-Phe-OMe•HCl), D-tryptophan methyl ester hydrochloride (D-Trp-OMe•HCl), D-alanine methyl ester hydrochloride (D-Ala-OMe•HCl), tryptophol, and D-threose were purchased from Combi-Blocks. L-tryptophan methyl ester hydrochloride (L-Trp-OMe•HCl) and L-alanine methyl ester hydrochloride (L-Ala-OMe•HCl) were purchased from Ox-Chem. D-Lyxose was purchased from Acros. D-Arabinose and L-arabinose were purchased from Calbiochem. L-Ribose was purchased from TCI. D-Allose was purchased from Chem-Impex. D-Gulose was purchased from Toronto Research Chemicals. D-Ribose, 2-deoxy-D-ribose, D-mannose, D-galactose, and D-glucose were purchased from Sigma-Aldrich.

Additional Reagents. Ammonium chloride ( $\text{NH}_4\text{Cl}$ ), sodium hydroxide (NaOH), benzoyl chloride (BzCl), triethylamine ( $\text{NEt}_3$ ), and zinc (II) iodide ( $\text{ZnI}_2$ ) were purchased from Acros. 7 N ammonia in methanol was purchased from Sigma-Aldrich. 2-Iodoxybenzoic acid (IBX) and trimethylsilyl cyanide (TMSCN) were purchased from Matrix Scientific. Potassium cyanide (KCN) was purchased from Alfa Aesar. Magnesium Sulfate ( $\text{MgSO}_4$ ) was purchased from EMD.

Solvents. Ammonium hydroxide ( $\text{NH}_4\text{OH}$ ) was purchased from Electron Microscopy Sciences. Purifications were conducted with ethyl acetate (EtOAc) and dichloromethane ( $\text{CH}_2\text{Cl}_2$ ) purchased from Macron, HPLC grade methanol ( $\text{CH}_3\text{OH}$ ) purchased from VWR, and hexanes purchased from Fisher. Aqueous reaction solutions for studies of aminonitriles with sugars were prepared with HPLC grade water purchased from VWR. *tert*-Butanol (*t*-BuOH) was purchased from Sigma-Aldrich. Chiral assays were conducted with HPLC grade hexanes and HPLC grade *iso*-propanol (*i*-PrOH) that were purchased from Fisher.

Deuterated Solvents for NMR Spectra. Chloroform (CDCl<sub>3</sub>), methanol (CD<sub>3</sub>OD), dimethylsulfoxide (DMSO-*d*<sub>6</sub>), and water (D<sub>2</sub>O) were purchased from Cambridge Isotope Laboratories.

### **General Reaction Procedure for Sugar-Mediated Reaction of AM-I to AM-II**

All reactions were carried out according to this general procedure unless otherwise noted. To a 1 dram vial with a stirbar was added AM-I (0.250 mmol) and sugar (0.500 mmol). When the sugar is a solid, the sugar was massed on weigh paper and then added to AM-I in the 1 dram vial. When the sugar is a liquid, the sugar was massed in the 1 dram vial and AM-I was massed on weigh paper and added right before addition of water as solvent.

Reaction progress was initiated with the addition of 0.25 M NaOH in H<sub>2</sub>O (1.000 mL) via micropipette and the reaction was stirred at room temperature for a given period of time. The solution of 0.25 M NaOH in H<sub>2</sub>O was prepared in a 50 mL volumetric flask with NaOH (500.3 mg, 12.51 mmol) and H<sub>2</sub>O. Temperature was measured via thermometer in an independent 1 dram vial containing H<sub>2</sub>O open to air. The recorded temperature ranged between 22 and 24 °C.

In order to assess enantiomeric enrichment of AM-II at a given period of time, a derivatization protocol was developed to halt reaction progress, convert AM-II to Bz-AM-II, and isolate purified Bz-AM-II. At the time for a given enantiomeric enrichment measurement, the entire reaction vessel was treated with the following protocol: *i*-PrOH (1.000 mL) was added, followed immediately by benzoyl chloride (52 µL, 0.45 mmol) and triethylamine (55 µL, 0.40 mmol). The stirred solution was transferred to a 20 mL scintillation vial, which contained *i*-PrOH (3.0 mL) and solid MgSO<sub>4</sub>. The 1 dram vial was washed with *i*-PrOH (1.0 mL) and CH<sub>2</sub>Cl<sub>2</sub> (2.0 mL). The resulting solution was agitated, treated with an additional portion of solid MgSO<sub>4</sub> to ensure removal of water, agitated again, filtered (rinsing with CH<sub>2</sub>Cl<sub>2</sub>), and concentrated under reduced pressure to give the crude reaction mixture. *i*-PrOH (0.5 mL) and CH<sub>2</sub>Cl<sub>2</sub> (0.5 mL) were added and the mixture was sonicated to ensure solvation. The solution was purified by preparatory TLC (Bz-Ala-II: 10% MeOH/CH<sub>2</sub>Cl<sub>2</sub>; Bz-Phe-II: 4% MeOH/CH<sub>2</sub>Cl<sub>2</sub> run twice; Bz-Trp-II: 10% MeOH/CH<sub>2</sub>Cl<sub>2</sub>). The Bz-AM-II was recovered after analysis of the plate by UV (254 nm), removal of the silica pertaining to the Bz-AM-II UV band into a 20 mL scintillation vial, addition of methanol (8.0 mL), sonication, filtration, and concentration under reduced pressure. Chiral HPLC samples were filtered before analysis.

Reaction Procedures for Table 1, Table 2, and Table S.2. Independent AM-I reactions with D-ribose, D-lyxose, D-xylose, D-arabinose, and D-deoxyribose in Table 1 were conducted according to the general procedure. Bz-Ala-II e.e. data with D-ribose and D-lyxose independently are both averages of two trials. Bz-Phe-II e.e. data with D-ribose is an average of three trials. Isolated yields for reactions in Table 1 are included in Table S.1.

D-ribose/D-lyxose mixture reactions were conducted according to the general procedure with the following modification: To a 1 dram vial with a stirbar was added AM-I (0.250 mmol), D-ribose (0.250 mmol), and D-lyxose (0.250 mmol).

D-ribose/D-lyxose/D-xylose/D-arabinose mixture reactions were conducted according to the general procedure with the following modification: To a 1 dram vial with a stirbar was added

AM-I (0.250 mmol), D-ribose (0.250 mmol), D-lyxose (0.250 mmol), D-xylose (0.250 mmol), and D-arabinose (0.250 mmol).

Reactions of Phe-I with L-aldopentoses and with C4 and C6 aldose sugars were carried out according to the general procedure and results are included in Tables 2 and S.2 respectively.

Reaction Procedures for Figure 1 Data. Reactions were conducted according to the general procedure with Phe-I and D-ribose. Independent reactions were conducted for each entry with *i*-PrOH (1.0 mL) and CH<sub>2</sub>Cl<sub>2</sub> (1.0 mL) were added and the crude reaction mixture was sonicated to ensure solvation. A portion (100. μL) was removed for analysis via HPLC to assess conversion and the remainder was purified by preparatory TLC (4% MeOH/CH<sub>2</sub>Cl<sub>2</sub>; run twice). When both Bz-Phe-I and Bz-Phe-II are present, reaction conversion is calculated as the integrated peak values of Bz-Phe-II<sub>R+S</sub>/(Bz-Phe-I<sub>R+S</sub> +Bz-Phe-II<sub>R+S</sub>) and is uncalibrated. Experimental data is summarized in Figure 1. The kinetic model used in Figure 2 is summarized in Figures S.33-S.34.

Reaction Procedures for Table 3 Data. Reactions were conducted according to the general procedure with Phe-I and D-ribose. Entries were halted at t = 24 h. Results are given in Table 3.

Reaction Procedures for Table 4 Data. Reactions were conducted according to the general procedure with Phe-I and D-ribose. Independent reactions were conducted for each entry at room temperature and at 37 °C in an oil bath. The solvent for Entries 1 and 2 is HPLC grade H<sub>2</sub>O. The solvent for Entries 3 and 4 is a solution of 1.0 x 10<sup>-4</sup> M NaOH in H<sub>2</sub>O. This solution was prepared as follows: 0.25 M NaOH (1.0 mL) was added to a 25 mL volumetric flask and filled with H<sub>2</sub>O, generating a solution of 1.0 x 10<sup>-2</sup> M NaOH. 1.0 x 10<sup>-2</sup> M NaOH (250. μL) was added to a 25 mL volumetric flask and filled with H<sub>2</sub>O, generating a solution of 1.0 x 10<sup>-4</sup> M NaOH in H<sub>2</sub>O. Results are given in Table 4.

Procedures for NMR Studies in Figures S.35-S.40. To an NMR spectroscopy tube was added Phe-I (36.5 mg, 0.250 mmol) and D-ribose (75.1 mg, 0.500 mmol). Reaction progress was initiated with the addition of 0.25 M NaOH in D<sub>2</sub>O (1.000 mL) via micropipette. The solution of 0.25 M NaOH in D<sub>2</sub>O was prepared in a 10 mL volumetric flask. NaOH (100.1 mg, 2.503 mmol) was massed in the volumetric flask followed by the addition of D<sub>2</sub>O (4.0 mL). *tert*-Butanol (47.8 μL, 0.500 mmol) was added to the volumetric flask, which was then filled to the line with D<sub>2</sub>O in order to generate a solution of 0.25 M NaOH and 0.05 M *t*-BuOH in D<sub>2</sub>O. The reaction was sonicated for 3 min to assist in mixing and inverted several times. The reaction was monitored via NMR spectroscopy. Averaged time points for spectra are included. Reactions were set up with an identical protocol to record experiments at the same time points. Results are given in Figures S.35-S.40.

## 2. Synthesis, Spectroscopic Characterization, and Chiral Assays of Compounds

Reactions are not optimized for yield, but for providing sufficient quantities of material for the desired uses associated with each compound.  $^1\text{H}$  NMR spectra,  $^{13}\text{C}$  NMR spectra, and chiral HPLC data are included in Figures S.1-S.24. In the main text, aminonitrile or amino amide compounds denoted with (L) or (D) correspond to the stereogenic center found in the L- or D-amino acid. A designation of L corresponds to the *S* stereogenic center and a designation of D corresponds to the *R* stereogenic center for the compounds studied.

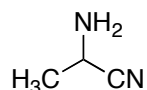

**2-aminopropanenitrile (Ala-I).**<sup>1</sup> To a round bottom flask with stirbar was added TMSCN (4.68 mL, 37.4 mmol) and acetaldehyde (1.68 mL, 29.9 mmol). The mixture was stirred vigorously and cooled to 0 °C via ice bath.  $\text{ZnI}_2$  (95.7 mg, 0.300 mmol) was added. The solution was stirred for 10 min at 0 °C, warmed to room temperature, and stirred for 15 min. 7 N  $\text{NH}_3$  in MeOH (23.1 mL) was added and the reaction was stirred at 40 °C for 3 h. The reaction mixture was concentrated under reduced pressure and purified by column chromatography (19:1  $\text{CH}_2\text{Cl}_2/i\text{-PrOH}$ ) to give the product as a yellow oil (1.4741 g, 21.032 mmol, 70% yield);  $^1\text{H}$  NMR (500 MHz,  $\text{CDCl}_3$ )  $\delta$  3.78 (q,  $J = 7.0$  Hz, 1H), 1.64 (brs, 2H), 1.48 (d,  $J = 7.0$  Hz, 3H);  $^{13}\text{C}$  NMR (125 MHz,  $\text{CDCl}_3$ )  $\delta$  122.9, 38.6, 21.7; HRMS (ESI-TOF,  $\text{CH}_3\text{OH}$ )  $m/z$  calcd for  $\text{C}_3\text{H}_6\text{N}_2$  ( $\text{M}+\text{H}$ )<sup>+</sup> 71.0604, found 71.0604.

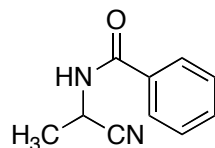

***N*-(1-cyanoethyl)benzamide (Bz-Ala-I).** To a 20 mL scintillation vial was added 2-aminopropanenitrile (21.2 mg, 0.302 mmol) and  $\text{CH}_2\text{Cl}_2$  (0.60 mL). Benzoyl chloride (38.7  $\mu\text{L}$ , 0.333 mmol) and triethylamine (50.5  $\mu\text{L}$ , 0.362 mmol) were added. The reaction mixture was stirred for 1 h, concentrated under reduced pressure, and purified by column chromatography (19:1  $\text{CH}_2\text{Cl}_2/\text{CH}_3\text{OH}$ ) and to give the product as a white solid (21.3 mg, 0.122 mmol, 40% yield);  $^1\text{H}$  NMR (500 MHz,  $\text{CDCl}_3$ )  $\delta$  7.78 (d,  $J = 7.5$  Hz, 2H), 7.54 (t,  $J = 7.5$  Hz, 1H), 7.44 (t,  $J = 7.5$  Hz, 2H), 6.74 (d,  $J = 7.5$  Hz, 1H), 5.14 (quint,  $J = 7.0$  Hz, 1H), 1.65 (d,  $J = 7.5$  Hz, 3H);  $^{13}\text{C}$  NMR (125 MHz,  $\text{CDCl}_3$ )  $\delta$  166.8, 132.8, 132.5, 128.9, 127.3, 119.5, 36.5, 19.6; HRMS (ESI-TOF,  $\text{CH}_3\text{OH}$ )  $m/z$  calcd for  $\text{C}_{10}\text{H}_{10}\text{N}_2\text{O}$  ( $\text{M}+\text{H}$ )<sup>+</sup> 175.0866, found 175.0867; Chiral HPLC (Lux Amylose-1, 5% *i*-PrOH in hexanes, 1.0 mL/min, UV detection at 254 nm  $t_1 = 15.4$  min,  $t_2 = 17.7$  min).

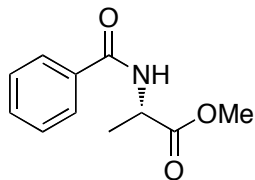

**(S)-methyl 2-benzamidopropanoate (S-Bz-Ala-OMe).** To an oven-dried round-bottom flask with a stirbar was added L-Ala-OMe•HCl (1.0005 g, 7.1679 mmol). CH<sub>2</sub>Cl<sub>2</sub> (28 mL) was added and the mixture was stirred at room temperature. Triethylamine (2.20 mL, 15.8 mmol) was added, precipitating the ammonium salt, and the solution was stirred for 5 min. The reaction mixture was cooled to 0 °C via ice bath and benzoyl chloride (0.91 mL, 7.9 mmol) was added dropwise. The solution was stirred at 0 °C for 30 min, warmed to room temperature, and stirred overnight. H<sub>2</sub>O (15 mL) was added and the mixture was extracted with CH<sub>2</sub>Cl<sub>2</sub> (2 × 30 mL). The organic layers were combined, dried (MgSO<sub>4</sub>), filtered, concentrated under reduced pressure, and purified by column chromatography (1:1 hexanes/EtOAc) to give the product as a clear oil (1.0616 g, 5.1228 mmol, 71% yield); <sup>1</sup>H NMR (500 MHz, CDCl<sub>3</sub>) δ 7.80-7.78 (m, 2H), 7.50-7.47 (m, 1H), 7.43-7.40 (m, 2H), 6.83 (d, *J* = 6.0 Hz, 1H), 4.79 (quint, *J* = 7.0 Hz, 1H), 3.77 (s, 3H), 1.50 (d, *J* = 7.5 Hz, 3H); <sup>13</sup>C NMR (125 MHz, CDCl<sub>3</sub>) δ 173.8, 166.9, 134.0, 131.8, 128.6, 127.1, 52.6, 48.6, 18.7; HRMS (ESI-TOF, CH<sub>3</sub>OH) *m/z* calcd for C<sub>11</sub>H<sub>13</sub>NO<sub>3</sub> (M+H)<sup>+</sup> 208.0968, found 208.0970.

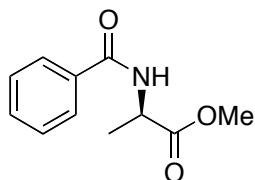

**(R)-methyl 2-benzamidopropanoate (R-Bz-Ala-OMe).** To an oven-dried round-bottom flask with a stirbar was added D-Ala-OMe•HCl (1.0005 g, 7.1679 mmol). CH<sub>2</sub>Cl<sub>2</sub> (28 mL) was added and the mixture was stirred at room temperature. Triethylamine (2.20 mL, 15.8 mmol) was added, precipitating the ammonium salt, and the solution was stirred for 5 min. The reaction mixture was cooled to 0 °C via ice bath and benzoyl chloride (0.91 mL, 7.9 mmol) was added dropwise. The solution was stirred at 0 °C for 30 min, warmed to room temperature, and stirred overnight. H<sub>2</sub>O (15 mL) was added and the mixture was extracted with CH<sub>2</sub>Cl<sub>2</sub> (2 × 30 mL). The organic layers were combined, dried (MgSO<sub>4</sub>), filtered, concentrated under reduced pressure, and purified by column chromatography (1:1 hexanes/EtOAc) to give the product as a clear oil (1.4216 g, 6.8600 mmol, 96% yield); <sup>1</sup>H and <sup>13</sup>C NMR spectral data matched the reported data for the *S*-enantiomer.

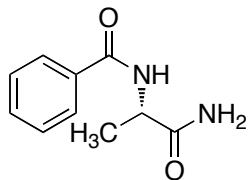

**(S)-N-(1-amino-1-oxopropan-2-yl)benzamide (S-Bz-Ala-II).** To a round bottom flask with a stirbar was added (*S*)-methyl 2-benzamidopropanoate (987.9 mg, 4.767 mmol). 7 N NH<sub>3</sub> in MeOH (2.38 mL) was added and the reaction was stirred at room temperature for 24 h. The reaction mixture was concentrated under reduced pressure and purified by column chromatography (9:1 CH<sub>2</sub>Cl<sub>2</sub>/CH<sub>3</sub>OH) to give the product as a white solid (201.0 mg, 1.046 mmol, 22% yield); <sup>1</sup>H NMR (500 MHz, DMSO-*d*<sub>6</sub>) δ 8.39 (d, *J* = 7.5 Hz, 1H), 7.89 (d, *J* = 7.5 Hz, 2H), 7.46 (t, *J* = 7.5 Hz, 2H), 7.36 (brs, 1H), 6.98 (brs, 1H), 4.42 (quint, *J* = 7.0 Hz, 1H), 1.33 (d, *J* = 7.0 Hz, 3H); <sup>13</sup>C NMR (125 MHz, DMSO-*d*<sub>6</sub>) δ 174.4, 165.9, 134.2, 131.2, 128.1, 127.4, 48.7, 18.0; HRMS (ESI-TOF, CH<sub>3</sub>OH) *m/z* calcd for C<sub>10</sub>H<sub>12</sub>N<sub>2</sub>O<sub>2</sub> (M+H)<sup>+</sup> 193.0971, found 193.0971; Chiral HPLC (Chiralcel OZ-3, 20% *i*-PrOH in hexanes, 1.0 mL/min, UV detection at 254 nm, t<sub>s</sub> = 11.9 min, t<sub>R</sub> = 18.3 min) 99% e.e.

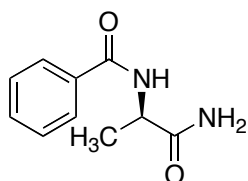

**(R)-N-(1-amino-1-oxopropan-2-yl)benzamide (R-Bz-Ala-II).** To a round bottom flask with a stirbar was added (*S*)-methyl 2-benzamidopropanoate (1.3485 g, 6.5073 mmol). 7 N NH<sub>3</sub> in MeOH (3.25 mL) was added and the reaction was stirred at room temperature for 24 h. The reaction mixture was concentrated under reduced pressure and purified by column chromatography (9:1 CH<sub>2</sub>Cl<sub>2</sub>/CH<sub>3</sub>OH) to give the product as a white solid (251.4 mg, 1.308 mmol, 22% yield); <sup>1</sup>H and <sup>13</sup>C NMR spectral data matched the reported data for the *S*-enantiomer. Chiral HPLC (Chiralcel OZ-3, 20% *i*-PrOH in hexanes, 1.0 mL/min, UV detection at 254 nm, t<sub>s</sub> = 12.4 min, t<sub>R</sub> = 17.4 min) 99% e.e.

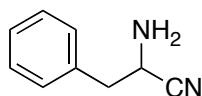

**2-amino-3-phenylpropanenitrile (Phe-I).**<sup>2</sup> To a round-bottom flask with a stirbar was added KCN (6.8365 g, 104.98 mmol) and NH<sub>4</sub>Cl (9.0140 g, 168.51 mmol). NH<sub>4</sub>OH (92 mL) was added and the solution was stirred 10 min at room temperature. Phenylacetaldehyde (10.0 mL, 85.5 mmol; in 40. mL *i*-PrOH) was added dropwise over 20 min. The solution was stirred at room temperature for 16 h. The reaction mixture was extracted with CH<sub>2</sub>Cl<sub>2</sub> (3 × 100 mL). The organic layers were combined, dried (MgSO<sub>4</sub>), filtered, and concentrated under reduced pressure to give the crude reaction mixture as a yellow oil. The mixture was purified by column chromatography (1:1 hexanes/EtOAc) to afford the product as a yellow oil that solidified in the freezer to give a yellow solid (5.0383 g, 34.464 mmol, 40% yield); <sup>1</sup>H NMR (500 MHz, CDCl<sub>3</sub>) δ 7.38-7.35 (m,

2H), 7.33-7.29 (m, 3H), 3.94 (t,  $J = 6.5$  Hz, 1H), 3.03 (dd,  $J = 6.5, 2.0$  Hz, 2H), 1.61 (brs, 2H);  $^{13}\text{C}$  NMR (125 MHz,  $\text{CDCl}_3$ )  $\delta$  135.0, 129.7, 129.0, 127.8, 121.6, 44.7, 41.3; HRMS (ESI-TOF,  $\text{CH}_3\text{OH}$ )  $m/z$  calcd for  $\text{C}_9\text{H}_{10}\text{N}_2$  ( $\text{M}+\text{H}$ ) $^+$  147.0917, found 147.0915.

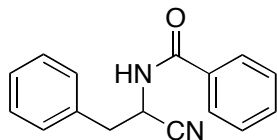

***N*-(1-cyano-2-phenylethyl)benzamide (Bz-Phe-I).** To a round-bottom flask with a stirbar was added 2-2-amino-3-phenylpropanenitrile (100.0 mg, 0.6840 mmol).  $\text{CH}_2\text{Cl}_2$  (3 mL) and *i*-PrOH (3 mL) were added, followed by benzoyl chloride (116  $\mu\text{L}$ , 0.999 mmol) and triethylamine (139  $\mu\text{L}$ , 0.997 mmol). The solution was stirred 10 min and then concentrated under reduced pressure. The reaction mixture was purified via trituration ( $\text{CH}_2\text{Cl}_2$ ) to give the product as a white solid (127.1 mg, 0.5078 mmol, 74% yield);  $^1\text{H}$  NMR (500 MHz,  $\text{CD}_3\text{OD}$ )  $\delta$  7.77 (d,  $J = 7.5$  Hz, 2H), 7.55 (t,  $J = 7.5$  Hz, 1H), 7.46 (t,  $J = 7.5$  Hz, 2H), 7.35-7.31 (m, 4H), 7.29-7.25 (m, 1H), 5.20 (t,  $J = 8.0$  Hz, 1H), 3.25 (ddd,  $J = 21.5, 14.0, 8.0$  Hz, 2H);  $^{13}\text{C}$  NMR (125 MHz,  $\text{CD}_3\text{OD}$ )  $\delta$  169.6, 136.6, 134.4, 133.3, 130.5, 129.7, 129.6, 128.5, 128.5, 119.5, 43.8, 39.4; HRMS (ESI-TOF,  $\text{CH}_3\text{OH}$ )  $m/z$  calcd for  $\text{C}_{16}\text{H}_{14}\text{N}_2\text{O}$  ( $\text{M}+\text{H}$ ) $^+$  251.1179, found 251.1182; Chiral HPLC (Chiralcel OZ-3, 20% *i*-PrOH in hexanes, 1.0 mL/min, UV detection at 254 nm  $t_1 = 6.6$  min,  $t_2 = 7.4$  min); (Chiralcel OZ-3, 5% *i*-PrOH in hexanes, 1.0 mL/min, UV detection at 254 nm,  $t_1 = 20.7$  min,  $t_2 = 25.3$  min).

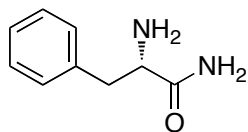

**(*S*)-2-amino-3-phenylpropanamide (S-Phe-II).** To an oven-dried round-bottom flask with a stirbar was added L-Phe-OMe $\cdot$ HCl (1.0140 g, 4.7014 mmol). 7 N  $\text{NH}_3$  in MeOH (18 mL) was added and the reaction was stirred at 50  $^\circ\text{C}$  for 3 d. The reaction mixture was concentrated under reduced pressure and purified by column chromatography (9:1  $\text{CH}_2\text{Cl}_2/\text{CH}_3\text{OH}$ ) to give the product as a white solid (274.6 mg, 1.672 mmol, 36% yield);  $^1\text{H}$  NMR (500 MHz,  $\text{DMSO}-d_6$ )  $\delta$  7.30-7.27 (m, 3H), 7.22-7.17 (m, 3H), 6.94 (s, 1H), 3.33 (dd,  $J = 8.5, 5.0$  Hz, 1H), 2.91 (dd,  $J = 13.5, 5.0$  Hz, 1H), 2.59 (dd,  $J = 13.5, 8.5$  Hz, 1H), 1.62 (s, 2H);  $^{13}\text{C}$  NMR (125 MHz,  $\text{DMSO}-d_6$ )  $\delta$  176.6, 138.9, 129.3, 128.0, 126.0, 56.2, 41.2; HRMS (ESI-TOF,  $\text{CH}_3\text{OH}$ )  $m/z$  calcd for  $\text{C}_9\text{H}_{12}\text{N}_2\text{O}$  ( $\text{M}+\text{H}$ ) $^+$  165.1022, found 165.1023.

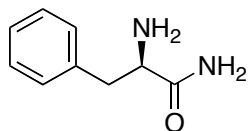

**(*R*)-2-amino-3-phenylpropanamide (R-Phe-II).** To an oven-dried round-bottom flask with a stirbar was added D-Phe-OMe $\cdot$ HCl (1.0022 g, 4.6467 mmol). 7 N  $\text{NH}_3$  in MeOH (18 mL) was added and the reaction was stirred at 50  $^\circ\text{C}$  for 3 d. The reaction mixture was concentrated under



reduced pressure and purified by column chromatography (9:1 CH<sub>2</sub>Cl<sub>2</sub>/CH<sub>3</sub>OH) to give the product as a white solid (297.3 mg, 1.811 mmol, 39% yield); <sup>1</sup>H and <sup>13</sup>C NMR spectral data matched the reported data for the *S*-enantiomer.

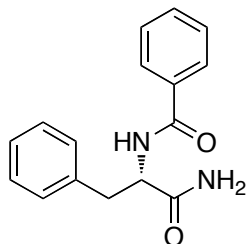

**(*S*)-*N*-(1-amino-1-oxo-3-phenylpropan-2-yl)benzamide (*S*-Bz-Phe-II).** To a 1 dram vial with a stirbar was added (*S*)-2-amino-3-phenylpropanamide (18.3 mg, 0.111 mmol). CH<sub>3</sub>OH (0.500 mL) was added, followed by benzoyl chloride (19 μL, 0.16 mmol) and triethylamine (23 μL, 0.17 mmol). The solution was stirred 10 min and then concentrated under reduced pressure. The reaction mixture was purified by column chromatography (9:1 CH<sub>2</sub>Cl<sub>2</sub>/CH<sub>3</sub>OH) to give the product as a white solid (20.1 mg, 0.0749 mmol, 67% yield); <sup>1</sup>H NMR (500 MHz, CD<sub>3</sub>OD) δ 7.72-7.71 (m, 2H), 7.51 (t, *J* = 7.5 Hz, 1H), 7.42 (t, *J* = 7.5 Hz, 2H), 7.31-7.25 (m, 4H), 7.19 (d, *J* = 7.0 Hz, 1H), 4.84 (t, 1H), 3.27 (dd, *J* = 14.0, 6.0 Hz, 1H), 3.05 (dd, *J* = 14.0, 9.0 Hz, 1H); <sup>13</sup>C NMR (125 MHz, CD<sub>3</sub>OD) δ 176.3, 170.1, 138.7, 135.3, 132.8, 130.3, 129.5, 129.4, 128.4, 127.8, 56.3, 38.9; HRMS (ESI-TOF, CH<sub>3</sub>OH) *m/z* calcd for C<sub>16</sub>H<sub>16</sub>N<sub>2</sub>O<sub>2</sub> (M+H)<sup>+</sup> 269.1284, found 269.1283; Chiral HPLC (Chiralcel OZ-3, 20% *i*-PrOH in hexanes, 1.0 mL/min, UV detection at 254 nm, t<sub>s</sub> = 14.2 min) >99% e.e.

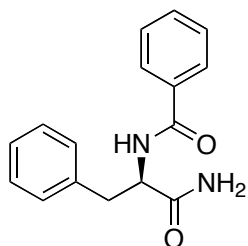

**(*R*)-*N*-(1-amino-1-oxo-3-phenylpropan-2-yl)benzamide (*R*-Bz-Phe-II).** To a 1 dram vial with a stirbar was added (*R*)-2-amino-3-phenylpropanamide (19.0 mg, 0.116 mmol). CH<sub>3</sub>OH (0.500 mL) was added, followed by benzoyl chloride (20. μL, 0.17 mmol) and triethylamine (24 μL, 0.17 mmol). The solution was stirred 10 min and then concentrated under reduced pressure. The reaction mixture was purified by column chromatography (9:1 CH<sub>2</sub>Cl<sub>2</sub>/CH<sub>3</sub>OH) to give the product as a white solid (18.3 mg, 0.0682 mmol, 59% yield); <sup>1</sup>H and <sup>13</sup>C NMR spectral data matched the reported data for the *S*-enantiomer; Chiral HPLC (Chiralcel OZ-3, 20% *i*-PrOH in hexanes, 1.0 mL/min, UV detection at 254 nm, t<sub>s</sub> = 14.6 min, t<sub>R</sub> = 42.7 min) 98% e.e.

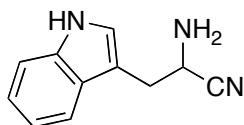

**2-amino-3-(1*H*-indol-3-yl)propanenitrile (Trp-I).**<sup>1,3</sup> To an oven-dried round-bottom flask with a stirbar was added tryptophol (5.0179 g, 31.128 mmol) and 2-iodoxybenzoic acid (9.5550 g, 34.123 mmol). DMSO (125 mL) was added and the reaction was stirred at room temperature for 2 h. The reaction mixture was filtered, and H<sub>2</sub>O (240 mL) was added. The solution was extracted with Et<sub>2</sub>O (3 × 300. mL). The organic layers were combined, dried (MgSO<sub>4</sub>), filtered, and concentrated under reduced pressure to give the unpurified aldehyde 2-(1*H*-indol-3-yl)acetaldehyde as an oil. The oil was immediately carried on to the next step. To the oil in a round-bottom flask with a stirbar was added TMSCN (4.85 mL, 38.8 mmol). ZnI<sub>2</sub> (509.0 mg, 1.595 mmol) was then added and the reaction mixture was stirred at room temperature for 20 min. 7 N NH<sub>3</sub> in MeOH (23.3 mL) was added and the flask was transferred to an oil bath at 40 °C and stirred for 8 h. The solution was concentrated under reduced pressure to afford a dark brown oil. The reaction mixture was purified via trituration (CH<sub>2</sub>Cl<sub>2</sub>) to afford the desired product as a tan solid (1.0431 g, 5.6314 mmol, 18% yield). <sup>1</sup>H NMR (500 MHz, CD<sub>3</sub>OD) δ 7.59 (d, *J* = 8.0 Hz, 1H), 7.36 (d, *J* = 8.5 Hz, 1H), 7.22 (s, 1H), 7.11 (t, *J* = 7.0 Hz, 1H), 7.03 (t, *J* = 7.5 Hz, 1H), 4.04 (t, *J* = 7.0 Hz, 1H), 3.27 (d, *J* = 7.0 Hz, 2H); <sup>13</sup>C NMR (125 MHz, CD<sub>3</sub>OD) δ 138.1, 128.6, 125.0, 123.1, 122.6, 120.0, 119.2, 112.4, 109.8, 45.7, 32.2; HRMS (ESI-TOF, CH<sub>3</sub>OH) *m/z* calcd for C<sub>11</sub>H<sub>11</sub>N<sub>3</sub> (M+H)<sup>+</sup> 186.1026, found 186.1026.

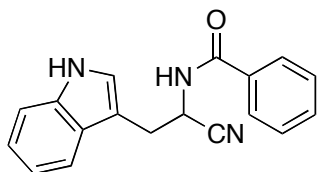

***N*-(1-cyano-2-(1*H*-indol-3-yl)ethyl)benzamide (Bz-Trp-I).** To a 1 dram vial with a stirbar was added 2-amino-3-(1*H*-indol-3-yl)propanenitrile (29.8 mg, 0.161 mmol). CH<sub>3</sub>OH (1.0 mL) was added, followed by benzoyl chloride (28 μL, 0.24 mmol) and triethylamine (34 μL, 0.24 mmol). The solution was stirred 10 min and then concentrated under reduced pressure. The reaction mixture was purified by column chromatography (19:1 CH<sub>2</sub>Cl<sub>2</sub>/CH<sub>3</sub>OH) to give the product as an off-white solid (30.6 mg, 0.106 mmol, 66% yield). <sup>1</sup>H NMR (500 MHz, CD<sub>3</sub>OD) δ 7.78-7.77 (m, 2H), 7.64 (d, *J* = 8.0 Hz, 1H), 7.55 (t, *J* = 7.5 Hz, 1H), 7.45 (t, *J* = 7.5 Hz, 2H), 7.36 (d, *J* = 8.0 Hz, 1H), 7.24 (s, 1H), 7.11 (t, *J* = 7.0 Hz, 1H), 7.03 (t, *J* = 7.5 Hz, 1H), 5.27 (t, *J* = 7.5 Hz, 1H), 3.42 (dddd, *J* = 14.5, 14.5, 14.5, 8.0 Hz, 2H); <sup>13</sup>C NMR (125 MHz, CD<sub>3</sub>OD) δ 169.7, 138.1, 134.5, 133.2, 129.6, 128.5, 128.5, 125.0, 122.7, 120.1, 120.0, 119.1, 112.5, 109.5, 43.7, 29.9; HRMS (ESI-TOF, CH<sub>3</sub>OH) *m/z* calcd for C<sub>18</sub>H<sub>15</sub>N<sub>3</sub>O (M+H)<sup>+</sup> 290.1288, found 290.1290; Chiral HPLC (Chiralcel OZ-3, 20% i-PrOH in hexanes, 1.0 mL/min, UV detection at 254 nm, *t*<sub>1</sub> = 10.4 min, *t*<sub>2</sub> = 11.8 min).

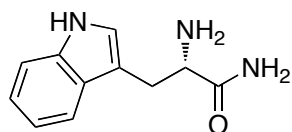

**(S)-2-amino-3-(1*H*-indol-3-yl)propanamide (S-Trp-II).** To an oven-dried round-bottom flask with a stirbar was added L-Trp-OMe•HCl (1.0047 g, 3.9444 mmol). 7 N NH<sub>3</sub> in MeOH (12 mL) was added and the reaction was stirred at 50 °C for 3 d. The reaction mixture was concentrated under reduced pressure and purified by column chromatography (1:1 CH<sub>2</sub>Cl<sub>2</sub>/CH<sub>3</sub>OH) to give the desired product as a yellow oil (254.3 mg, 1.251 mmol, 32% yield); <sup>1</sup>H NMR (500 MHz, DMSO-*d*<sub>6</sub>) δ 10.83 (s, 1H), 7.58 (d, *J* = 8.0 Hz, 1H), 7.34-7.32 (m, 2H), 7.16 (d, *J* = 2.5 Hz, 1H), 7.06 (t, *J* = 8.0 Hz, 1H), 6.97 (t, *J* = 8.0 Hz, 1H), 6.94 (brs, 1H), 3.40 (dd, *J* = 8.5, 5.0 Hz, 1H), 3.06 (dd, *J* = 14.0, 4.5 Hz, 1H), 2.72 (dd, *J* = 14.0, 8.0 Hz, 1H), 1.66 (brs, 2H); <sup>13</sup>C NMR (125 MHz, DMSO-*d*<sub>6</sub>) δ 177.1, 136.2, 127.4, 123.6, 120.8, 118.5, 118.2, 111.3, 110.9, 55.3, 31.2; HRMS (ESI-TOF, CH<sub>3</sub>OH) *m/z* calcd for C<sub>11</sub>H<sub>13</sub>N<sub>3</sub>O (M+H)<sup>+</sup> 204.1131, found 204.1131.

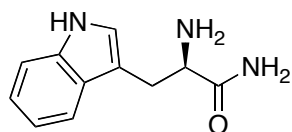

**(R)-2-amino-3-(1*H*-indol-3-yl)propanamide (R-Trp-II).** To an oven-dried round-bottom flask with a stirbar was added D-Trp-OMe•HCl (1.0002 g, 3.9268 mmol). 7 N NH<sub>3</sub> in MeOH (12 mL) was added and the reaction was stirred at 50 °C for 3 d. The reaction mixture was concentrated under reduced pressure and purified by column chromatography (1:1 CH<sub>2</sub>Cl<sub>2</sub>/CH<sub>3</sub>OH) to give the desired product as a yellow oil (267.1 mg, 1.314 mmol, 33% yield); <sup>1</sup>H and <sup>13</sup>C NMR spectral data matched the reported data for the *S*-enantiomer.

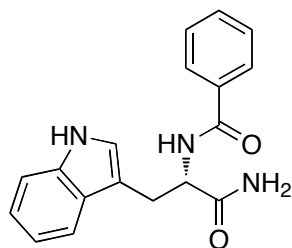

**(S)-N-(1-amino-3-(1*H*-indol-3-yl)-1-oxopropan-2-yl)benzamide (S-Bz-Trp-II).** To a 1 dram vial with a stirbar was added (*S*)-2-amino-3-(1*H*-indol-3-yl)propanamide (17.7 mg, 0.0871 mmol). CH<sub>3</sub>OH (0.500 mL) was added, followed by benzoyl chloride (15 μL, 0.13 mmol) and triethylamine (18 μL, 0.13 mmol). The solution was stirred 10 min and then concentrated under reduced pressure. The reaction mixture was purified by column chromatography (9:1 CH<sub>2</sub>Cl<sub>2</sub>/CH<sub>3</sub>OH) to give the product as a solid (15.1 mg, 0.0491 mmol, 56% yield). <sup>1</sup>H NMR (500 MHz, CDCl<sub>3</sub>) δ 8.24 (brs, 1H), 7.80 (d, *J* = 7.5 Hz, 1H), 7.71 (d, *J* = 7.0 Hz, 2H), 7.49 (t, *J* = 7.5 Hz, 1H), 7.40-7.36 (m, 3H), 7.21 (t, *J* = 7.0 Hz, 1H), 7.15-7.13 (m, 2H), 7.05 (d, *J* = 7.0 Hz, 1H), 5.92 (brs, 1H), 5.56 (brs, 1H), 4.99 (ddd, *J* = 7.5, 7.5, 5.5 Hz, 1H), 3.48 (dd, *J* = 14.5, 5.0 Hz, 1H), 3.26 (dd, *J* = 14.5, 8.0 Hz, 1H); <sup>13</sup>C NMR (125 MHz, CD<sub>3</sub>OD) δ 173.7, 167.4, 136.4, 133.7, 132.0, 128.7, 127.5, 127.2, 123.4, 122.6, 120.1, 119.1, 111.5, 110.8, 41.1, 28.4;

HRMS (ESI-TOF, CH<sub>3</sub>OH)  $m/z$  calcd for C<sub>18</sub>H<sub>17</sub>N<sub>3</sub>O<sub>2</sub> (M+H)<sup>+</sup> 308.1393, found 308.1396; Chiral HPLC (Chiralcel OZ-3, 20% *i*-PrOH in hexanes, 1.0 mL/min, UV detection at 254 nm,  $t_S$  = 24.3 min,  $t_R$  = 32.7 min) 98% e.e.

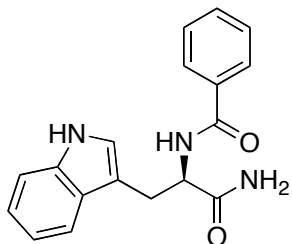

**(*R*)-*N*-(1-amino-3-(1*H*-indol-3-yl)-1-oxopropan-2-yl)benzamide (*R*-Bz-Trp-II).** To a 1 dram vial with a stirbar was added (*R*)-2-amino-3-(1*H*-indol-3-yl)propanamide (12.5 mg, 0.0615 mmol). CH<sub>3</sub>OH (0.500 mL) was added, followed by benzoyl chloride (11  $\mu$ L, 0.095 mmol) and triethylamine (13  $\mu$ L, 0.093 mmol). The solution was stirred 10 min and then concentrated under reduced pressure. The reaction mixture was purified by column chromatography (9:1 CH<sub>2</sub>Cl<sub>2</sub>/CH<sub>3</sub>OH) to give the product as a solid (11.3 mg, 0.0368 mmol, 60% yield). <sup>1</sup>H and <sup>13</sup>C NMR spectral data matched the reported data for the *S*-enantiomer. Chiral HPLC (Chiralcel OZ-3, 20% *i*-PrOH in hexanes, 1.0 mL/min, UV detection at 254 nm,  $t_S$  = 25.2 min,  $t_R$  = 31.2 min) 99% e.e.

### 3. Tables S.1 – S.2

**Table S.1. Isolated yields for reactions in Table 1**

| Entry | AM-I  | Sugar                                  | Isolated Yield (%) |
|-------|-------|----------------------------------------|--------------------|
| 1     | Ala-I | D-ribose                               | 12                 |
| 2     | Ala-I | D-lyxose                               | 13                 |
| 3     | Ala-I | D-xylose                               | 9                  |
| 4     | Ala-I | D-arabinose                            | 11                 |
| 5     | Ala-I | D-deoxyribose                          | 13                 |
| 6     | Ala-I | D-ribose/D-lyxose                      | 6                  |
| 7     | Ala-I | D-ribose/D-lyxose/D-xylose/D-arabinose | 7                  |
| 8     | Phe-I | D-ribose                               | 12                 |
| 9     | Phe-I | D-lyxose                               | 14                 |
| 10    | Phe-I | D-xylose                               | 13                 |
| 11    | Phe-I | D-arabinose                            | 17                 |
| 12    | Phe-I | D-deoxyribose                          | 12                 |
| 13    | Phe-I | D-ribose/D-lyxose                      | 10                 |
| 14    | Phe-I | D-ribose/D-lyxose/D-xylose/D-arabinose | 9                  |
| 15    | Trp-I | D-ribose                               | 23                 |
| 16    | Trp-I | D-lyxose                               | 20                 |
| 17    | Trp-I | D-xylose                               | 22                 |
| 18    | Trp-I | D-arabinose                            | 28                 |
| 19    | Trp-I | D-deoxyribose                          | 17                 |
| 20    | Trp-I | D-ribose/D-lyxose                      | 17                 |
| 21    | Trp-I | D-ribose/D-lyxose/D-xylose/D-arabinose | 17                 |
| 22    | Phe-I | L-ribose                               | 9                  |
| 23    | Phe-I | L-lyxose                               | 14                 |
| 24    | Phe-I | L-xylose                               | 14                 |
| 25    | Phe-I | L-arabinose                            | 16                 |
| 26    | Phe-I | control (no sugar)                     | 12                 |

**Table S.2. Reaction of Table 1 with Phe-I and C4 and C6 aldose sugars (7 d)**

| Sugar                                                                                         | Phe-II ee (%) | Isolated Yield (%) |
|-----------------------------------------------------------------------------------------------|---------------|--------------------|
| D-erythrose 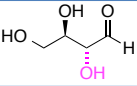 | 3 (D)         | 14                 |
| D-threose    | 4 (L)         | 16                 |
| D-allose     | 19 (D)        | 17                 |
| D-glucose    | 6 (D)         | 16                 |
| D-mannose    | 52 (L)        | 13                 |
| D-gulose     | 28 (D)        | 13                 |
| D-galactose  | 26 (D)        | 17                 |
| D-talose    | 72 (L)        | 13                 |

#### 4. NMR Spectra and Chiral HPLC Assays of Compounds

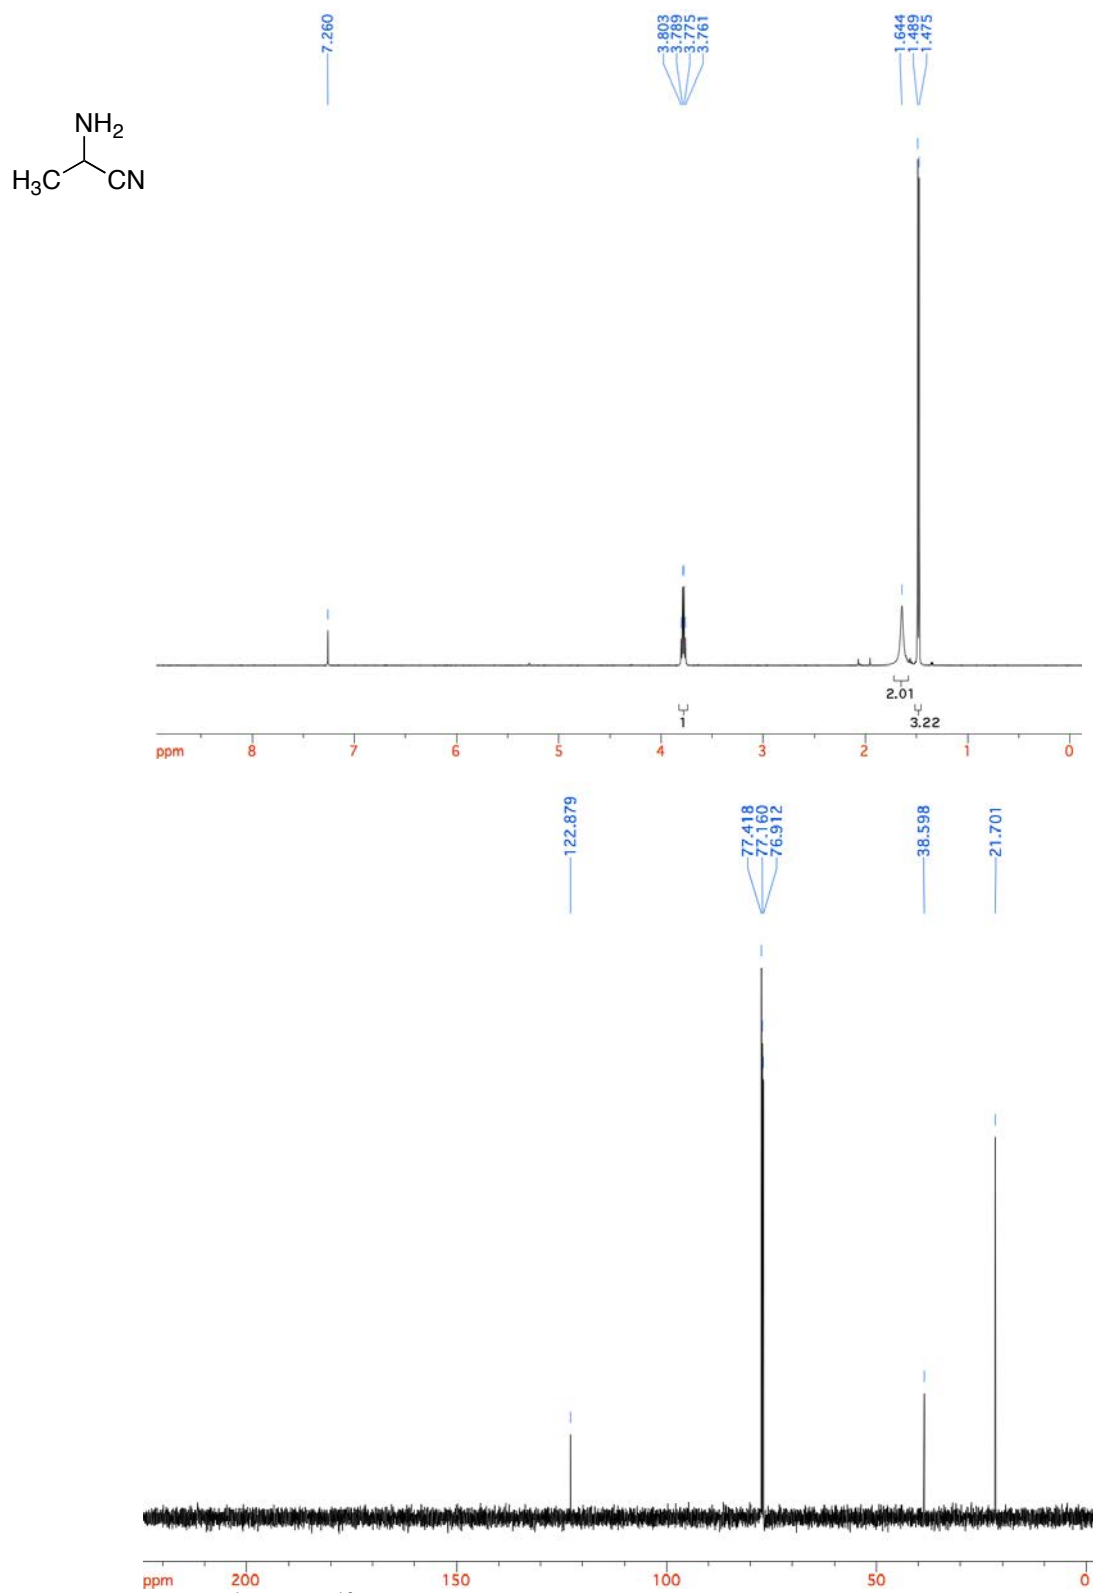

Figure S.1. Ala-I  $^1\text{H}$  and  $^{13}\text{C}$  NMR Spectra

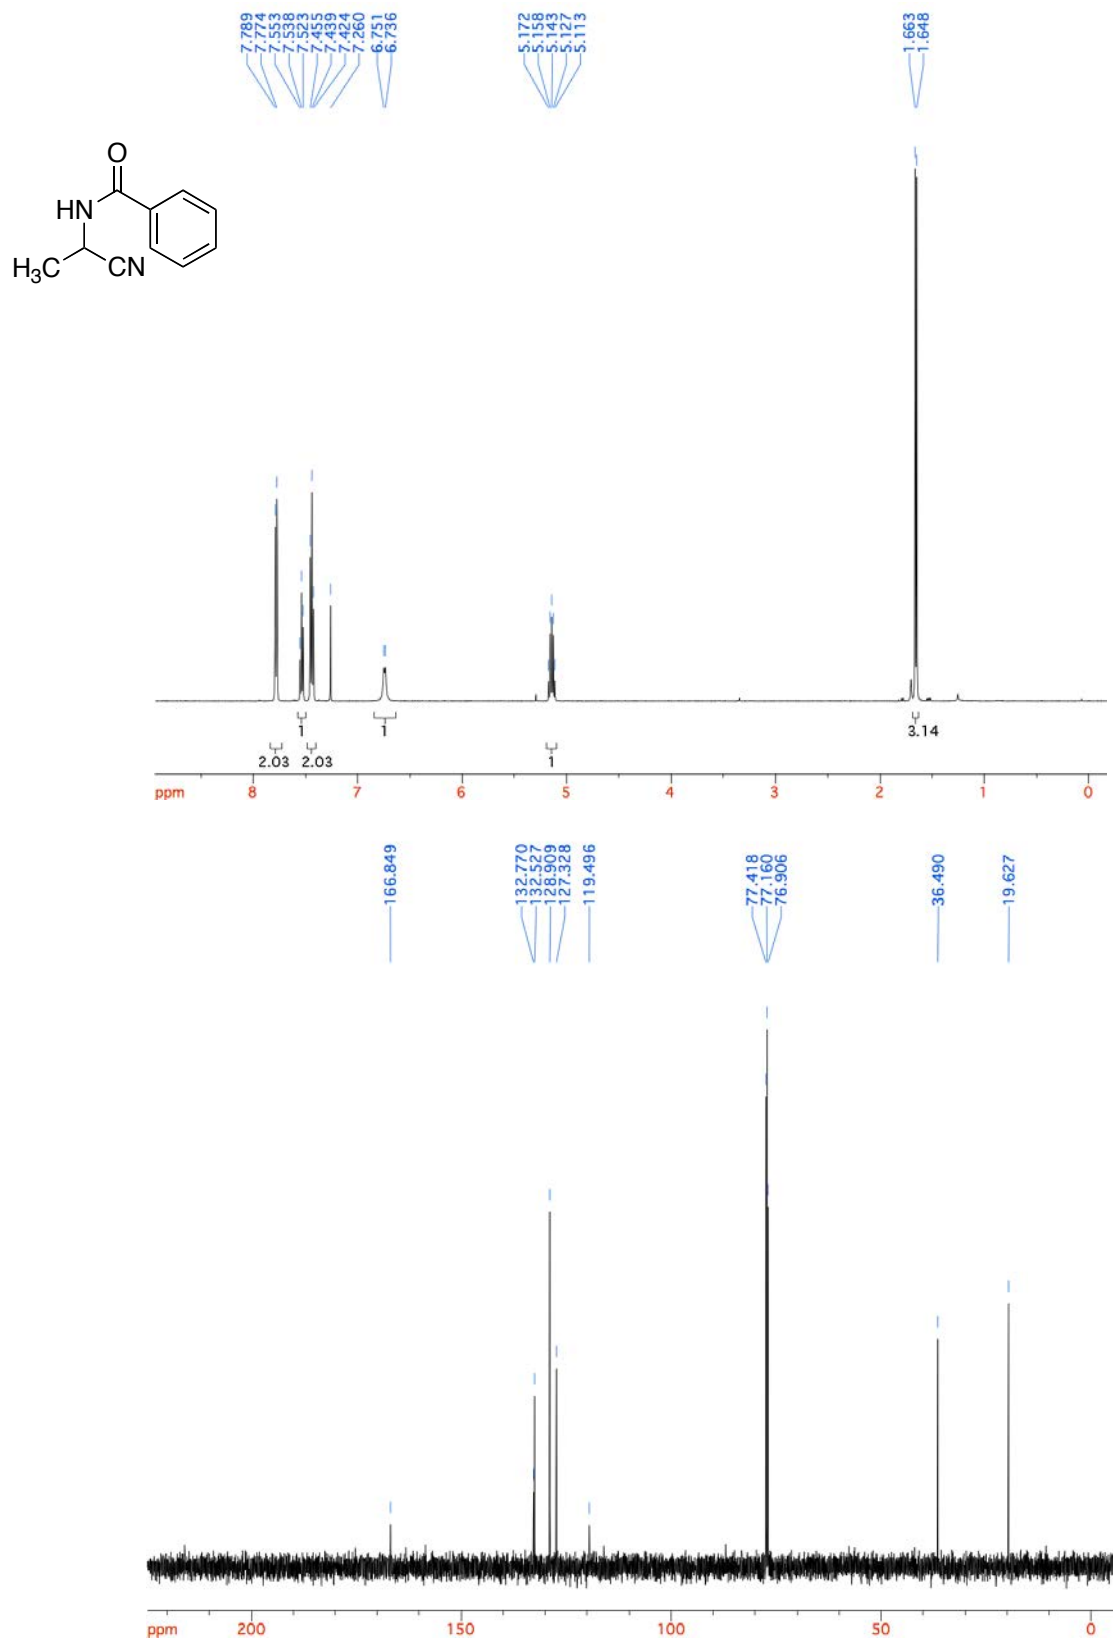

Figure S.2. Bz-Ala-I  $^1\text{H}$  and  $^{13}\text{C}$  NMR Spectra



Data File C:\CHEM32\ALEX\1-AMINOAMIDES\1-32-ANB-LUX1-95-5-2.D  
 Sample Name: 1-32-ANB-lux1-95-5-2

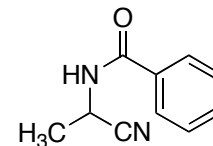

```

=====
Acq. Operator   : Alex                               Seq. Line :    5
Acq. Instrument : LC-MS                             Location  : Vial 4
Injection Date  : 3/31/2016 8:55:41 PM             Inj       :    1
                                                    Inj Volume: 10 µl

Acq. Method     : C:\CHEM32\1\METHODS\C0L2_HI_95_5_40MIN.M
Last changed    : 3/31/2016 8:54:40 PM by Alex
                  (modified after loading)

Analysis Method : C:\CHEM32\1\METHODS\C0L1_HI_95_5_40MIN.M
Last changed    : 4/9/2016 4:35:47 PM by Alex
                  (modified after loading)
=====
  
```

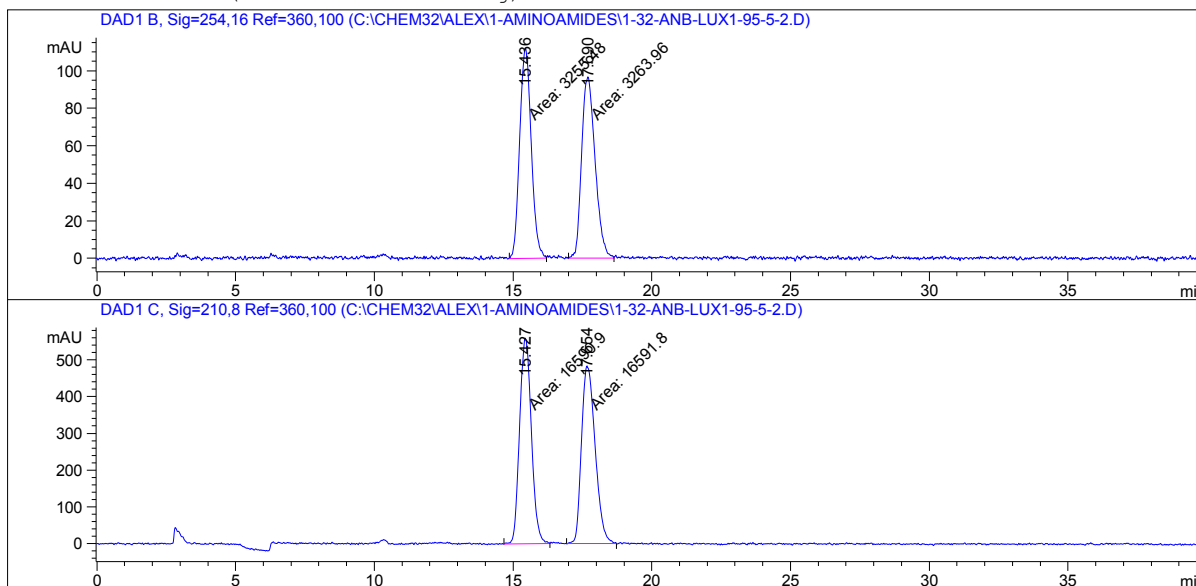

Area Percent Report

```

=====
Sorted By      :      Signal
Multiplier     :      1.0000
Dilution       :      1.0000
Use Multiplier & Dilution Factor with ISTDs
=====
  
```

Signal 1: DAD1 B, Sig=254,16 Ref=360,100

| Peak # | RetTime [min] | Type | Width [min] | Area [mAU*s] | Height [mAU] | Area %  |
|--------|---------------|------|-------------|--------------|--------------|---------|
| 1      | 15.436        | MM   | 0.4842      | 3255.48169   | 112.04666    | 49.9349 |
| 2      | 17.690        | MM   | 0.5626      | 3263.96387   | 96.68620     | 50.0651 |

Totals :                                    6519.44556    208.73286

**Figure S.3. Bz-Ala I Chiral HPLC Assay**

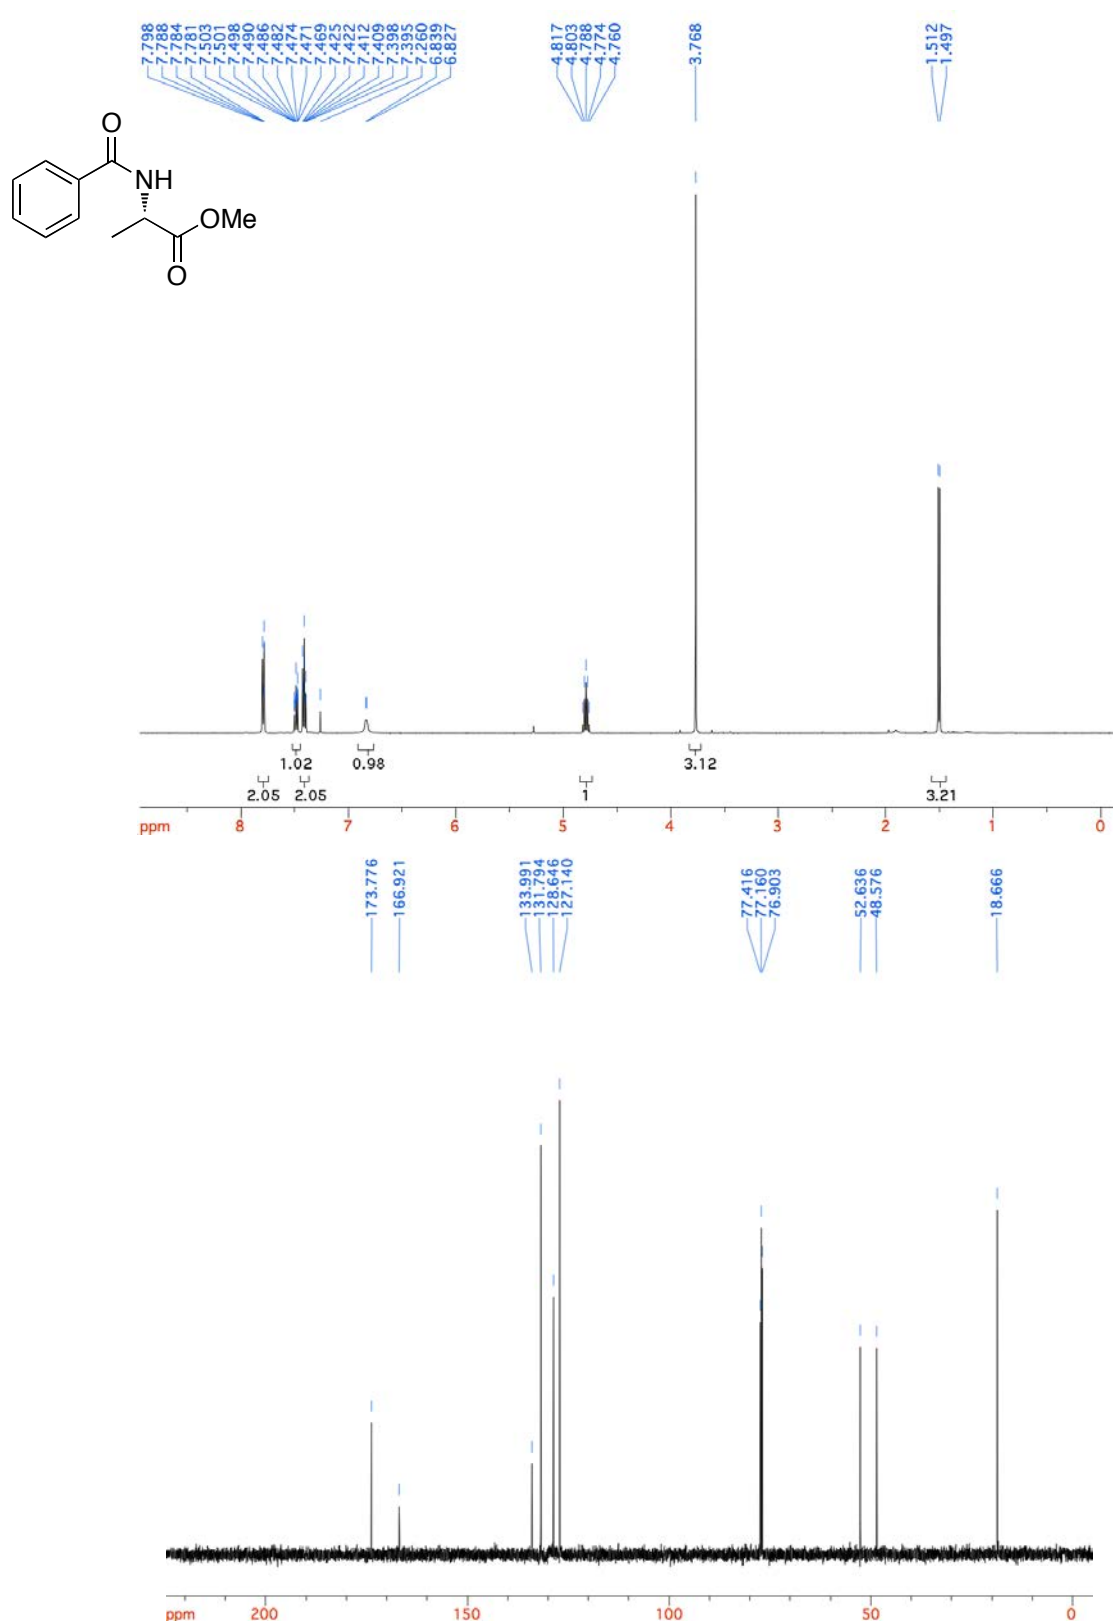

Figure S.4. *S*-Bz-Ala-OMe <sup>1</sup>H and <sup>13</sup>C NMR Spectra

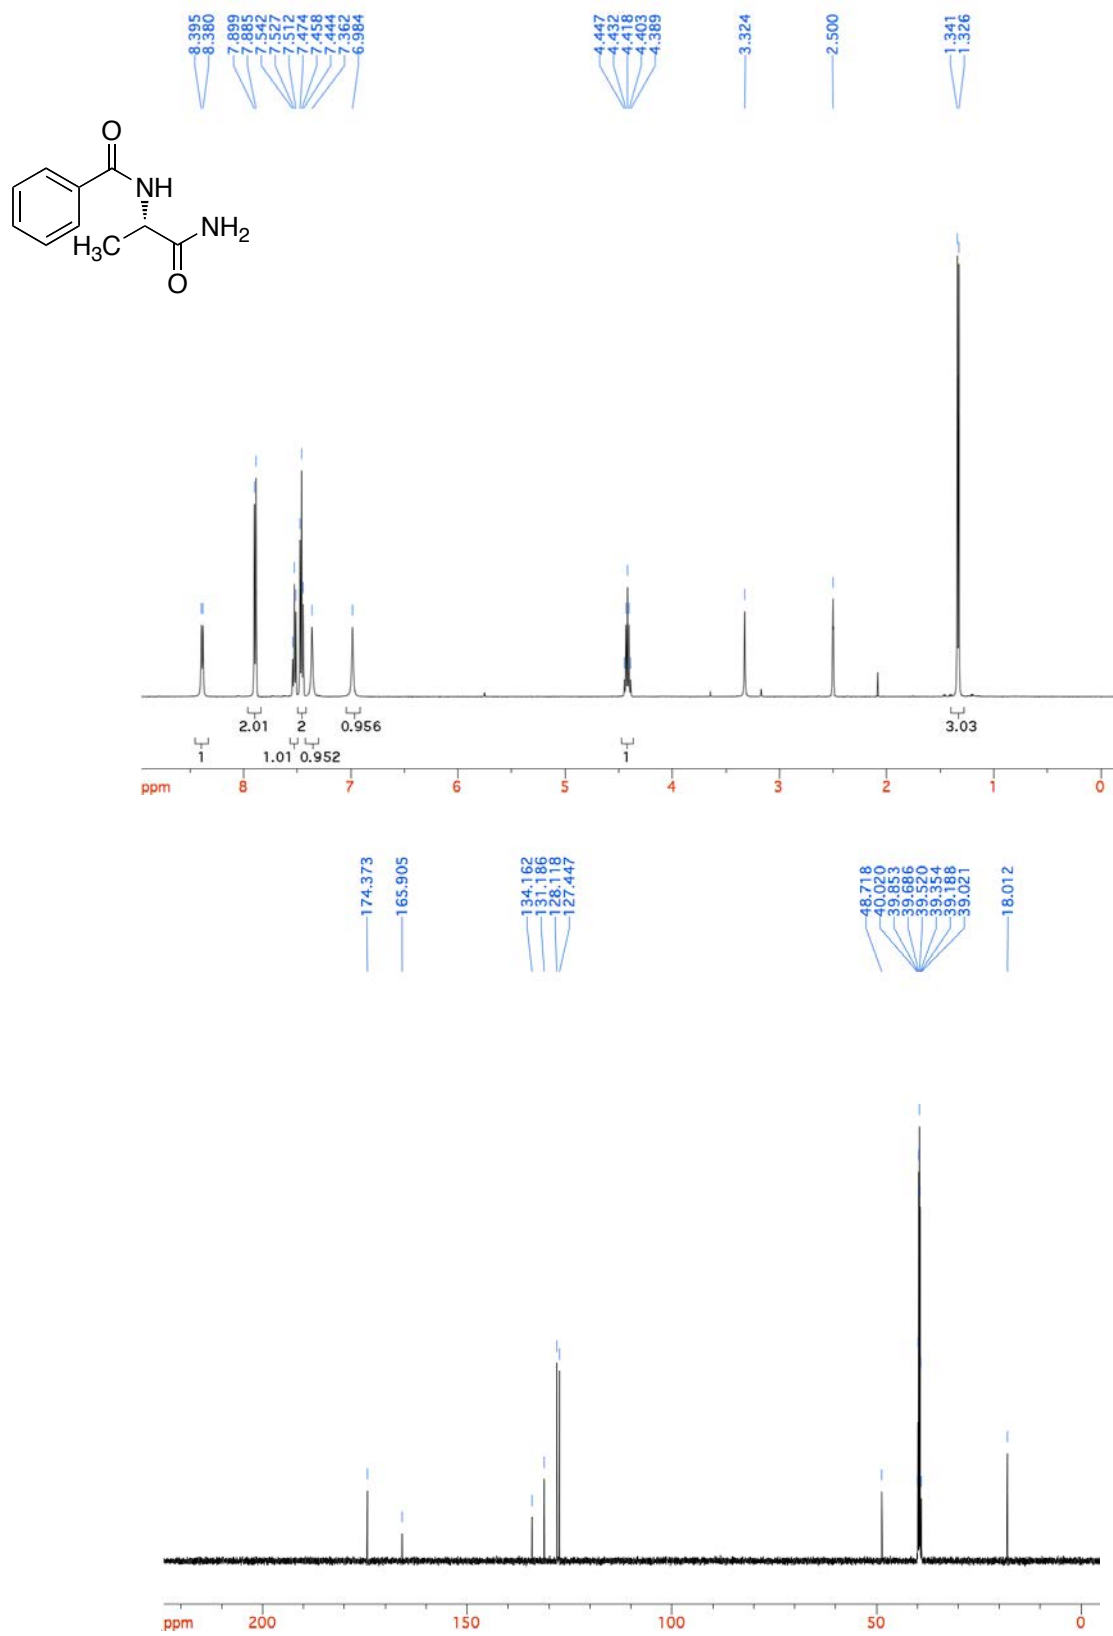

Figure S.5. *S*-Bz-Ala-II <sup>1</sup>H and <sup>13</sup>C NMR Spectra

Data File C:\CHEM32\1\DATA\AJW132\133-1-RAC.D  
 Sample Name: 133-1-rac

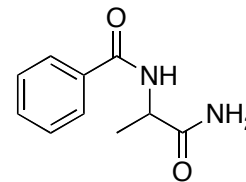

```

=====
Acq. Operator   : Alex                      Seq. Line :    5
Acq. Instrument : LC-MS                    Location  : Vial 28
Injection Date  : 11/16/2016 1:51:50 PM    Inj       :    1
                                           Inj Volume: 10 µl

Acq. Method     : C:\CHEM32\1\METHODS\COL1_HI_80_20_50MIN.M
Last changed    : 11/16/2016 1:50:49 PM by Alex
                  (modified after loading)
Analysis Method : C:\CHEM32\1\METHODS\COL1_HI_80_20_50MIN.M
Last changed    : 11/16/2016 3:39:08 PM by Alex
                  (modified after loading)
=====
  
```

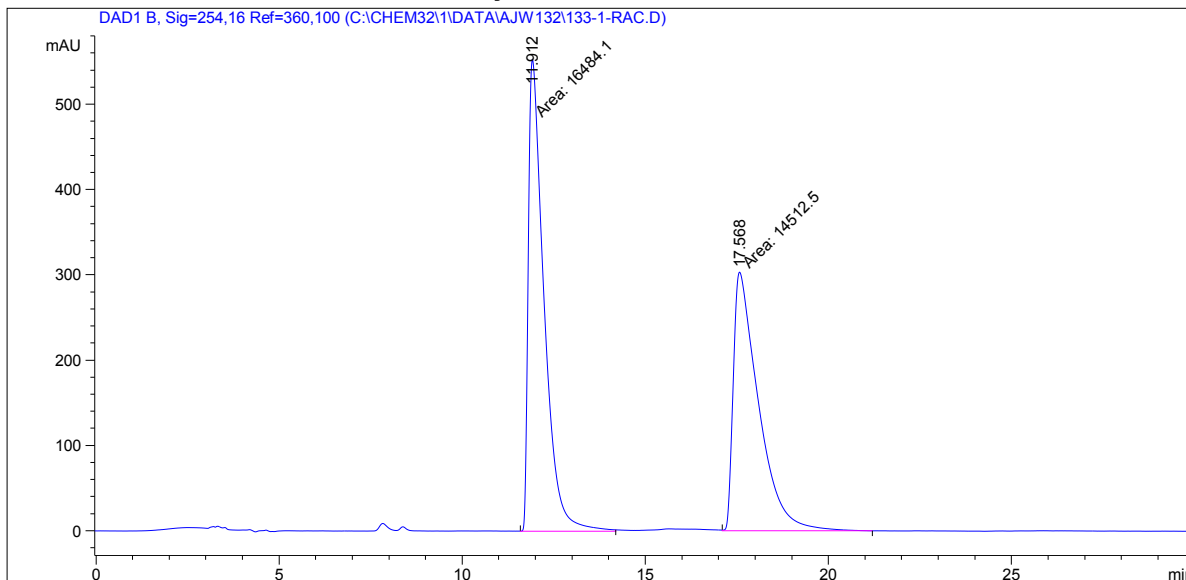

=====  
 Area Percent Report  
 =====

```

Sorted By      :      Signal
Multiplier     :      1.0000
Dilution       :      1.0000
Use Multiplier & Dilution Factor with ISTDs
  
```

Signal 1: DAD1 B, Sig=254,16 Ref=360,100

| Peak # | RetTime [min] | Type | Width [min] | Area [mAU*s] | Height [mAU] | Area %  |
|--------|---------------|------|-------------|--------------|--------------|---------|
| 1      | 11.912        | MM   | 0.4966      | 1.64841e4    | 553.17792    | 53.1805 |
| 2      | 17.568        | MM   | 0.7974      | 1.45125e4    | 303.34500    | 46.8195 |

Totals :                                    3.09966e4    856.52292

**Figure S.6. Mixture of *S*-Bz-Ala-II and *R*-Bz-Ala-II Chiral HPLC Assay**

The solution was prepared by mixing enantiopure compounds to create a scalemic sample to test enantiomeric peak separation.

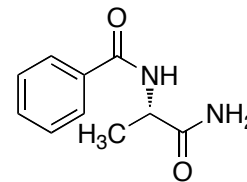

```

=====
Acq. Operator   : Alex                      Seq. Line :    6
Acq. Instrument : LC-MS                    Location  : Vial 29
Injection Date  : 11/16/2016 2:23:06 PM    Inj       :    1
                                              Inj Volume: 10 µl

Acq. Method    : C:\CHEM32\1\METHODS\COL1_HI_80_20_50MIN.M
Last changed   : 11/16/2016 2:22:05 PM by Alex
                (modified after loading)

Analysis Method: C:\CHEM32\1\METHODS\COL1_HI_80_20_50MIN.M
Last changed   : 11/16/2016 3:40:04 PM by Alex
                (modified after loading)
=====
  
```

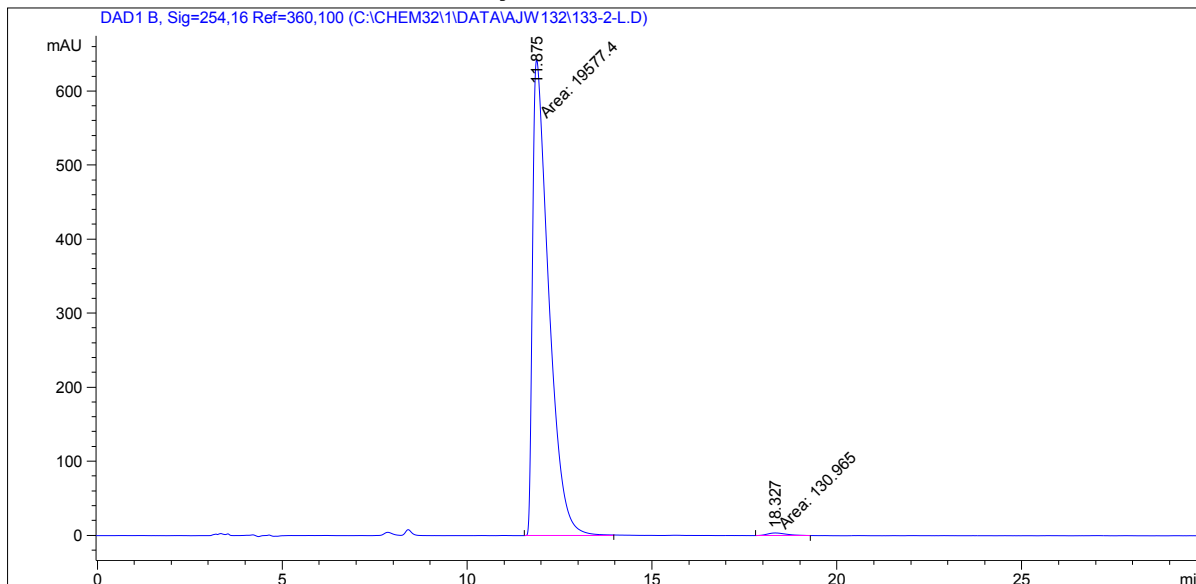

=====  
 Area Percent Report  
 =====

```

Sorted By      : Signal
Multiplier     : 1.0000
Dilution       : 1.0000
Use Multiplier & Dilution Factor with ISTDs
  
```

Signal 1: DAD1 B, Sig=254,16 Ref=360,100

| Peak # | RetTime [min] | Type | Width [min] | Area [mAU*s] | Height [mAU] | Area %  |
|--------|---------------|------|-------------|--------------|--------------|---------|
| 1      | 11.875        | MM   | 0.5074      | 1.95774e4    | 643.04706    | 99.3355 |
| 2      | 18.327        | MM   | 0.6138      | 130.96460    | 3.55627      | 0.6645  |

Totals :                            1.97083e4   646.60333

**Figure S.7. S-Bz-Ala-II Chiral HPLC Assay**

Data File C:\CHEM32\1\DATA\AJW132\133-3-D.D  
Sample Name: 133-3-D

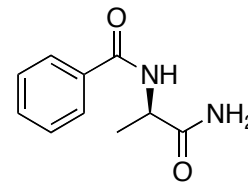

```
=====
Acq. Operator   : Alex                      Seq. Line :    7
Acq. Instrument : LC-MS                    Location  : Vial 30
Injection Date  : 11/16/2016 2:54:24 PM    Inj       :    1
                                           Inj Volume: 10 µl

Acq. Method     : C:\CHEM32\1\METHODS\COL1_HI_80_20_50MIN.M
Last changed    : 11/16/2016 2:53:22 PM by Alex
                 (modified after loading)

Analysis Method : C:\CHEM32\1\METHODS\COL1_HI_80_20_50MIN.M
Last changed    : 11/16/2016 3:41:12 PM by Alex
                 (modified after loading)
=====
```

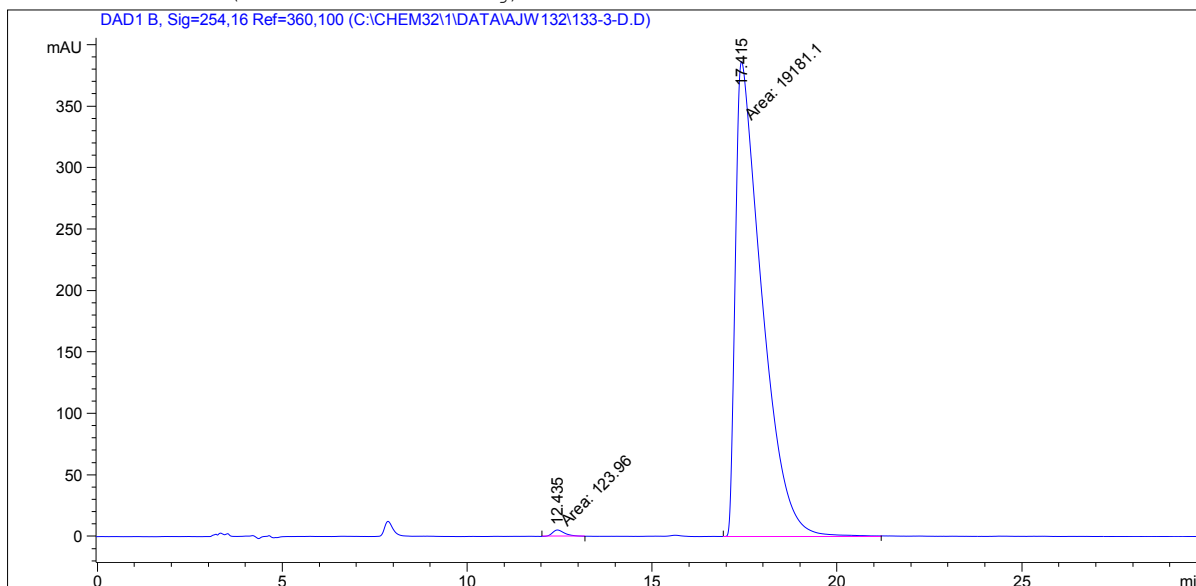

=====  
Area Percent Report  
=====

Sorted By : Signal  
Multiplier : 1.0000  
Dilution : 1.0000  
Use Multiplier & Dilution Factor with ISTDs

Signal 1: DAD1 B, Sig=254,16 Ref=360,100

| Peak # | RetTime [min] | Type | Width [min] | Area [mAU*s] | Height [mAU] | Area %  |
|--------|---------------|------|-------------|--------------|--------------|---------|
| 1      | 12.435        | MM   | 0.3974      | 123.96037    | 5.19855      | 0.6421  |
| 2      | 17.415        | MM   | 0.8273      | 1.91811e4    | 386.41077    | 99.3579 |

Totals : 1.93050e4 391.60932

LC-MS 11/16/2016 3:42:08 PM Alex

Page 1 of 2

**Figure S.8. *R*-Bz-Ala-II Chiral HPLC Assay**

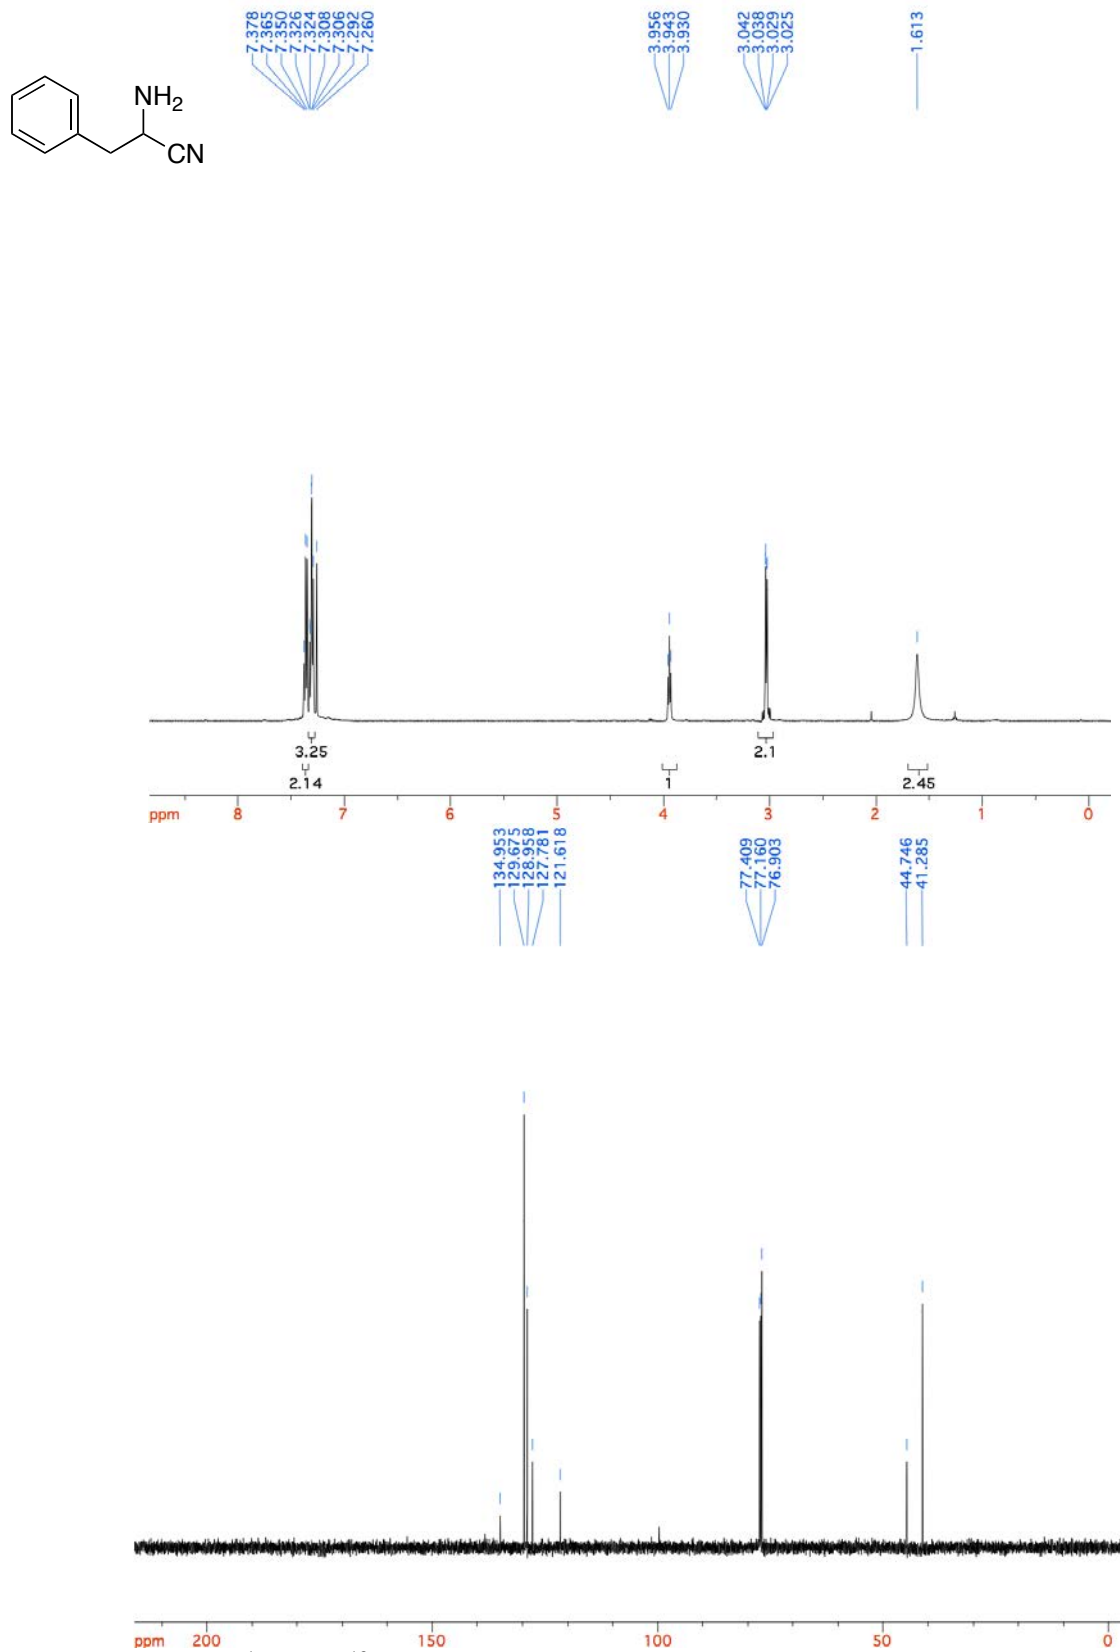

Figure S.9. Phe-I <sup>1</sup>H and <sup>13</sup>C NMR Spectra

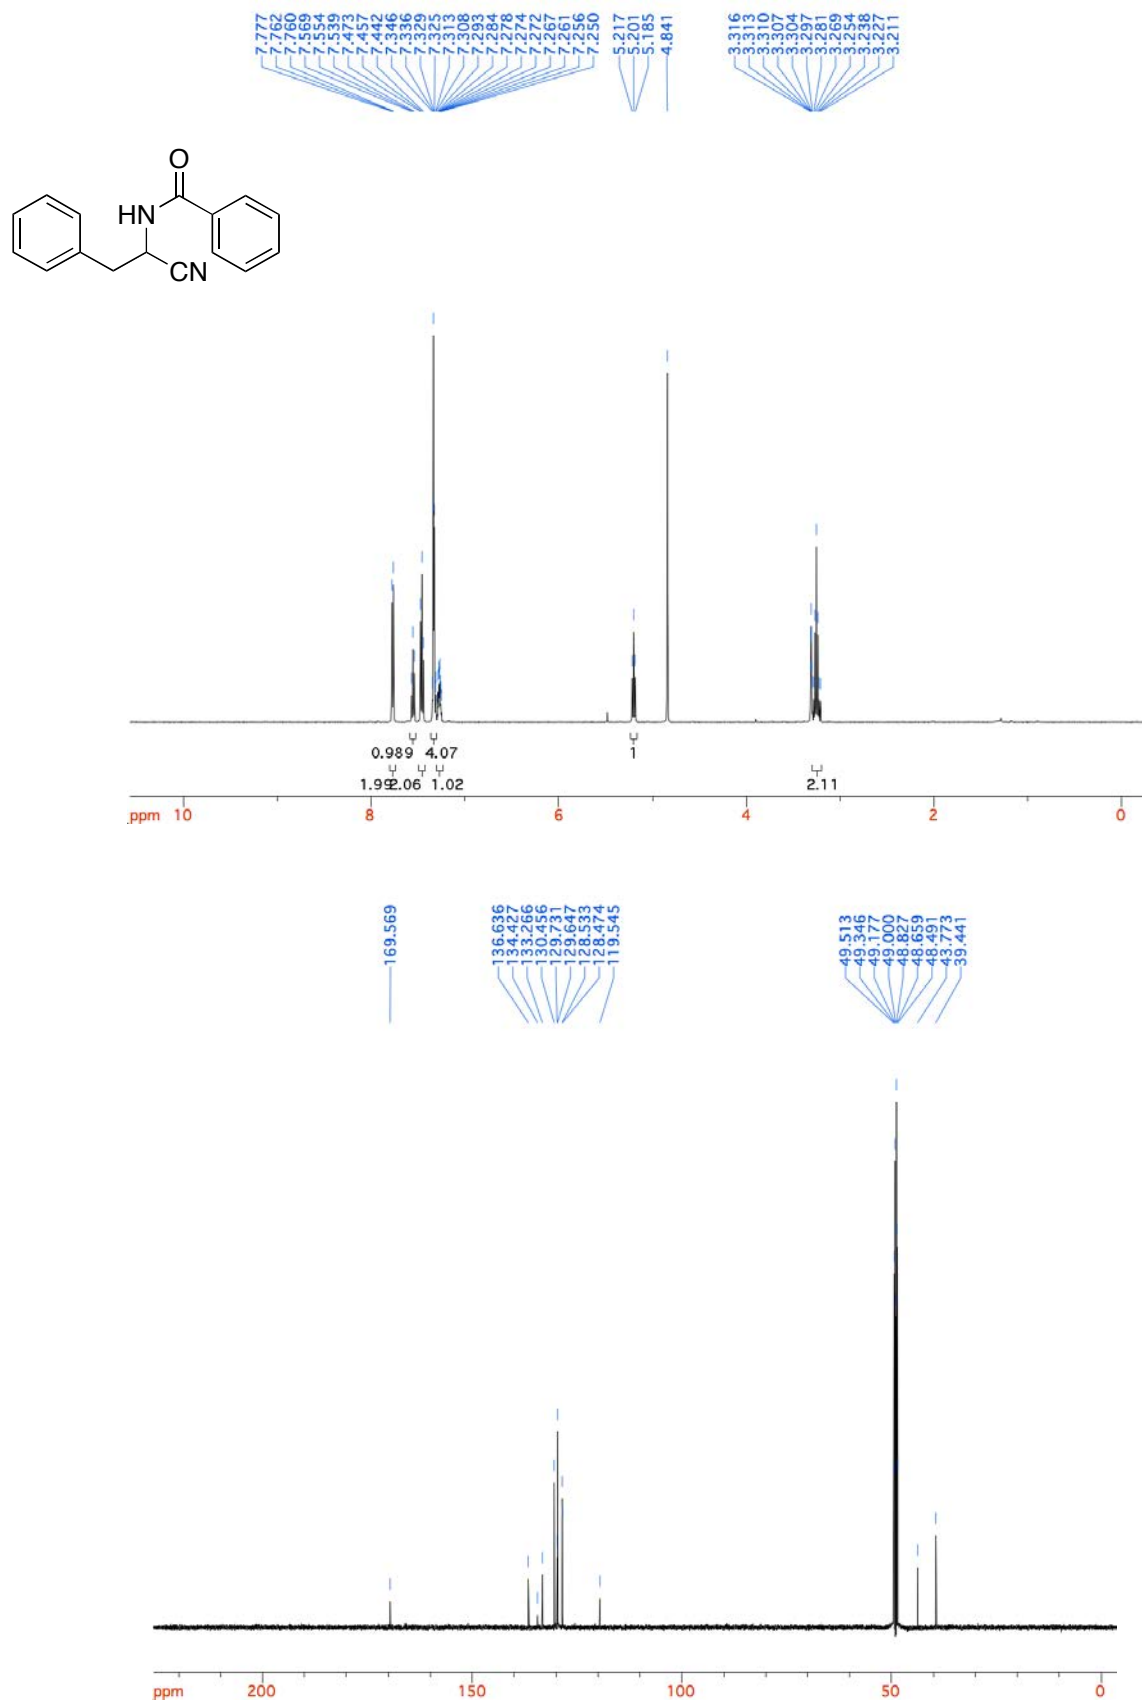

Figure S.10. Bz-Phe-I <sup>1</sup>H and <sup>13</sup>C NMR Spectra



Data File C:\CHEM32\1\DATA\AJW86\_87\87-PRODUCTRAC.D  
 Sample Name: 87-productrac

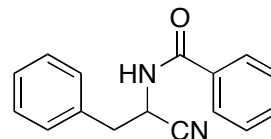

```

=====
Acq. Operator   : Alex                               Seq. Line :    4
Acq. Instrument : LC-MS                             Location  : Vial 37
Injection Date  : 8/2/2016 12:01:33 PM              Inj       :    1
                                                    Inj Volume: 10 µl

Acq. Method    : C:\CHEM32\1\METHODS\COL1_HI_80_20_50MIN.M
Last changed   : 8/2/2016 12:00:40 PM by Alex
                (modified after loading)
Analysis Method: C:\CHEM32\1\METHODS\COL1_HI_80_20_50MIN.M
Last changed   : 11/3/2016 11:42:28 AM by Neil
                (modified after loading)
=====
  
```

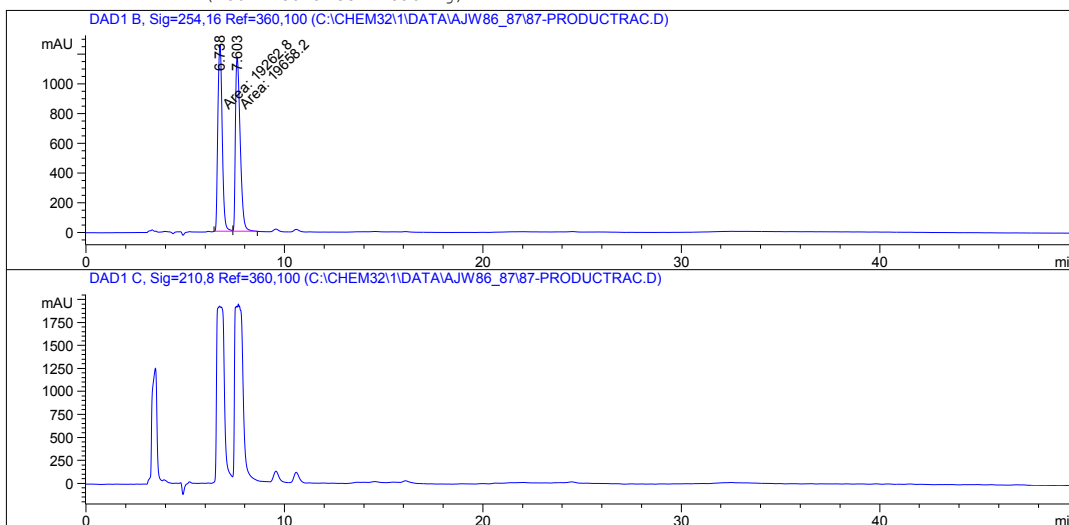

=====  
 Area Percent Report  
 =====

```

Sorted By      :      Signal
Multiplier     :      1.0000
Dilution      :      1.0000
Use Multiplier & Dilution Factor with ISTDs
  
```

Signal 1: DAD1 B, Sig=254,16 Ref=360,100

| Peak # | RetTime [min] | Type | Width [min] | Area [mAU*s] | Height [mAU] | Area %  |
|--------|---------------|------|-------------|--------------|--------------|---------|
| 1      | 6.738         | MF   | 0.2552      | 1.92628e4    | 1257.93103   | 49.4920 |
| 2      | 7.603         | FM   | 0.2795      | 1.96582e4    | 1172.07300   | 50.5080 |

Totals :                                    3.89210e4   2430.00403

### Figure S.11. Bz-Phe I Chiral HPLC Assay

AM-I conversion in crude reaction mixtures was assessed for the time-course analysis of Phe-I with D-ribose because this assay allows integration of both Bz-Phe-I and total Bz-Phe-II in a single chromatogram. All HPLC assays in this section were collected at wavelengths of 254 and 210 nm. Integration of peaks for calculating enantiomeric excess was conducted at 254 nm.

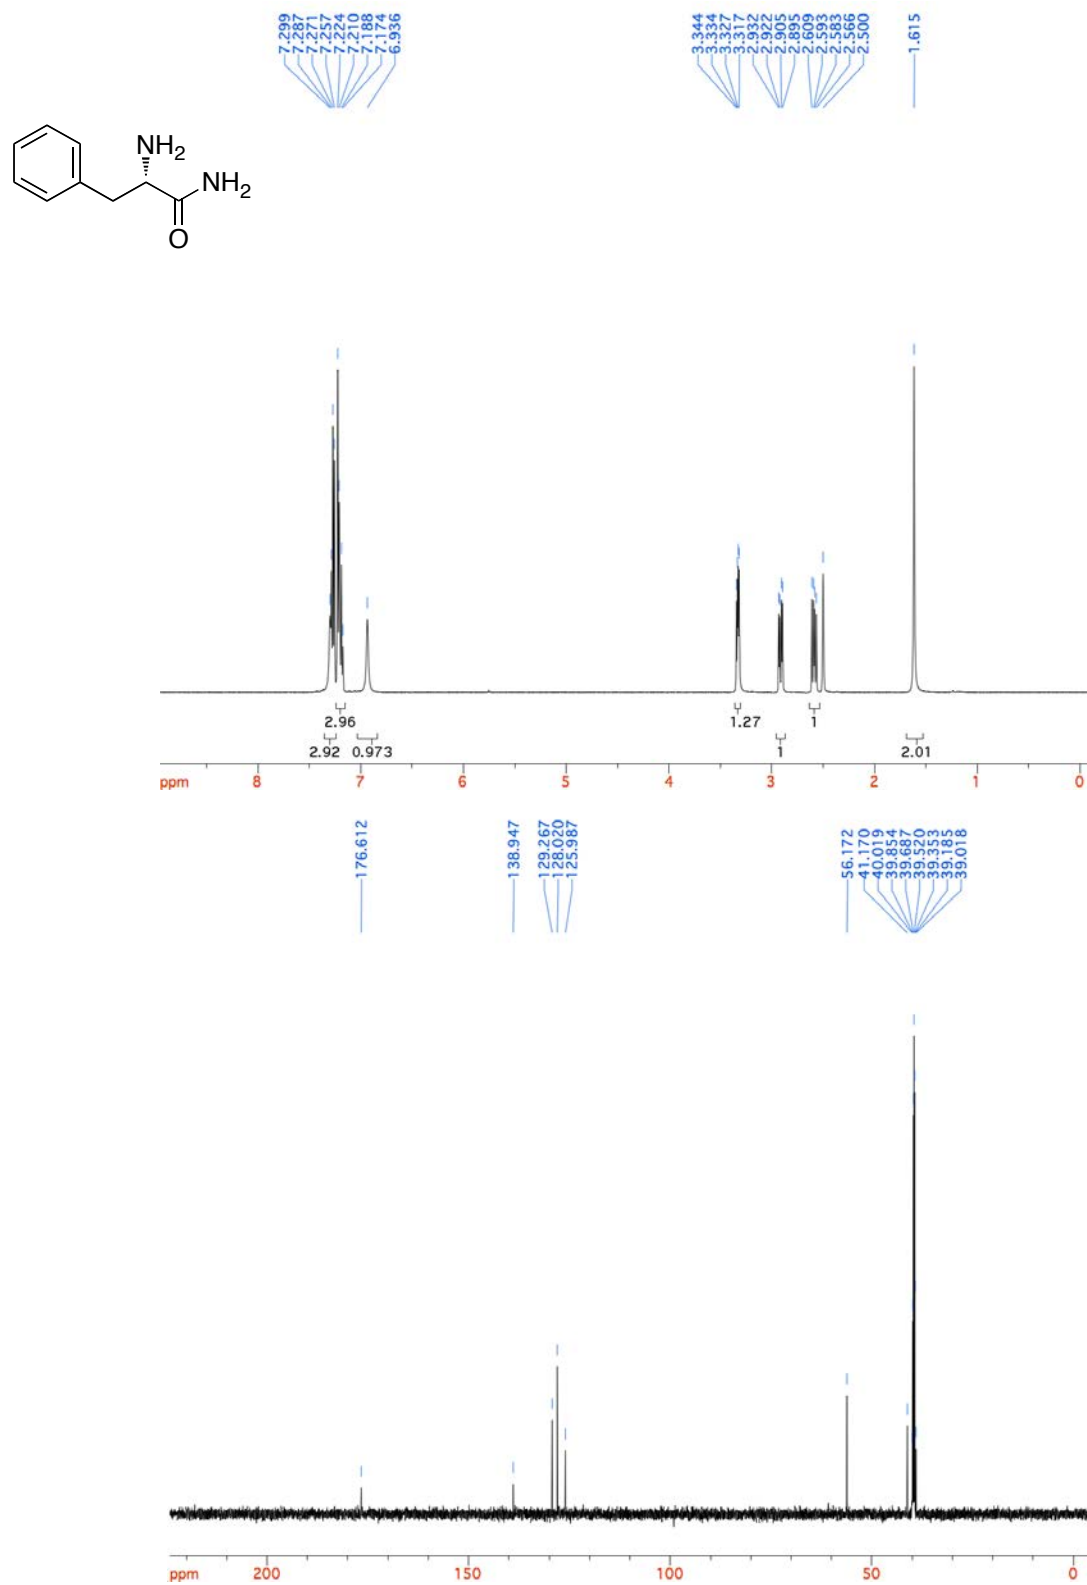

Figure S.12. *S*-Phe-II <sup>1</sup>H and <sup>13</sup>C NMR Spectra

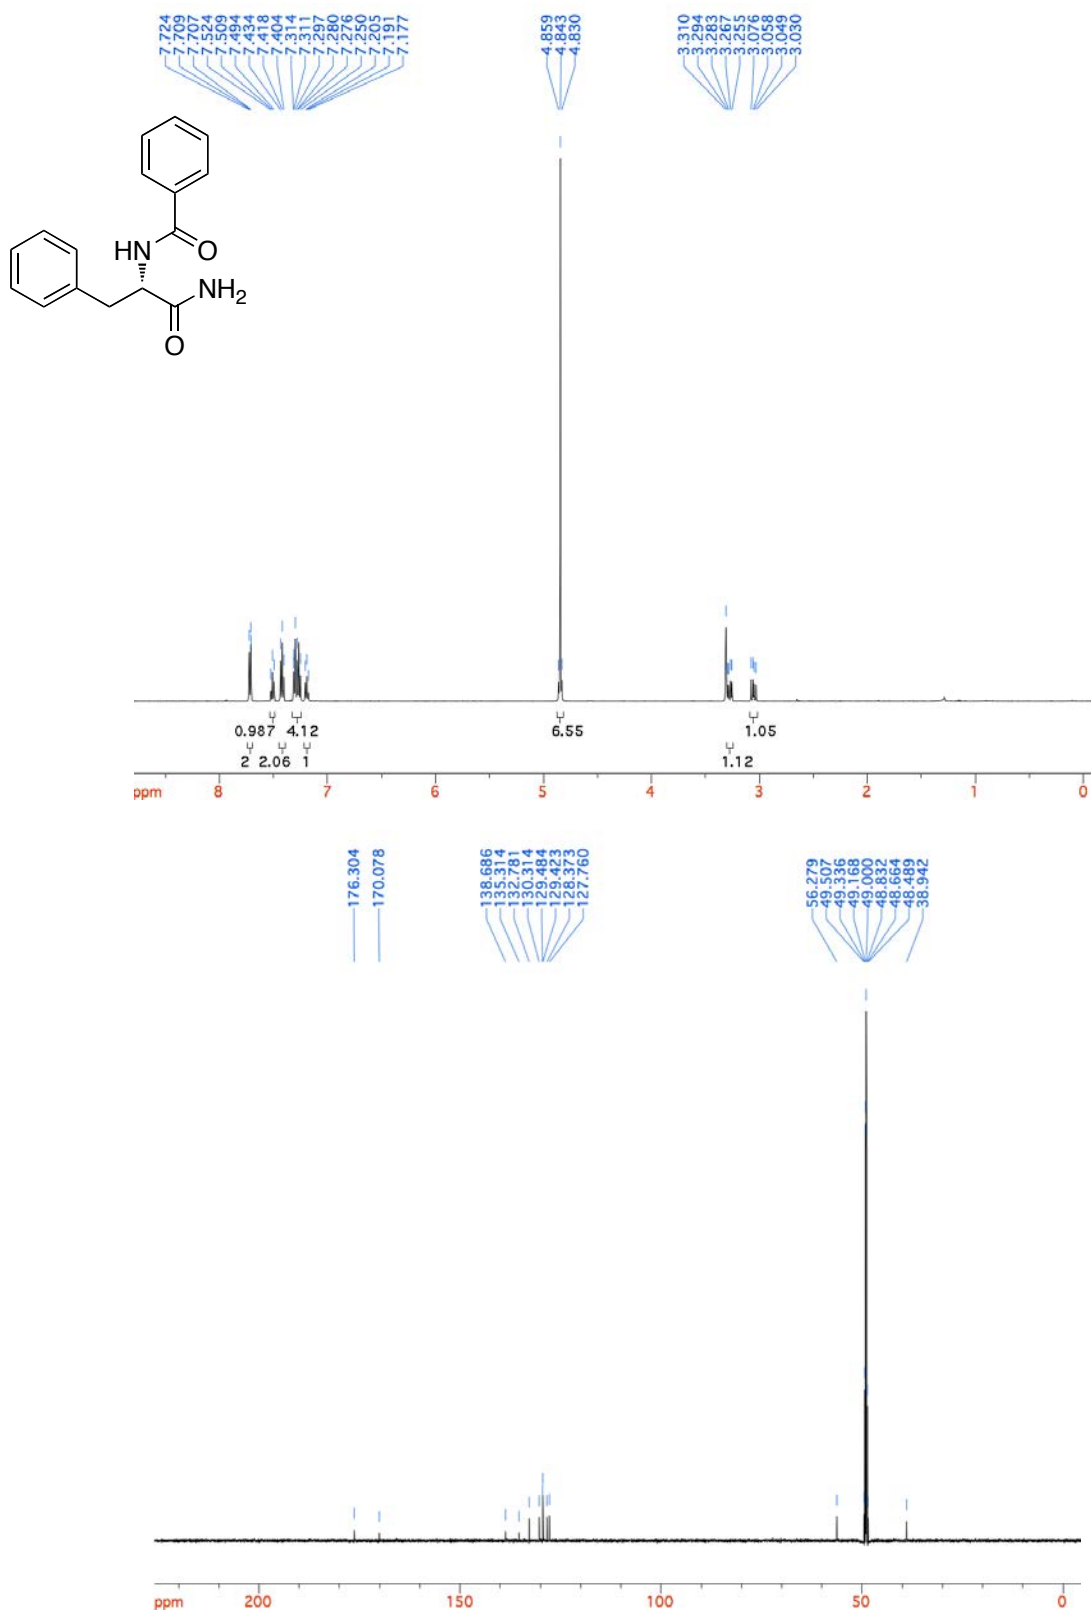

Figure S.13. *S*-Bz-Phe-II <sup>1</sup>H and <sup>13</sup>C NMR Spectra

Data File C:\CHEM32\1\DATA\AJW93\_94\93-94-MIX.D  
 Sample Name: 93-94-mix

```
=====
Acq. Operator   : Alex                               Seq. Line :    1
Acq. Instrument : LC-MS                             Location  : Vial 52
Injection Date  : 8/5/2016 11:30:26 AM              Inj       :    1
                                                    Inj Volume: 10 µl

Acq. Method     : C:\CHEM32\1\METHODS\COL1_HI_80_20_50MIN.M
Last changed    : 8/5/2016 11:29:35 AM by Alex
                  (modified after loading)

Analysis Method : C:\CHEM32\1\METHODS\COL1_OZ3_IODINATION2.M
Last changed    : 8/11/2016 1:15:02 PM by Mower
                  (modified after loading)
=====
```

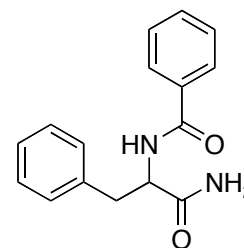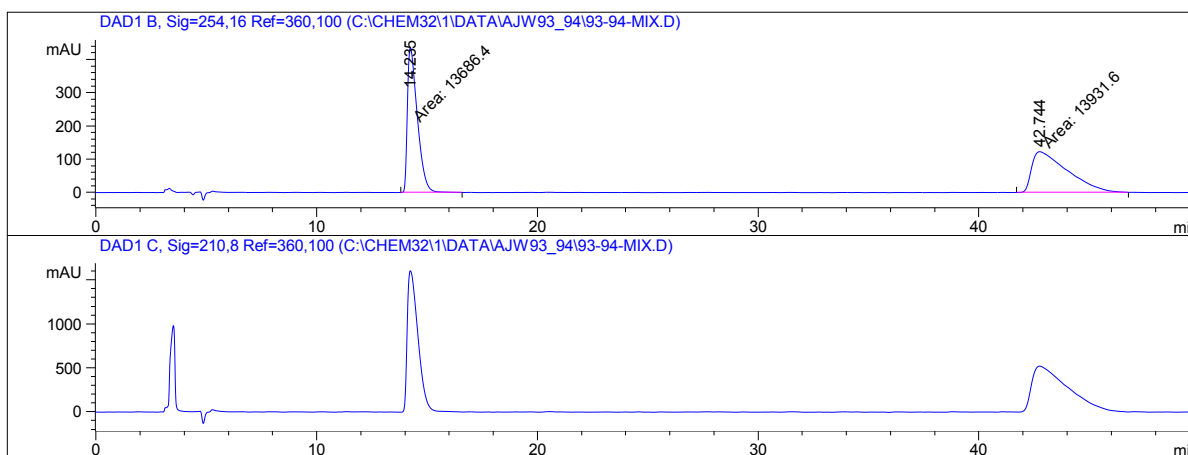

=====  
 Area Percent Report  
 =====

```
Sorted By      :      Signal
Multiplier     :      1.0000
Dilution       :      1.0000
Use Multiplier & Dilution Factor with ISTDs
```

Signal 1: DAD1 B, Sig=254,16 Ref=360,100

| Peak # | RetTime [min] | Type | Width [min] | Area [mAU*s] | Height [mAU] | Area %  |
|--------|---------------|------|-------------|--------------|--------------|---------|
| 1      | 14.235        | MM   | 0.5224      | 1.36864e4    | 436.61710    | 49.5562 |
| 2      | 42.744        | MM   | 1.8867      | 1.39316e4    | 123.06785    | 50.4438 |

Totals :                    2.76180e4    559.68494

**Figure S.14. Mixture of S-Bz-Phe-II and R-Bz-Phe-II Chiral HPLC Assay**

The solution was prepared by mixing enantiopure compounds to create a scalemic sample to test enantiomeric peak separation.

Data File C:\CHEM32\1\DATA\AJW93\_94\93-1.D  
Sample Name: 93-1

```
=====
Acq. Operator   : Alex                               Seq. Line :    2
Acq. Instrument : LC-MS                             Location  : Vial 53
Injection Date  : 8/5/2016 12:21:41 PM              Inj       :    1
                                                    Inj Volume: 10 µl
Different Inj Volume from Sequence ! Actual Inj Volume : 5 µl
Acq. Method     : C:\CHEM32\1\METHODS\COL1_HI_80_20_50MIN.M
Last changed    : 8/5/2016 12:20:56 PM by Alex
                  (modified after loading)
Analysis Method : C:\CHEM32\1\METHODS\COL1_OZ3_IODINATION2.M
Last changed    : 8/11/2016 1:16:52 PM by Mower
                  (modified after loading)
=====
```

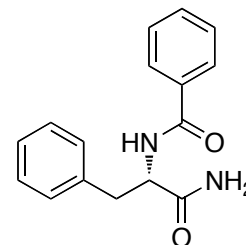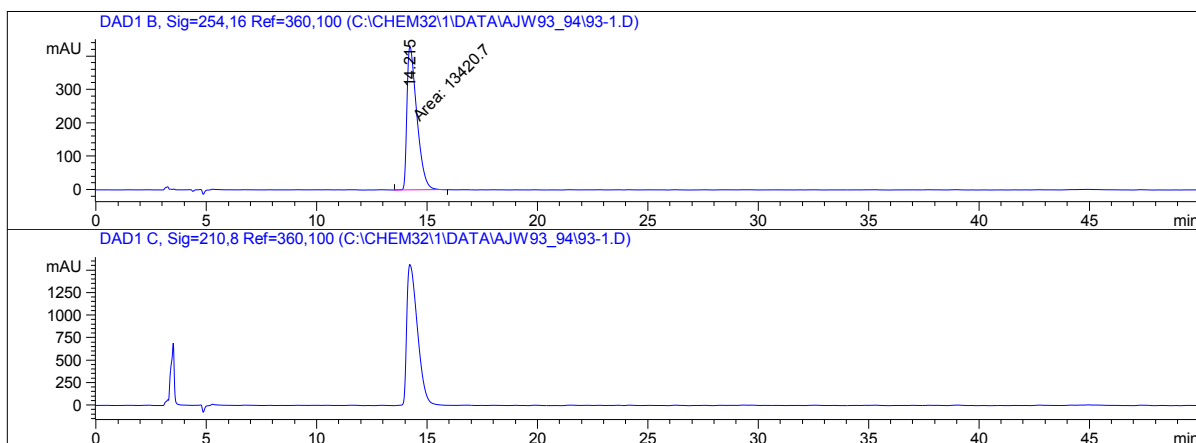

=====  
Area Percent Report  
=====

Sorted By : Signal  
Multiplier : 1.0000  
Dilution : 1.0000  
Use Multiplier & Dilution Factor with ISTDs

Signal 1: DAD1 B, Sig=254,16 Ref=360,100

| Peak # | RetTime [min] | Type | Width [min] | Area [mAU*s] | Height [mAU] | Area %   |
|--------|---------------|------|-------------|--------------|--------------|----------|
| 1      | 14.215        | MM   | 0.5208      | 1.34207e4    | 429.47223    | 100.0000 |

Totals : 1.34207e4 429.47223

**Figure S.15. S-Bz-Phe-II Chiral HPLC Assay**

Data File C:\CHEM32\1\DATA\AJW93\_94\94-1.D  
 Sample Name: 94-1

```

=====
Acq. Operator   : Alex                      Seq. Line :    3
Acq. Instrument : LC-MS                    Location  : Vial 54
Injection Date  : 8/5/2016 1:12:53 PM      Inj       :    1
                                           Inj Volume: 10 µl
                                           Actual Inj Volume: 5 µl

Different Inj Volume from Sequence !
Acq. Method     : C:\CHEM32\1\METHODS\C0L1_HI_80_20_50MIN.M
Last changed    : 8/5/2016 1:12:09 PM by Alex
                 (modified after loading)
Analysis Method : C:\CHEM32\1\METHODS\C0L1_OZ3_IODINATION2.M
Last changed    : 8/11/2016 1:17:44 PM by Mower
                 (modified after loading)
=====
  
```

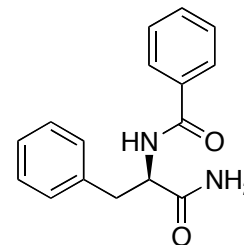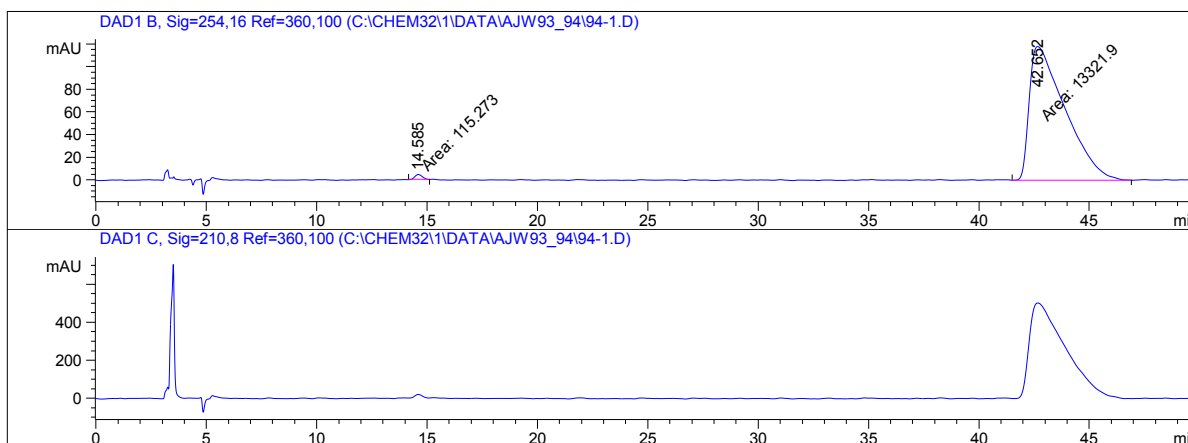

Area Percent Report

```

Sorted By      :      Signal
Multiplier     :      1.0000
Dilution       :      1.0000
Use Multiplier & Dilution Factor with ISTDs
  
```

Signal 1: DAD1 B, Sig=254,16 Ref=360,100

| Peak # | RetTime [min] | Type | Width [min] | Area [mAU*s] | Height [mAU] | Area %  |
|--------|---------------|------|-------------|--------------|--------------|---------|
| 1      | 14.585        | MM   | 0.4162      | 115.27266    | 4.61607      | 0.8579  |
| 2      | 42.652        | MM   | 1.8807      | 1.33219e4    | 118.06036    | 99.1421 |

Totals :                    1.34371e4    122.67643

Figure S.16. R-Bz-Phe-II Chiral HPLC Assay

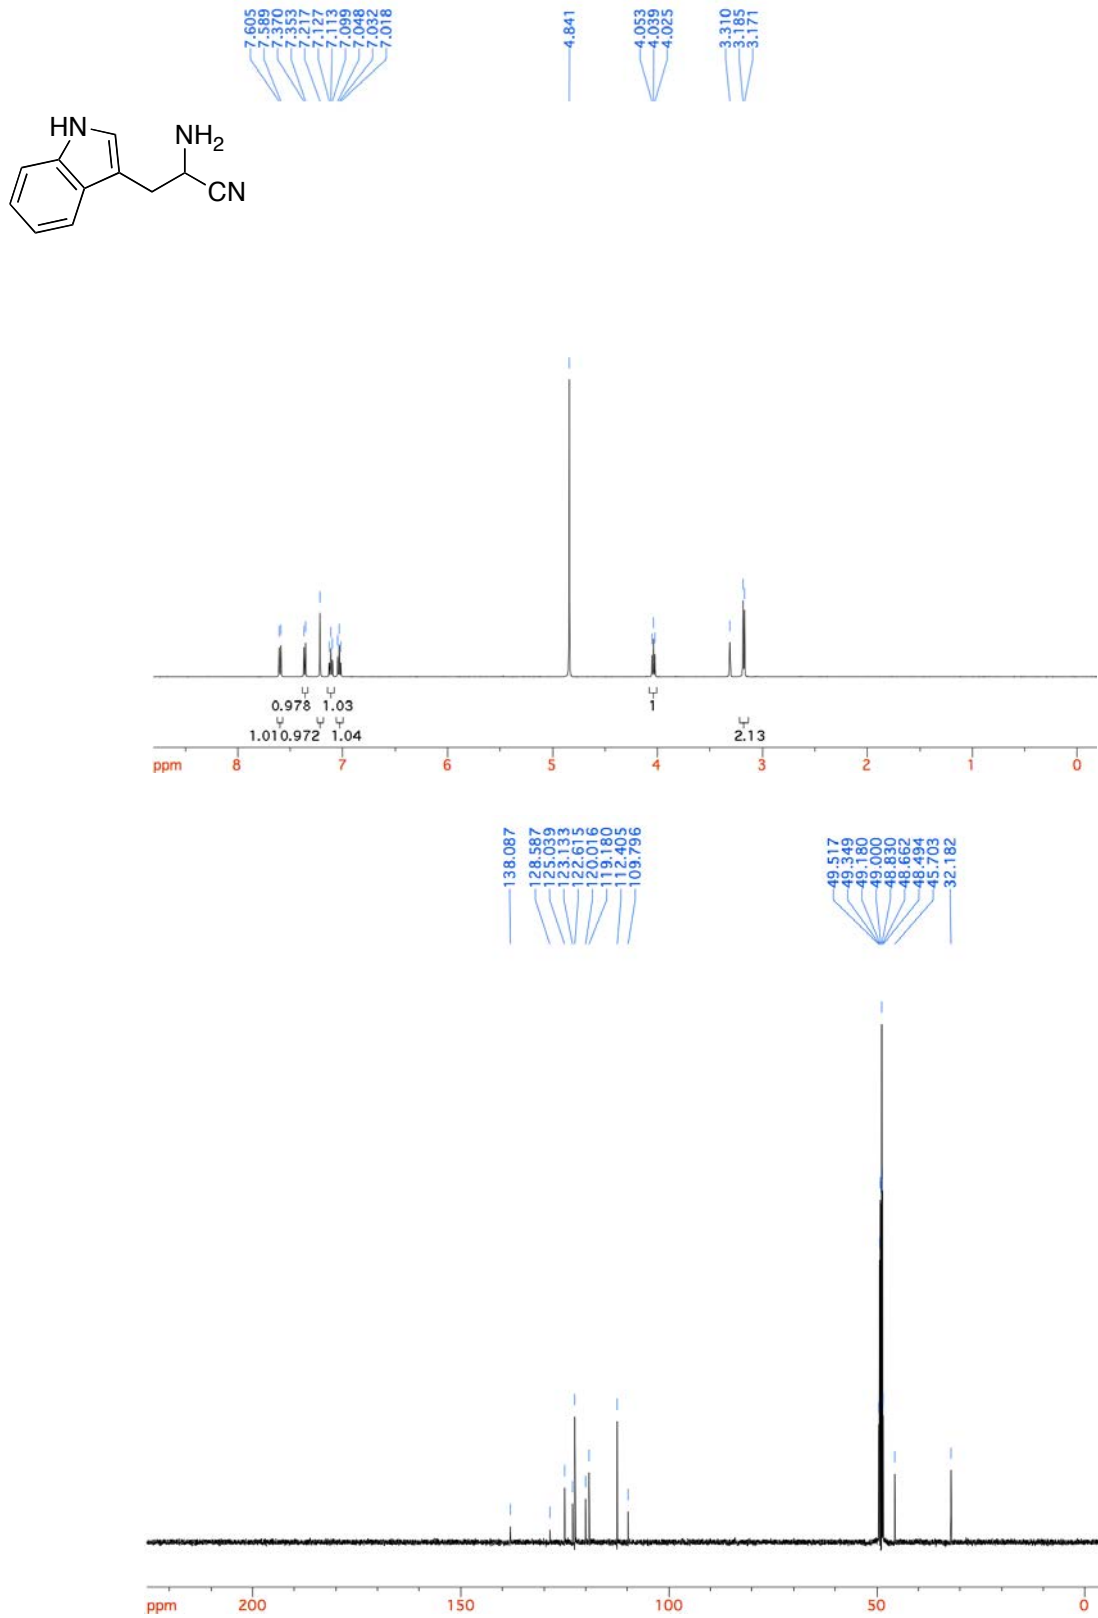

Figure S.17. Trp-I  $^1\text{H}$  and  $^{13}\text{C}$  NMR Spectra

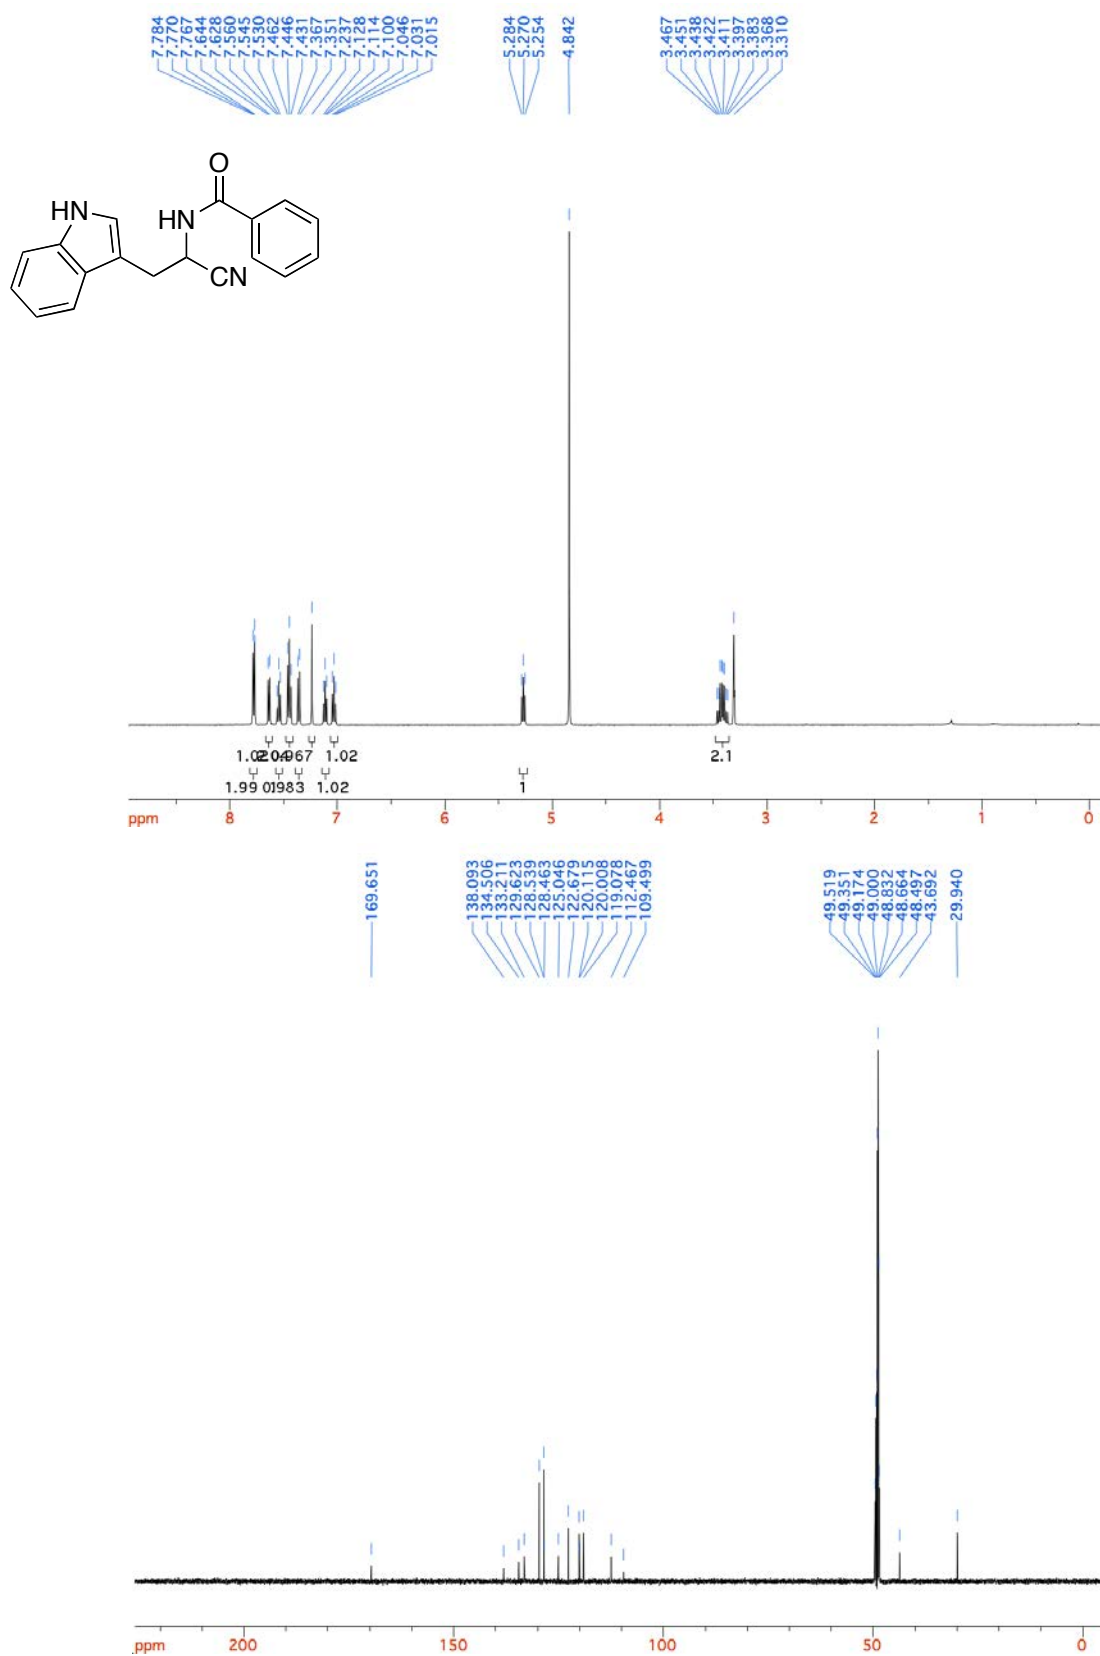

Figure S.18. Bz-Trp-I  $^1\text{H}$  and  $^{13}\text{C}$  NMR Spectr



Data File C:\CHEM32\1\DATA\AJW90\90-1.D  
 Sample Name: 90-1

```

=====
Acq. Operator   : Alex                               Seq. Line :    1
Acq. Instrument : LC-MS                             Location  : Vial 51
Injection Date  : 8/5/2016 10:18:27 AM             Inj       :    1
                                                    Inj Volume: 10 µl

Acq. Method    : C:\CHEM32\1\METHODS\COL1_HI_80_20_50MIN.M
Last changed   : 8/5/2016 10:17:39 AM by Alex
                (modified after loading)

Analysis Method: C:\CHEM32\1\METHODS\COL1_OZ3_IODINATION2.M
Last changed   : 8/5/2016 5:27:30 PM by Mower
                (modified after loading)
=====
  
```

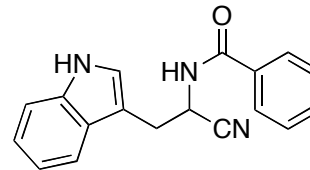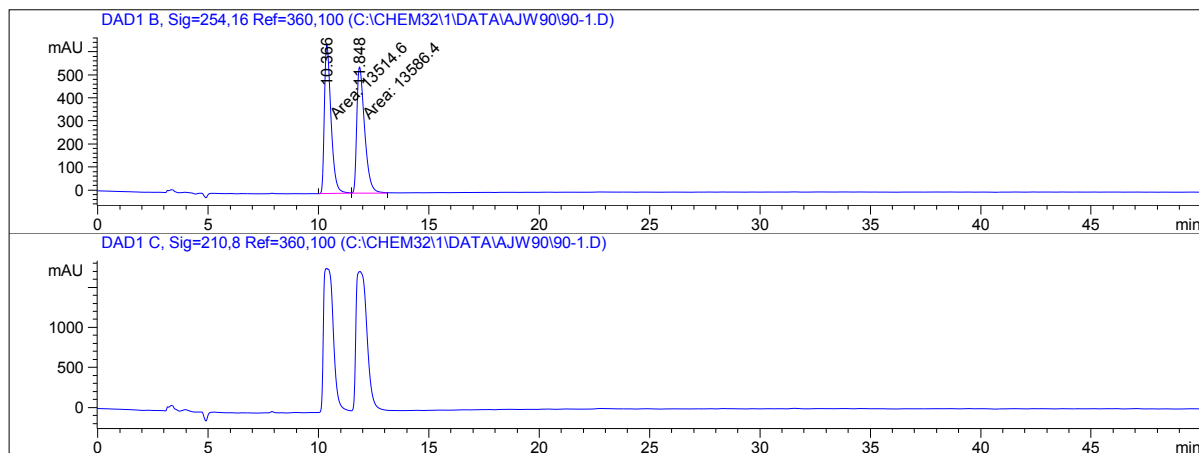

=====  
 Area Percent Report  
 =====

```

Sorted By      :      Signal
Multiplier     :      1.0000
Dilution      :      1.0000
Use Multiplier & Dilution Factor with ISTDs
  
```

Signal 1: DAD1 B, Sig=254,16 Ref=360,100

| Peak # | RetTime [min] | Type | Width [min] | Area [mAU*s] | Height [mAU] | Area %  |
|--------|---------------|------|-------------|--------------|--------------|---------|
| 1      | 10.366        | MF   | 0.3494      | 1.35146e4    | 644.64246    | 49.8675 |
| 2      | 11.848        | FM   | 0.4127      | 1.35864e4    | 548.69904    | 50.1325 |

Totals :                    2.71010e4  1193.34149

**Figure S.19. Bz-Trp-I Chiral HPLC Assay**

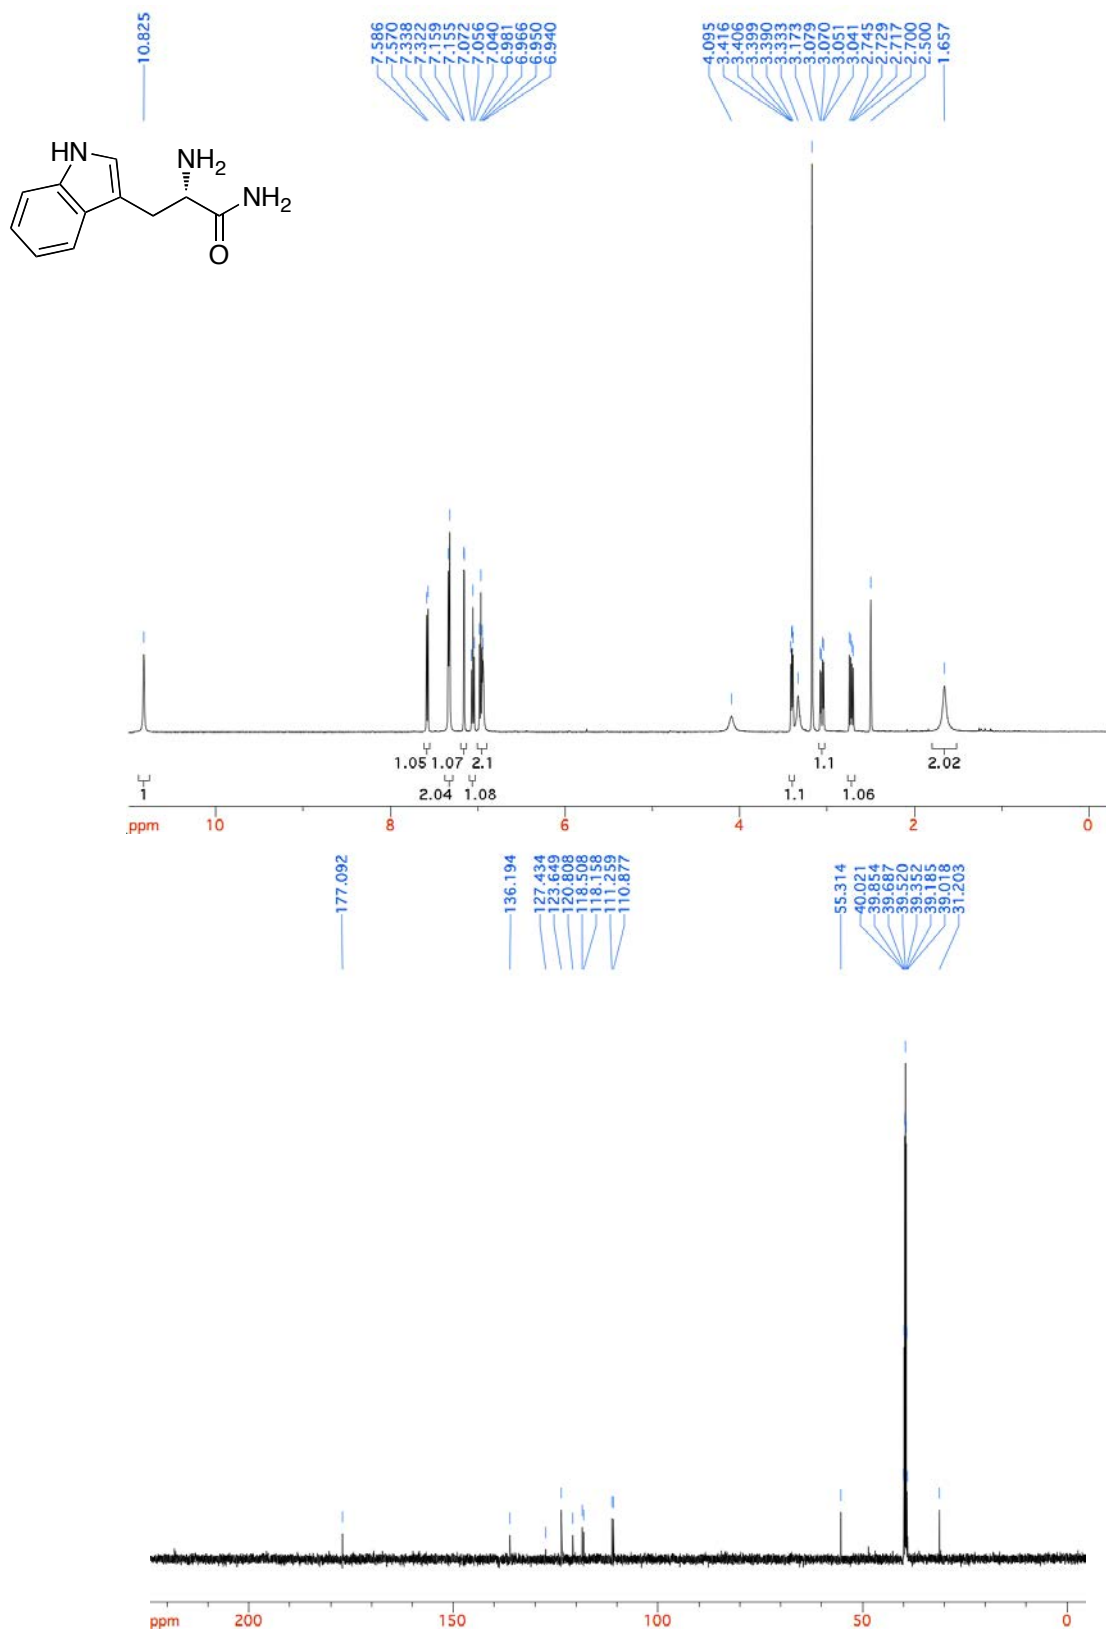

Figure S.20. *S*-Trp-II <sup>1</sup>H and <sup>13</sup>C NMR Spectra

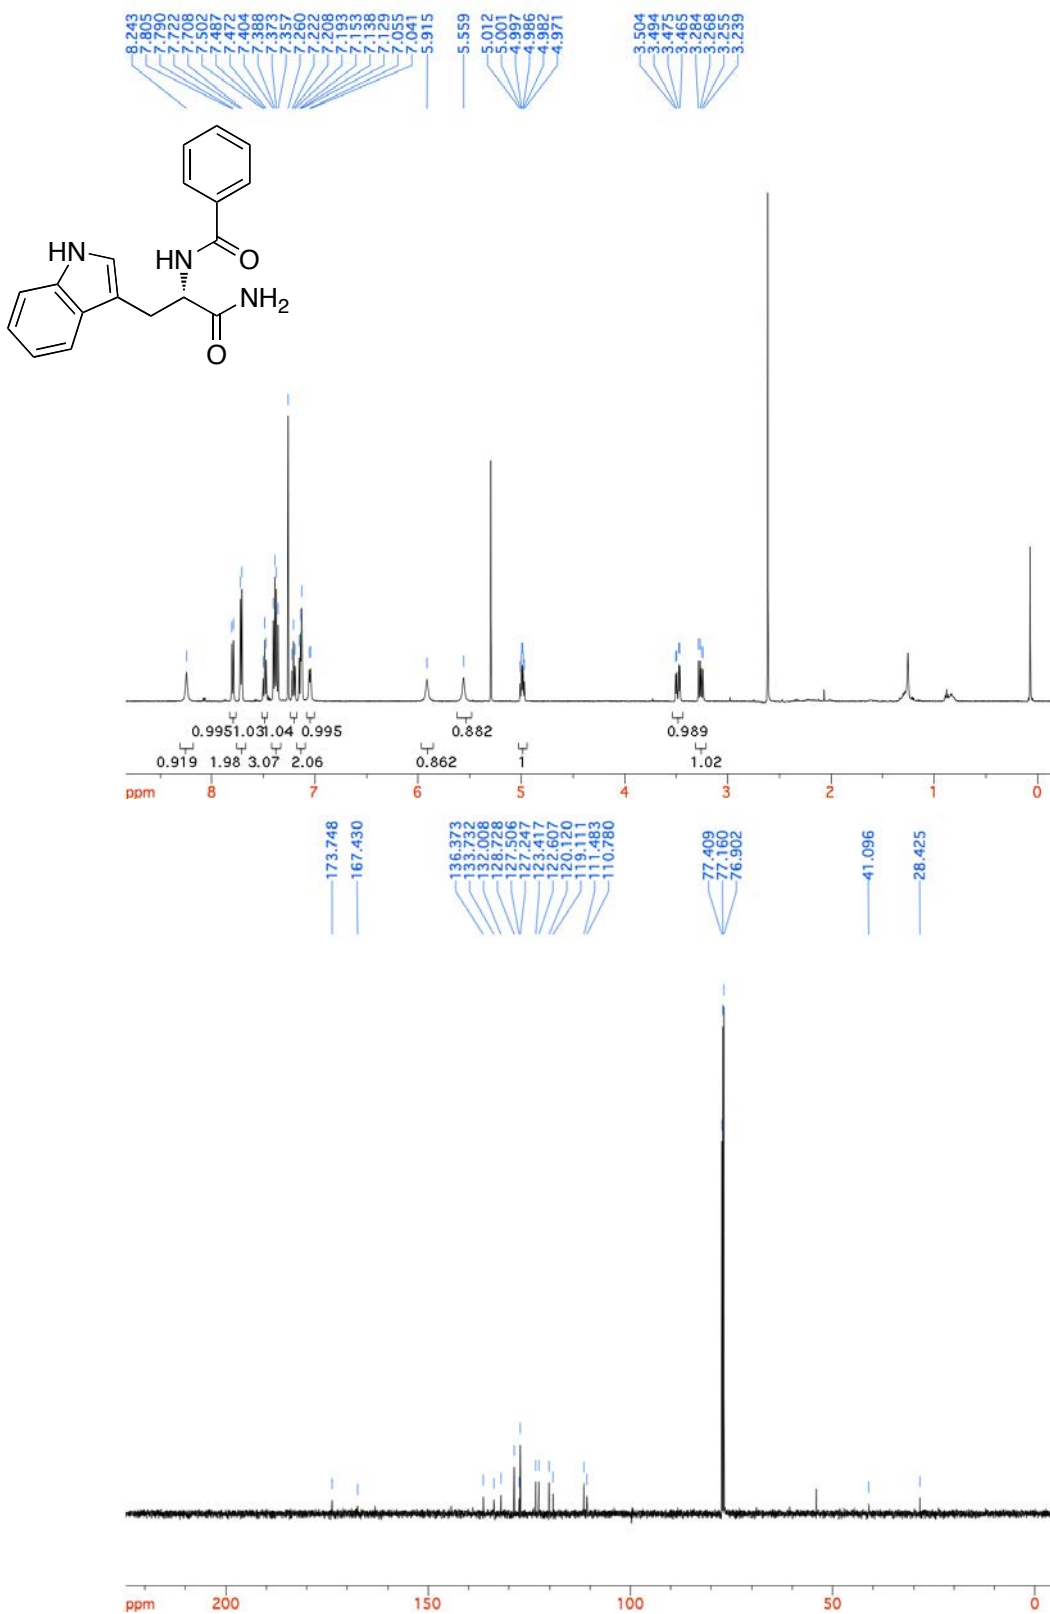

Figure S.21. *S*-Bz-Trp-II <sup>1</sup>H and <sup>13</sup>C NMR Spectra

Data File C:\CHEM32\1\DATA\AJW91\_92\91-92-MIX.D  
Sample Name: 91-92-mix

```
=====
Acq. Operator   : Alex                      Seq. Line :    1
Acq. Instrument : LC-MS                    Location  : Vial 55
Injection Date  : 8/5/2016 2:18:03 PM      Inj       :    1
                                           Inj Volume: 10 µl

Acq. Method     : C:\CHEM32\1\METHODS\COL1_HI_80_20_50MIN.M
Last changed    : 8/5/2016 2:17:15 PM by Alex
                  (modified after loading)

Analysis Method : C:\CHEM32\1\METHODS\COL1_OZ3_IODINATION2.M
Last changed    : 8/11/2016 1:11:15 PM by Mower
                  (modified after loading)
=====
```

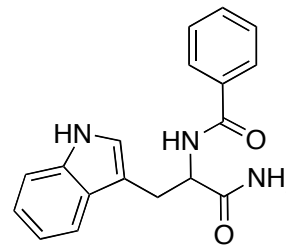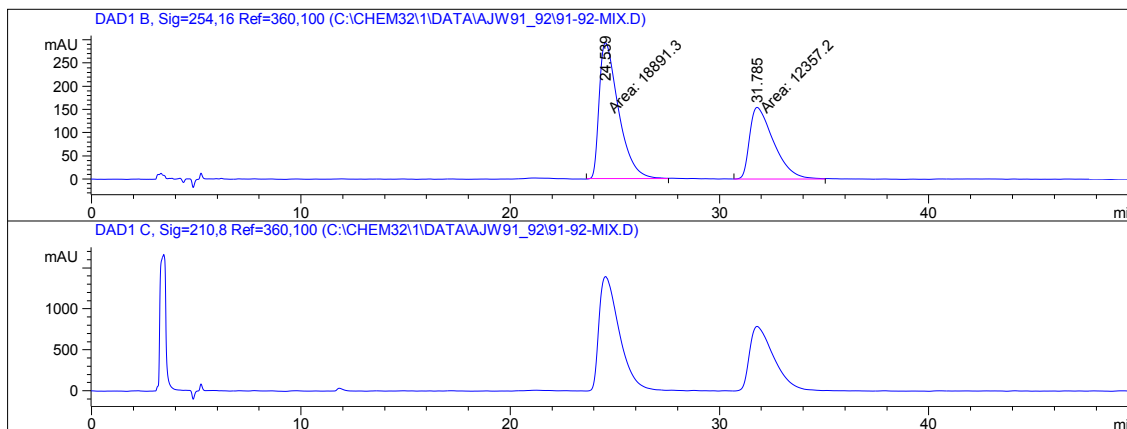

=====  
Area Percent Report  
=====

Sorted By : Signal  
Multiplier : 1.0000  
Dilution : 1.0000  
Use Multiplier & Dilution Factor with ISTDs

Signal 1: DAD1 B, Sig=254,16 Ref=360,100

| Peak # | RetTime [min] | Type | Width [min] | Area [mAU*s] | Height [mAU] | Area %  |
|--------|---------------|------|-------------|--------------|--------------|---------|
| 1      | 24.539        | MM   | 1.0735      | 1.88913e4    | 293.29895    | 60.4551 |
| 2      | 31.785        | MM   | 1.3331      | 1.23572e4    | 154.49130    | 39.5449 |

Totals : 3.12485e4 447.79025

**Figure S.22. Mixture of *S*-Bz-Trp-II and *R*-Bz-Trp-II Chiral HPLC Assay**

The solution was prepared by mixing enantiopure compounds to create a scalemic sample to test enantiomeric peak separation.

Data File C:\CHEM32\1\DATA\AJW91\_92\91-1.D  
 Sample Name: 91-1

```

=====
Acq. Operator   : Alex                      Seq. Line :    2
Acq. Instrument : LC-MS                     Location  : Vial 56
Injection Date  : 8/5/2016 3:09:22 PM      Inj       :    1
                                           Inj Volume: 10 µl

Acq. Method    : C:\CHEM32\1\METHODS\COL1_HI_80_20_50MIN.M
Last changed   : 8/5/2016 3:08:33 PM by Alex
                (modified after loading)

Analysis Method: C:\CHEM32\1\METHODS\COL1_OZ3_IODINATION2.M
Last changed   : 8/11/2016 1:12:32 PM by Mower
                (modified after loading)
=====
  
```

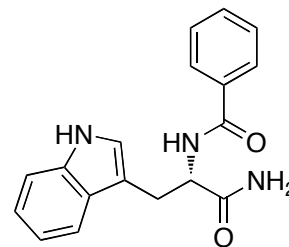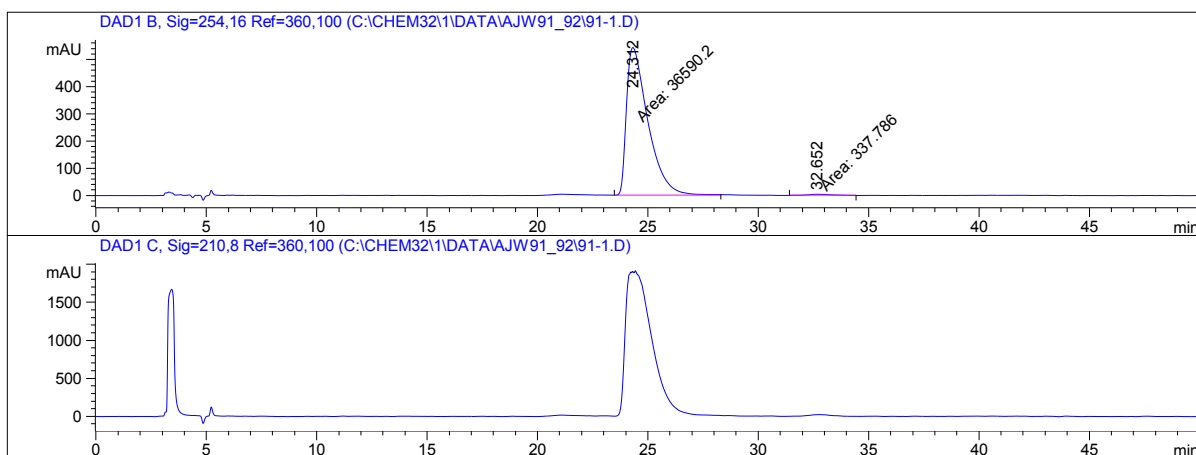

=====  
 Area Percent Report  
 =====

```

Sorted By      :      Signal
Multiplier     :      1.0000
Dilution      :      1.0000
Use Multiplier & Dilution Factor with ISTDs
  
```

Signal 1: DAD1 B, Sig=254,16 Ref=360,100

| Peak # | RetTime [min] | Type | Width [min] | Area [mAU*s] | Height [mAU] | Area %  |
|--------|---------------|------|-------------|--------------|--------------|---------|
| 1      | 24.312        | MM   | 1.1238      | 3.65902e4    | 542.66974    | 99.0853 |
| 2      | 32.652        | MM   | 1.2923      | 337.78650    | 4.35647      | 0.9147  |

Totals :                    3.69280e4    547.02621

**Figure S.23. S-Bz-Trp-II Chiral HPLC Assay**

Data File C:\CHEM32\1\DATA\AJW91\_92\92-1.D  
 Sample Name: 92-1

```

=====
Acq. Operator   : Alex                      Seq. Line :    3
Acq. Instrument : LC-MS                    Location  : Vial 57
Injection Date  : 8/5/2016 4:00:40 PM      Inj       :    1
                                           Inj Volume: 10 µl

Acq. Method     : C:\CHEM32\1\METHODS\COL1_HI_80_20_50MIN.M
Last changed    : 8/5/2016 3:59:52 PM by Alex
                 (modified after loading)

Analysis Method : C:\CHEM32\1\METHODS\COL1_OZ3_IODINATION2.M
Last changed    : 8/11/2016 1:13:49 PM by Mower
                 (modified after loading)
=====
  
```

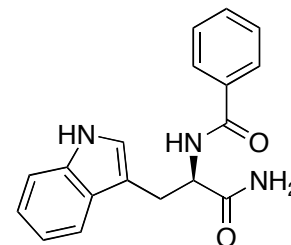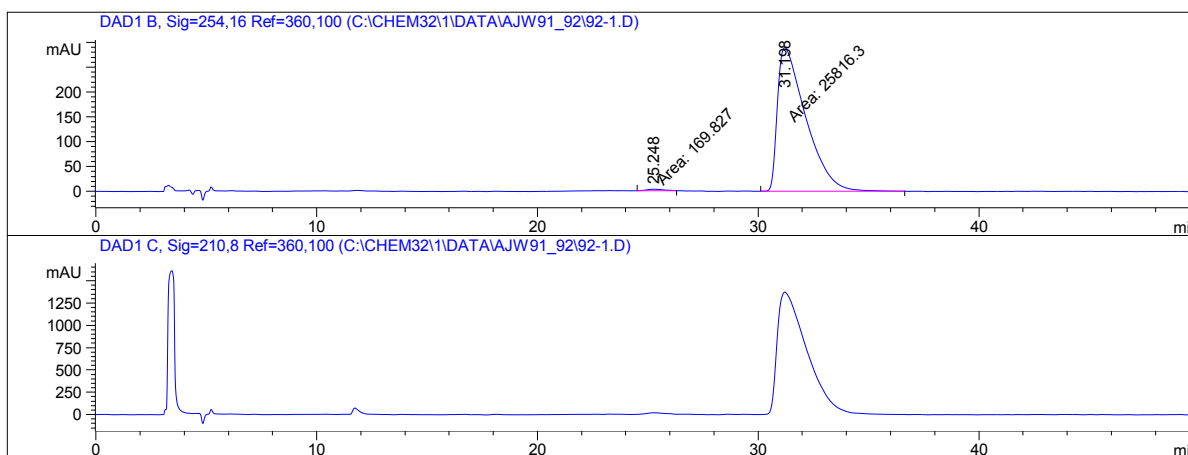

=====  
 Area Percent Report  
 =====

```

Sorted By      :      Signal
Multiplier     :      1.0000
Dilution       :      1.0000
Use Multiplier & Dilution Factor with ISTDs
  
```

Signal 1: DAD1 B, Sig=254,16 Ref=360,100

| Peak # | RetTime [min] | Type | Width [min] | Area [mAU*s] | Height [mAU] | Area %  |
|--------|---------------|------|-------------|--------------|--------------|---------|
| 1      | 25.248        | MM   | 0.9111      | 169.82707    | 3.10671      | 0.6535  |
| 2      | 31.198        | MM   | 1.4859      | 2.58163e4    | 289.56207    | 99.3465 |

Totals :                    2.59862e4    292.66878

**Figure S.24. R-Bz-Trp-II Chiral HPLC Assay**

## 5. HPLC Assays from Reactions with Ala-I, Phe-I, and Trp-I

Data File C:\CHEM32\NH\161128\144-1-PDT.D  
 Sample Name: 144-1-pdt

```

=====
Acq. Operator   : Neil                               Seq. Line : 14
Acq. Instrument : LC-MS                               Location  : Vial 11
Injection Date  : 11/28/2016 6:35:43 PM              Inj       : 1
                                                    Inj Volume: 10 µl

Acq. Method     : C:\CHEM32\1\METHODS\COL1_HI_80_20_30MIN.M
Last changed    : 11/28/2016 6:34:45 PM by Neil
                  (modified after loading)

Analysis Method  : C:\CHEM32\1\METHODS\COL1_HI_80_20_30MIN.M
Last changed    : 11/28/2016 3:36:41 PM by Alex
                  (modified after loading)
  
```

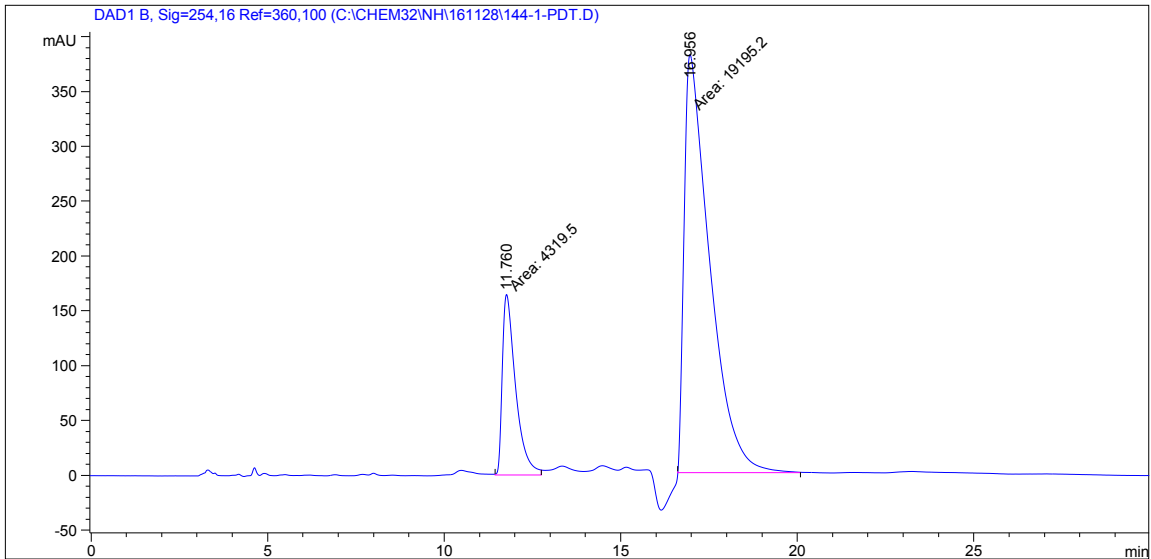

### Area Percent Report

```

=====
Sorted By      : Signal
Multiplier     : 1.0000
Dilution       : 1.0000
Use Multiplier & Dilution Factor with ISTDs
  
```

Signal 1: DAD1 B, Sig=254,16 Ref=360,100

| Peak # | RetTime [min] | Type | Width [min] | Area [mAU*s] | Height [mAU] | Area %  |
|--------|---------------|------|-------------|--------------|--------------|---------|
| 1      | 11.760        | MM   | 0.4374      | 4319.49951   | 164.59904    | 18.3694 |
| 2      | 16.956        | MM   | 0.8393      | 1.91952e4    | 381.15628    | 81.6306 |

Totals : 2.35147e4 545.75533

LC-MS 11/29/2016 7:21:25 AM Alex

Page 1 of 2

**Figure S.25. D-Ribose with Ala-I – Bz-Ala-II Chiral HPLC Assay**

Data File C:\CHEM32\NH\161128\144-2-PDT.D  
Sample Name: 144-2-pdt

```
=====
Acq. Operator   : Neil                               Seq. Line : 15
Acq. Instrument : LC-MS                             Location  : Vial 12
Injection Date  : 11/28/2016 7:06:57 PM             Inj       : 1
                                                    Inj Volume: 10 µl

Acq. Method     : C:\CHEM32\1\METHODS\COL1_HI_80_20_30MIN.M
Last changed    : 11/28/2016 7:06:01 PM by Neil
                  (modified after loading)
Analysis Method : C:\CHEM32\1\METHODS\COL1_HI_80_20_30MIN.M
Last changed    : 11/29/2016 7:21:26 AM by Alex
                  (modified after loading)
=====
```

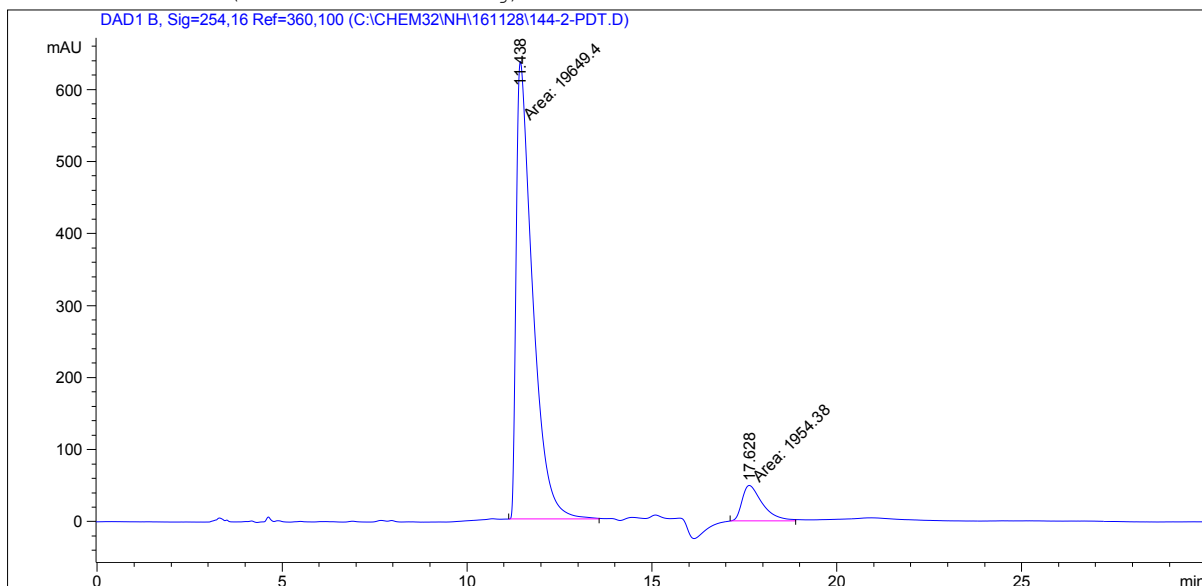

=====  
Area Percent Report  
=====

```
Sorted By      :      Signal
Multiplier     :      1.0000
Dilution       :      1.0000
Use Multiplier & Dilution Factor with ISTDs
```

Signal 1: DAD1 B, Sig=254,16 Ref=360,100

| Peak # | RetTime [min] | Type | Width [min] | Area [mAU*s] | Height [mAU] | Area %  |
|--------|---------------|------|-------------|--------------|--------------|---------|
| 1      | 11.438        | MM   | 0.5154      | 1.96494e4    | 635.44440    | 90.9536 |
| 2      | 17.628        | MM   | 0.6534      | 1954.37512   | 49.85096     | 9.0464  |

Totals :                      2.16038e4    685.29535

LC-MS 11/29/2016 7:22:25 AM Alex

Page 1 of 2

**Figure S.26. D-Lyxose with Ala-I – Bz-Ala-II Chiral HPLC Assay**



Data File C:\CHEM32\1\DATA\AJW1192\119-19-PDT.D  
Sample Name: 119-19-pdt

```
=====
Acq. Operator   : Alex                      Seq. Line : 17
Acq. Instrument : LC-MS                    Location  : Vial 28
Injection Date  : 10/20/2016 2:34:27 AM    Inj       : 1
                                           Inj Volume: 10 µl

Acq. Method     : C:\CHEM32\1\METHODS\COL1_HI_80_20_50MIN.M
Last changed    : 10/20/2016 2:33:01 AM by Alex
                 (modified after loading)

Analysis Method : C:\CHEM32\1\METHODS\COL1_OZ3_IODINATION2.M
Last changed    : 10/20/2016 7:59:29 AM by Neil
                 (modified after loading)
=====
```

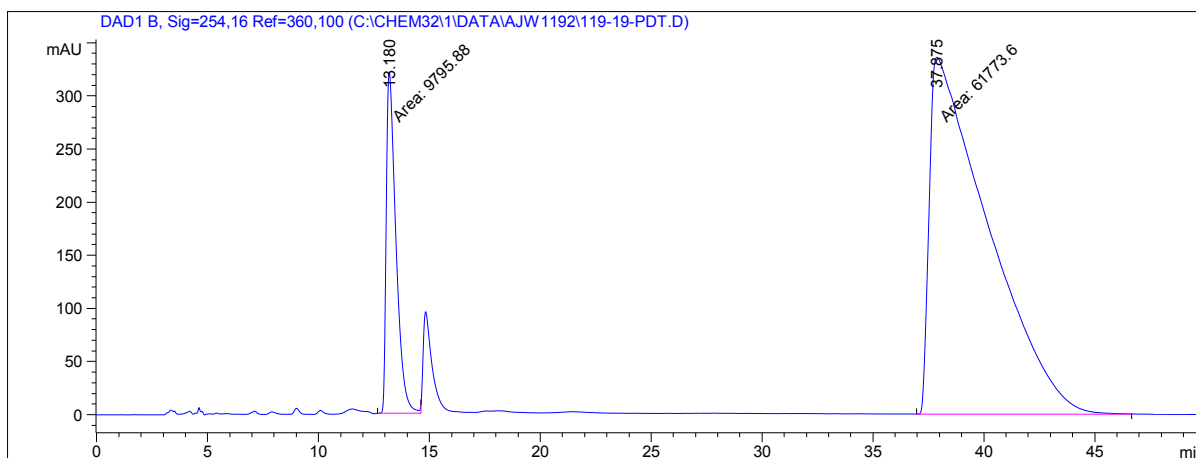

=====  
Area Percent Report  
=====

Sorted By : Signal  
Multiplier : 1.0000  
Dilution : 1.0000  
Use Multiplier & Dilution Factor with ISTDs

Signal 1: DAD1 B, Sig=254,16 Ref=360,100

| Peak # | RetTime [min] | Type | Width [min] | Area [mAU*s] | Height [mAU] | Area %  |
|--------|---------------|------|-------------|--------------|--------------|---------|
| 1      | 13.180        | MM   | 0.5087      | 9795.88379   | 320.95276    | 13.6872 |
| 2      | 37.875        | MM   | 3.0656      | 6.17736e4    | 335.84094    | 86.3128 |

Totals : 7.15695e4 656.79370

=====  
Summed Peaks Report  
=====

**Figure S.27. D-Ribose with Phe-I – Bz-Phe-II Chiral HPLC Assay**

Data File C:\CHEM32\1\DATA\AJW119\119-5-PDT.D  
Sample Name: 119-5-pdt

```
=====
Acq. Operator   : Alex                      Seq. Line : 14
Acq. Instrument : LC-MS                    Location  : Vial 25
Injection Date  : 10/8/2016 1:53:19 AM      Inj       : 1
                                           Inj Volume: 10 µl

Acq. Method     : C:\CHEM32\1\METHODS\COL1_HI_80_20_50MIN.M
Last changed    : 10/8/2016 1:52:27 AM by Alex
                 (modified after loading)

Analysis Method : C:\CHEM32\1\METHODS\COL1_OZ3_IODINATION2.M
Last changed    : 10/10/2016 5:38:03 PM by Neil
                 (modified after loading)
=====
```

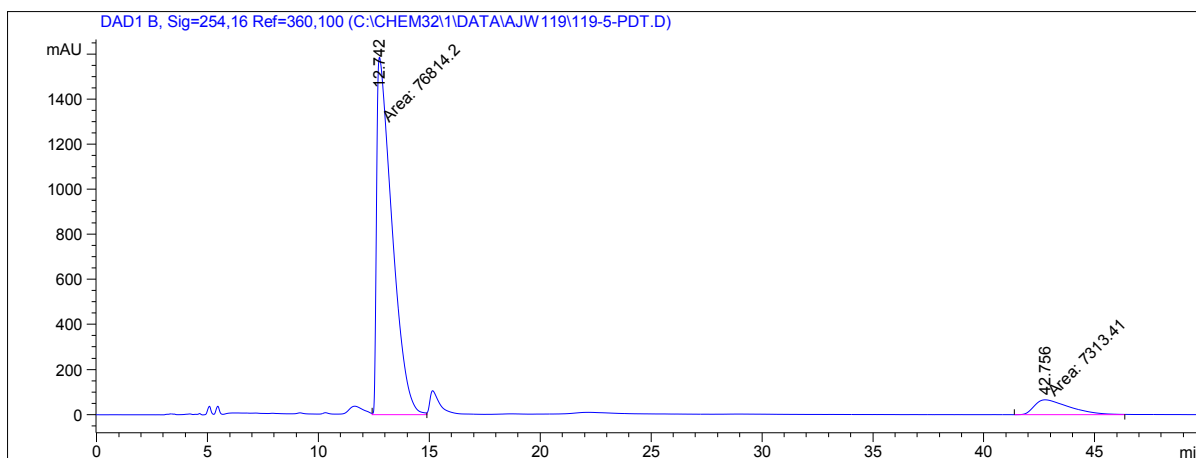

=====  
Area Percent Report  
=====

Sorted By : Signal  
Multiplier : 1.0000  
Dilution : 1.0000  
Use Multiplier & Dilution Factor with ISTDs

Signal 1: DAD1 B, Sig=254,16 Ref=360,100

| Peak # | RetTime [min] | Type | Width [min] | Area [mAU*s] | Height [mAU] | Area %  |
|--------|---------------|------|-------------|--------------|--------------|---------|
| 1      | 12.742        | MM   | 0.8072      | 7.68142e4    | 1585.94531   | 91.3068 |
| 2      | 42.756        | MM   | 1.8429      | 7313.40625   | 66.14054     | 8.6932  |

Totals : 8.41276e4 1652.08585

=====  
Summed Peaks Report  
=====

**Figure S.28. D-Lyxose with Phe-I – Bz-Phe-II Chiral HPLC Assay**

Data File C:\CHEM32\NH\161128\145-1-PDT.D  
Sample Name: 145-1-pdt

```
=====
Acq. Operator   : Neil                               Seq. Line : 19
Acq. Instrument : LC-MS                             Location  : Vial 16
Injection Date  : 11/28/2016 9:12:07 PM             Inj       : 1
                                                    Inj Volume: 10 µl

Acq. Method     : C:\CHEM32\1\METHODS\COL1_HI_80_20_40MIN.M
Last changed    : 11/28/2016 9:11:07 PM by Neil
                  (modified after loading)
Analysis Method : C:\CHEM32\1\METHODS\COL1_HI_80_20_30MIN.M
Last changed    : 11/29/2016 7:25:48 AM by Alex
                  (modified after loading)
=====
```

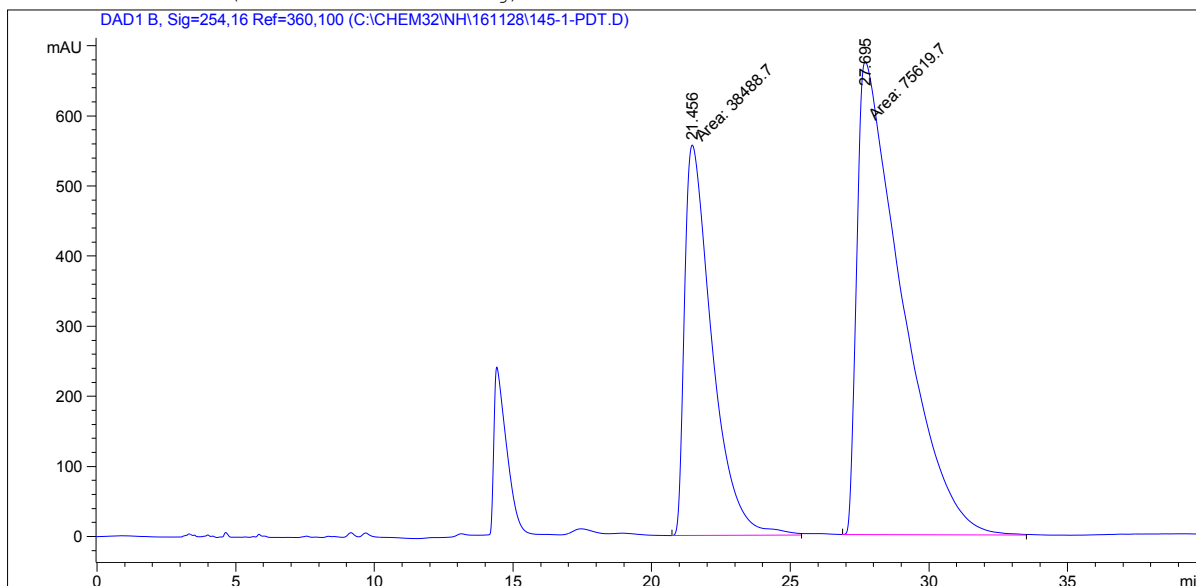

=====  
Area Percent Report  
=====

```
Sorted By      :      Signal
Multiplier     :      1.0000
Dilution       :      1.0000
Use Multiplier & Dilution Factor with ISTDs
```

Signal 1: DAD1 B, Sig=254,16 Ref=360,100

| Peak # | RetTime [min] | Type | Width [min] | Area [mAU*s] | Height [mAU] | Area %  |
|--------|---------------|------|-------------|--------------|--------------|---------|
| 1      | 21.456        | MM   | 1.1511      | 3.84887e4    | 557.26892    | 33.7299 |
| 2      | 27.695        | MM   | 1.8672      | 7.56197e4    | 674.97705    | 66.2701 |

Totals :                    1.14108e5  1232.24597

**Figure S.29. D-Ribose with Trp-I – Bz-Trp-II Chiral HPLC Assay**

Data File C:\CHEM32\NH\161128\145-2-PDT.D  
Sample Name: 145-2-pdt

```
=====
Acq. Operator   : Neil                               Seq. Line : 20
Acq. Instrument : LC-MS                             Location  : Vial 17
Injection Date  : 11/28/2016 9:53:26 PM             Inj       : 1
                                                    Inj Volume: 10 µl

Acq. Method     : C:\CHEM32\1\METHODS\C0L1_HI_80_20_40MIN.M
Last changed    : 11/28/2016 9:52:25 PM by Neil
                  (modified after loading)
Analysis Method : C:\CHEM32\1\METHODS\C0L1_HI_80_20_30MIN.M
Last changed    : 11/29/2016 7:27:19 AM by Alex
                  (modified after loading)
=====
```

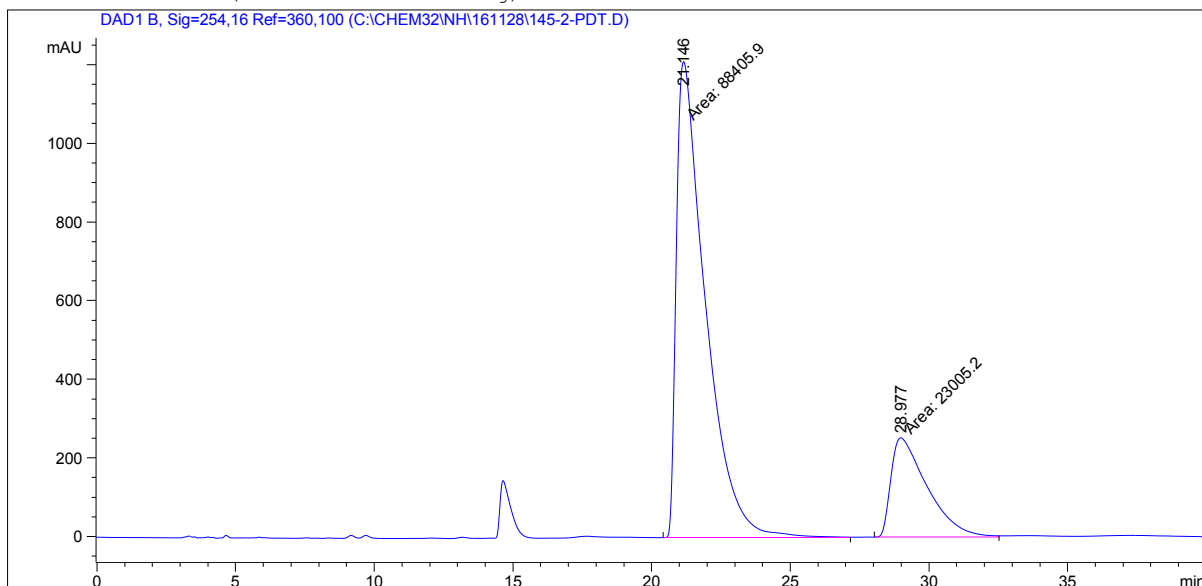

=====  
Area Percent Report  
=====

```
Sorted By      :      Signal
Multiplier     :      1.0000
Dilution       :      1.0000
Use Multiplier & Dilution Factor with ISTDs
```

Signal 1: DAD1 B, Sig=254,16 Ref=360,100

| Peak # | RetTime [min] | Type | Width [min] | Area [mAU*s] | Height [mAU] | Area %  |
|--------|---------------|------|-------------|--------------|--------------|---------|
| 1      | 21.146        | MM   | 1.2172      | 8.84059e4    | 1210.54565   | 79.3510 |
| 2      | 28.977        | MM   | 1.5161      | 2.30052e4    | 252.90536    | 20.6490 |

Totals :                                    1.11411e5  1463.45102

LC-MS 11/29/2016 7:28:12 AM Alex

Page 1 of 2

**Figure S.30. D-Lyxose with Trp-I – Bz-Trp-II Chiral HPLC Assay**

Data File C:\CHEM32\1\DATA\AJW119\119-4-PDT.D  
Sample Name: 119-4-pdt

```
=====
Acq. Operator   : Alex                      Seq. Line : 13
Acq. Instrument : LC-MS                    Location  : Vial 24
Injection Date  : 10/8/2016 1:02:04 AM      Inj       : 1
                                           Inj Volume: 10 µl

Acq. Method    : C:\CHEM32\1\METHODS\COL1_HI_80_20_50MIN.M
Last changed   : 10/8/2016 1:01:11 AM by Alex
                (modified after loading)

Analysis Method: C:\CHEM32\1\METHODS\COL1_OZ3_IODINATION2.M
Last changed   : 10/10/2016 5:35:44 PM by Neil
                (modified after loading)
=====
```

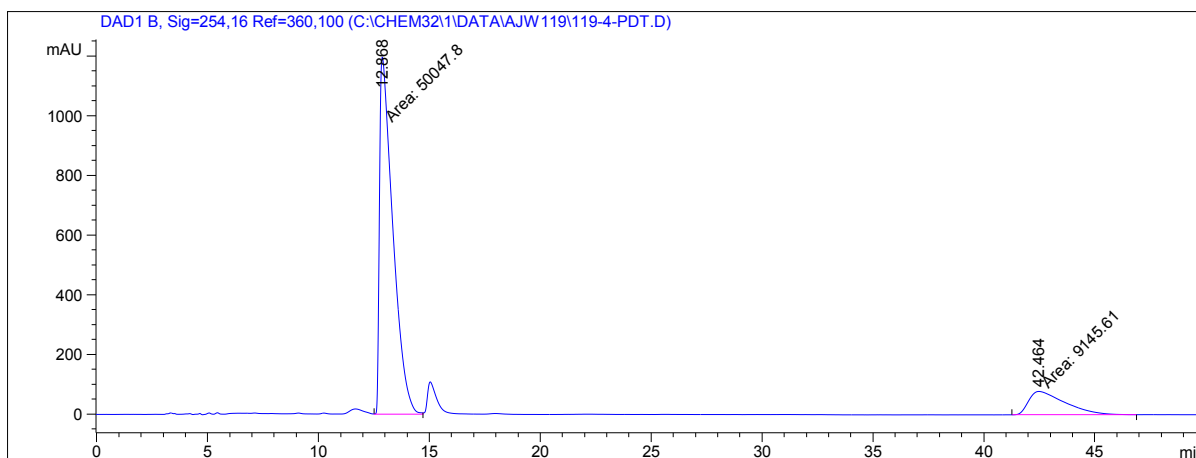

=====  
Area Percent Report  
=====

Sorted By : Signal  
Multiplier : 1.0000  
Dilution : 1.0000  
Use Multiplier & Dilution Factor with ISTDs

Signal 1: DAD1 B, Sig=254,16 Ref=360,100

| Peak # | RetTime [min] | Type | Width [min] | Area [mAU*s] | Height [mAU] | Area %  |
|--------|---------------|------|-------------|--------------|--------------|---------|
| 1      | 12.868        | MM   | 0.6971      | 5.00478e4    | 1196.56458   | 84.5496 |
| 2      | 42.464        | MM   | 1.9331      | 9145.61328   | 78.85239     | 15.4504 |

Totals : 5.91934e4 1275.41696

=====  
Summed Peaks Report  
=====

**Figure S.31. L-Ribose with Phe-I – Bz-Phe-II Chiral HPLC Assay**

Data File C:\CHEM32\1\DATA\AJW119\119-6-PDT.D  
Sample Name: 119-6-pdt

```
=====
Acq. Operator   : Alex                      Seq. Line : 15
Acq. Instrument : LC-MS                    Location  : Vial 26
Injection Date  : 10/8/2016 2:44:35 AM      Inj       : 1
                                           Inj Volume: 10 µl

Acq. Method     : C:\CHEM32\1\METHODS\COL1_HI_80_20_50MIN.M
Last changed    : 10/8/2016 2:43:43 AM by Alex
                 (modified after loading)

Analysis Method : C:\CHEM32\1\METHODS\COL1_OZ3_IODINATION2.M
Last changed    : 10/10/2016 5:40:50 PM by Neil
                 (modified after loading)
=====
```

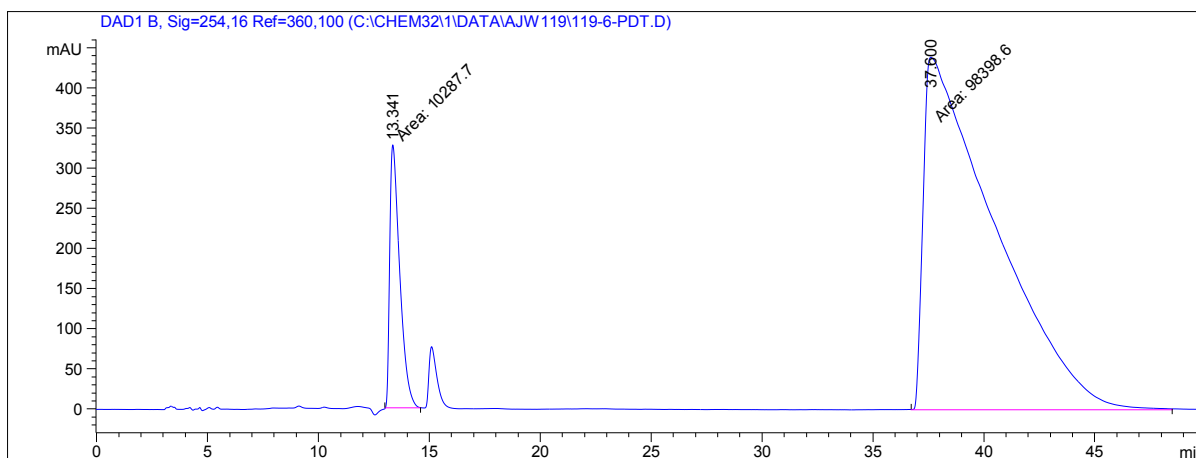

```
=====
                          Area Percent Report
=====
```

```
Sorted By      :      Signal
Multiplier     :      1.0000
Dilution       :      1.0000
Use Multiplier & Dilution Factor with ISTDs
```

Signal 1: DAD1 B, Sig=254,16 Ref=360,100

| Peak # | RetTime [min] | Type | Width [min] | Area [mAU*s] | Height [mAU] | Area %  |
|--------|---------------|------|-------------|--------------|--------------|---------|
| 1      | 13.341        | MM   | 0.5236      | 1.02877e4    | 327.46478    | 9.4655  |
| 2      | 37.600        | MM   | 3.7342      | 9.83986e4    | 439.17657    | 90.5345 |

Totals :                                    1.08686e5    766.64136

```
=====
                          Summed Peaks Report
=====
```

**Figure S.32. L-Lyxose with Phe-I – Bz-Phe-II Chiral HPLC Assay**

## 6. Kinetic Modeling

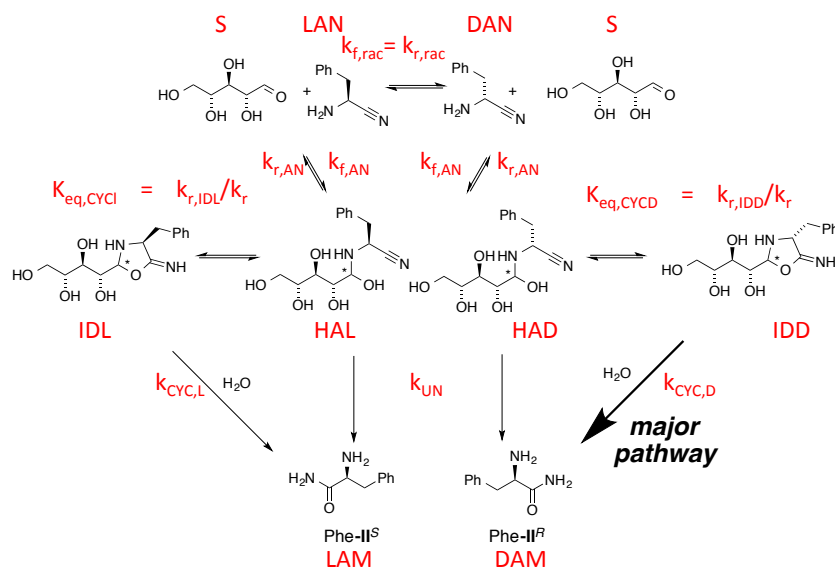

**Figure S.33. Reaction network of Figure 2.** The reaction network of Figure 2 in the manuscript is described by a set of elementary reactions given below. These equations are fit to the temporal experimental data for enantiomeric excess and conversion shown in Figure 1 using the CoPaSi program with the Levenberg-Marquardt method and an iteration limit = 2000 and tolerance =  $1 \times 10^6$ . The parameter designations used in the program are given in the scheme.

| # | ▲ | Name       | Reaction       | Rate Law                   |
|---|---|------------|----------------|----------------------------|
| 1 |   | reaction_1 | LAN + S = HAL  | Mass action (reversible)   |
| 2 |   | reaction_2 | DAN + S = HAD  | Mass action (reversible)   |
| 3 |   | reaction_3 | LAN = DAN      | Mass action (reversible)   |
| 4 |   | reaction_4 | HAL = IDL      | Mass action (reversible)   |
| 5 |   | reaction_5 | HAD = IDD      | Mass action (reversible)   |
| 6 |   | reaction_6 | HAL -> LAM + S | Mass action (irreversible) |
| 7 |   | reaction_7 | HAD -> DAM + S | Mass action (irreversible) |
| 8 |   | reaction_8 | IDL -> LAM + S | Mass action (irreversible) |
| 9 |   | reaction_9 | IDD -> DAM + S | Mass action (irreversible) |

Rate constants returned in the simulation:

Rxn 1, Rxn 2:  $k_{f,AN} = 2.41 \text{ e-}03 \text{ M}^{-1}\text{hr}^{-1}$ ;  $k_{r,AN} = 9.34 \text{ e-}03 \text{ hr}^{-1}$ ;

Rxn 3:  $k_{f,rac} = k_{r,rac} = 1 \text{ e+}02 \text{ hr}^{-1}$

Rxn 4:  $k_{f,IDL} = 7 \text{ e-}02 \text{ hr}^{-1}$ ;  $k_r = 1.03 \text{ e-}02 \text{ hr}^{-1}$ ;

Rxn 5:  $k_{f,IDD} = 6 \text{ e-}01 \text{ hr}^{-1}$ ;  $k_r = 1.03 \text{ e-}02 \text{ hr}^{-1}$ ;

Rxn 6, Rxn 7:  $k_{UN} = 2.03 \text{ e-}03 \text{ hr}^{-1}$ ;

Rxn 8:  $k_{CYC,D} = 2.79 \text{ e-}03 \text{ hr}^{-1}$ ;

Rxn 9:  $k_{CYC,L} = 5.66 \text{ e-}06 \text{ hr}^{-1}$

$K_{eq,CYCL} = 6.74 \text{ kcal/mol}$

$K_{eq,CYCD} = 58.8 \text{ kcal/mol}$

$\Delta\Delta G = 2.15 \text{ kcal/mol}$

**Figure S.34. Elementary reaction steps and rate constants returned by the model**

## 7. Preliminary NMR Spectroscopy Studies

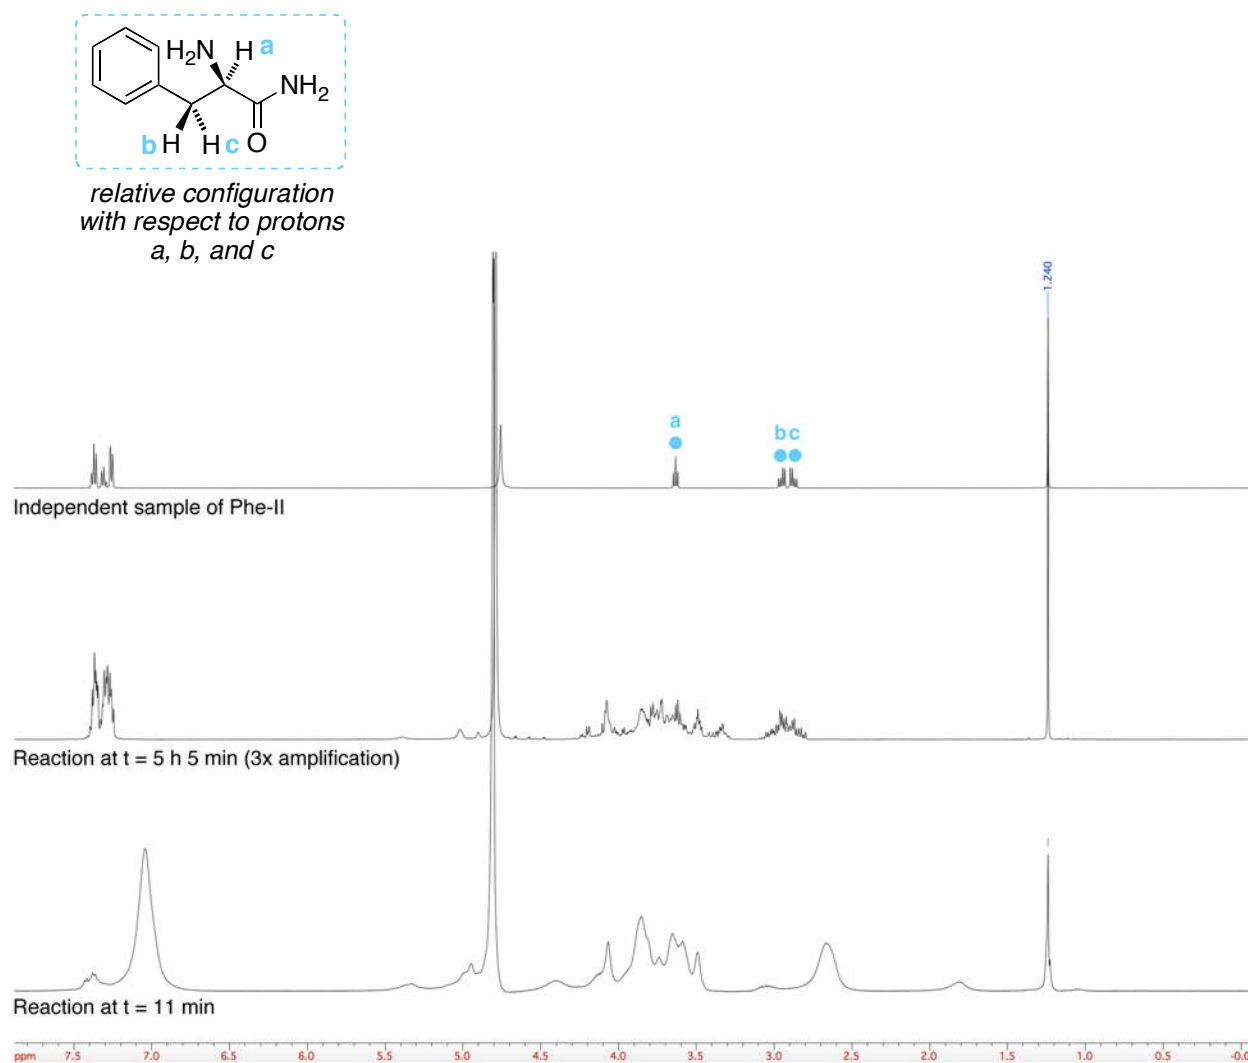

**Figure S.35.** <sup>1</sup>H NMR spectra of reaction at t = 11 min and t = 5 h 5 min compared to Phe-**II**. Comparison of <sup>1</sup>H NMR spectra of the reaction at t = 11 min with t = 5 h 5 min did not immediately provide useful information. The reaction spectra at t = 5 h 5 min shows protons in the appropriate region of the diastereotopic protons **b** and **c** present on Phe-**II**.



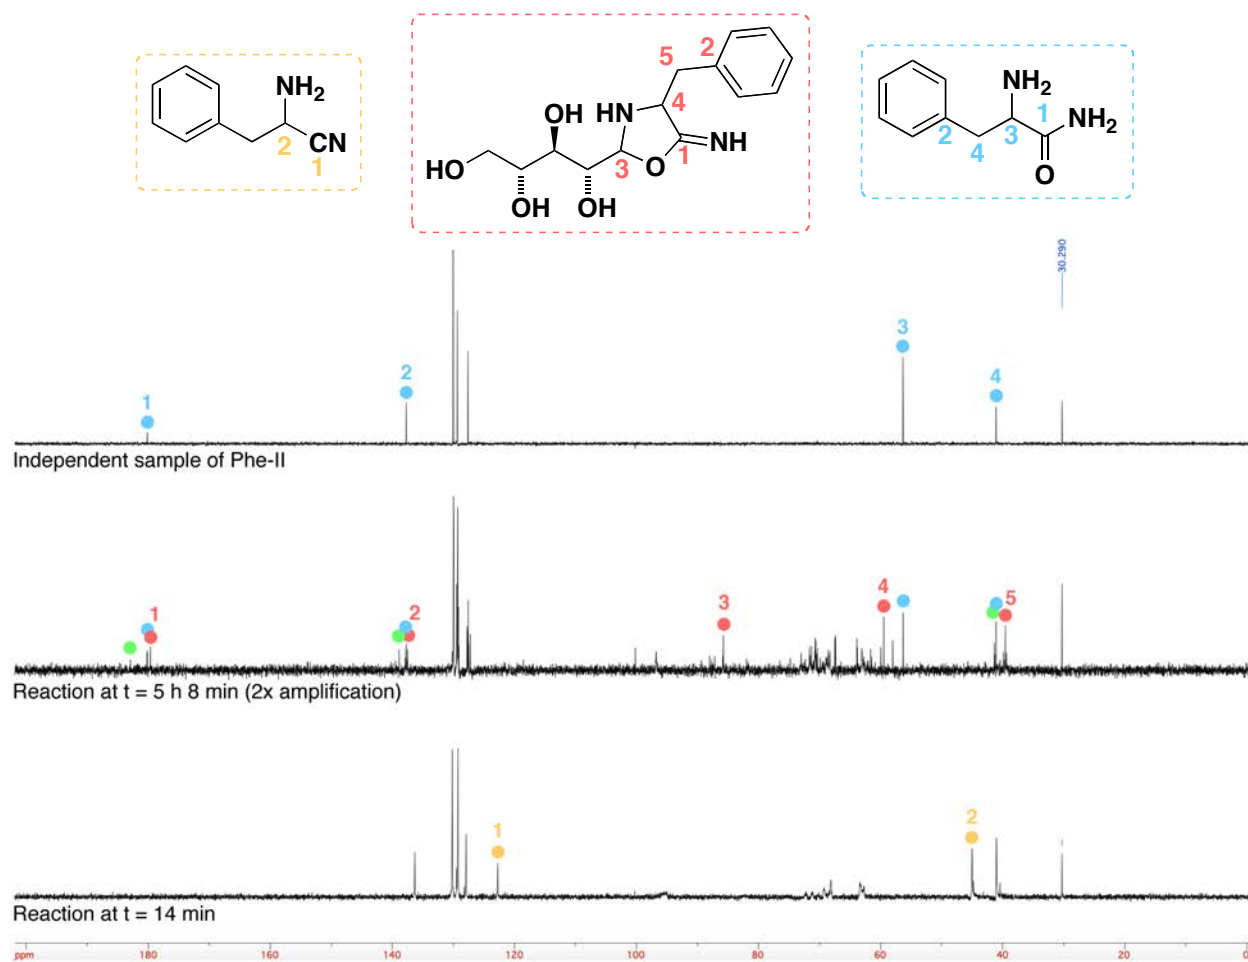

**Figure S.36.**  $^{13}\text{C}$  NMR spectra of reaction at t = 14 min and t = 5 h 8 min compared to Phe-II showing consumption of Phe-I. Apparent formation of two distinct species containing carbons with similar chemical shifts as carbon 1 and carbon 2 of Phe-II is noted by the green and red dots respectively. The red species contains the carbon scaffold of Phe-I as shown, but it also appears to have a covalently bound carbon that falls at the appropriate chemical shift for what is labeled as carbon 3 on hypothesized intermediate CYC. HMBC correlations were utilized to determine carbons present on the green species and the red species (Figs. S.37, S.38).

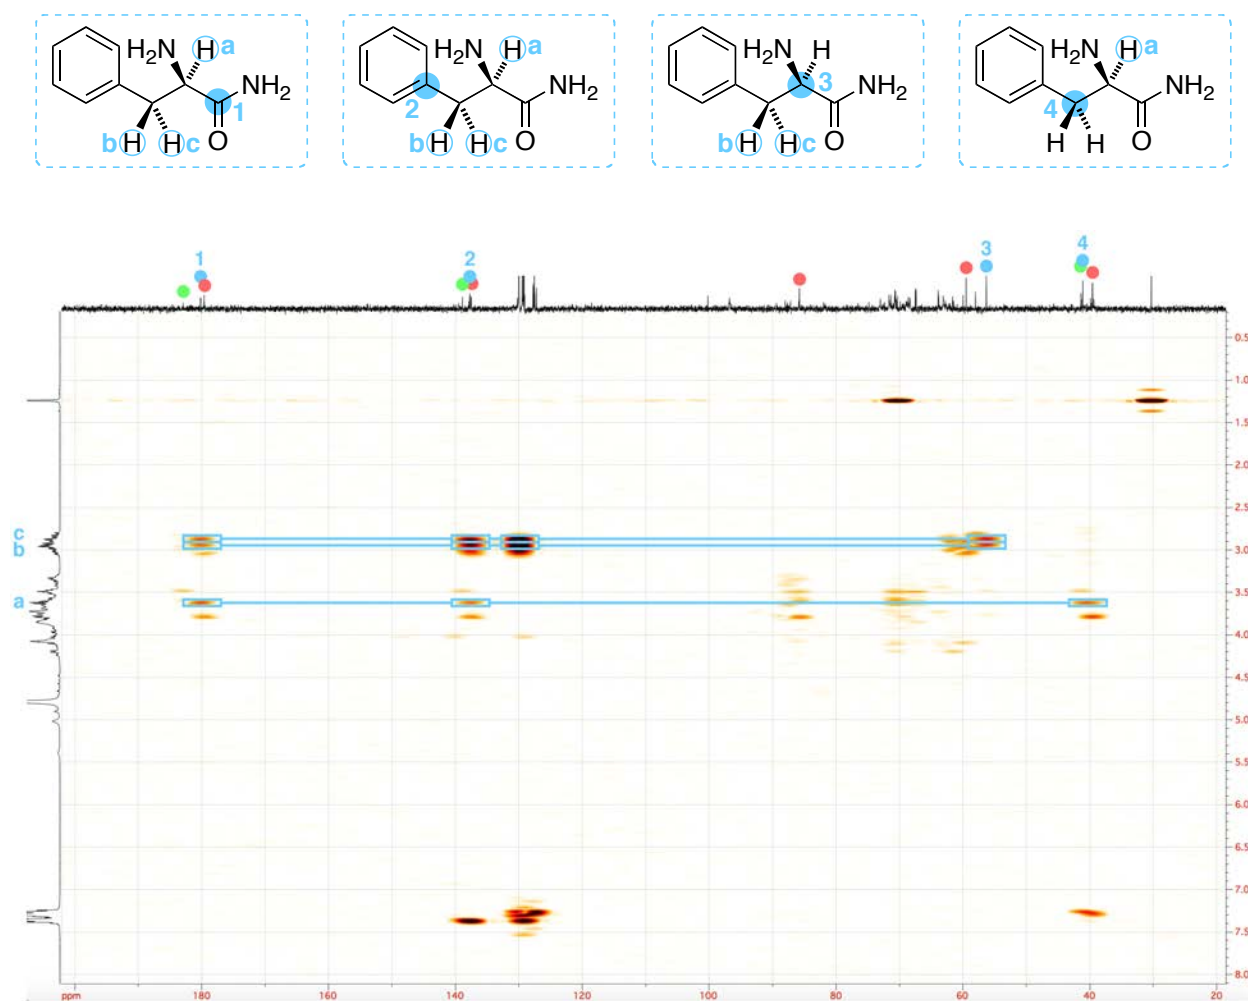

**Figure S.37.** HMBC of the reaction at  $t = 5$  h 26 min. Correlations for carbons 1-4 with protons **a-c** of the product Phe-**II** are shown in blue boxes. Lines are drawn between boxes for clarity. Carbonyl carbon 1 shows correlation with protons **a**, **b**, and **c**. Carbon 2 similarly shows correlation with protons **a**, **b**, and **c**. Carbon 3 shows correlations to protons **b** and **c** on the adjacent methylene. Carbon 4 shows correlations to proton **a** on the adjacent carbon.

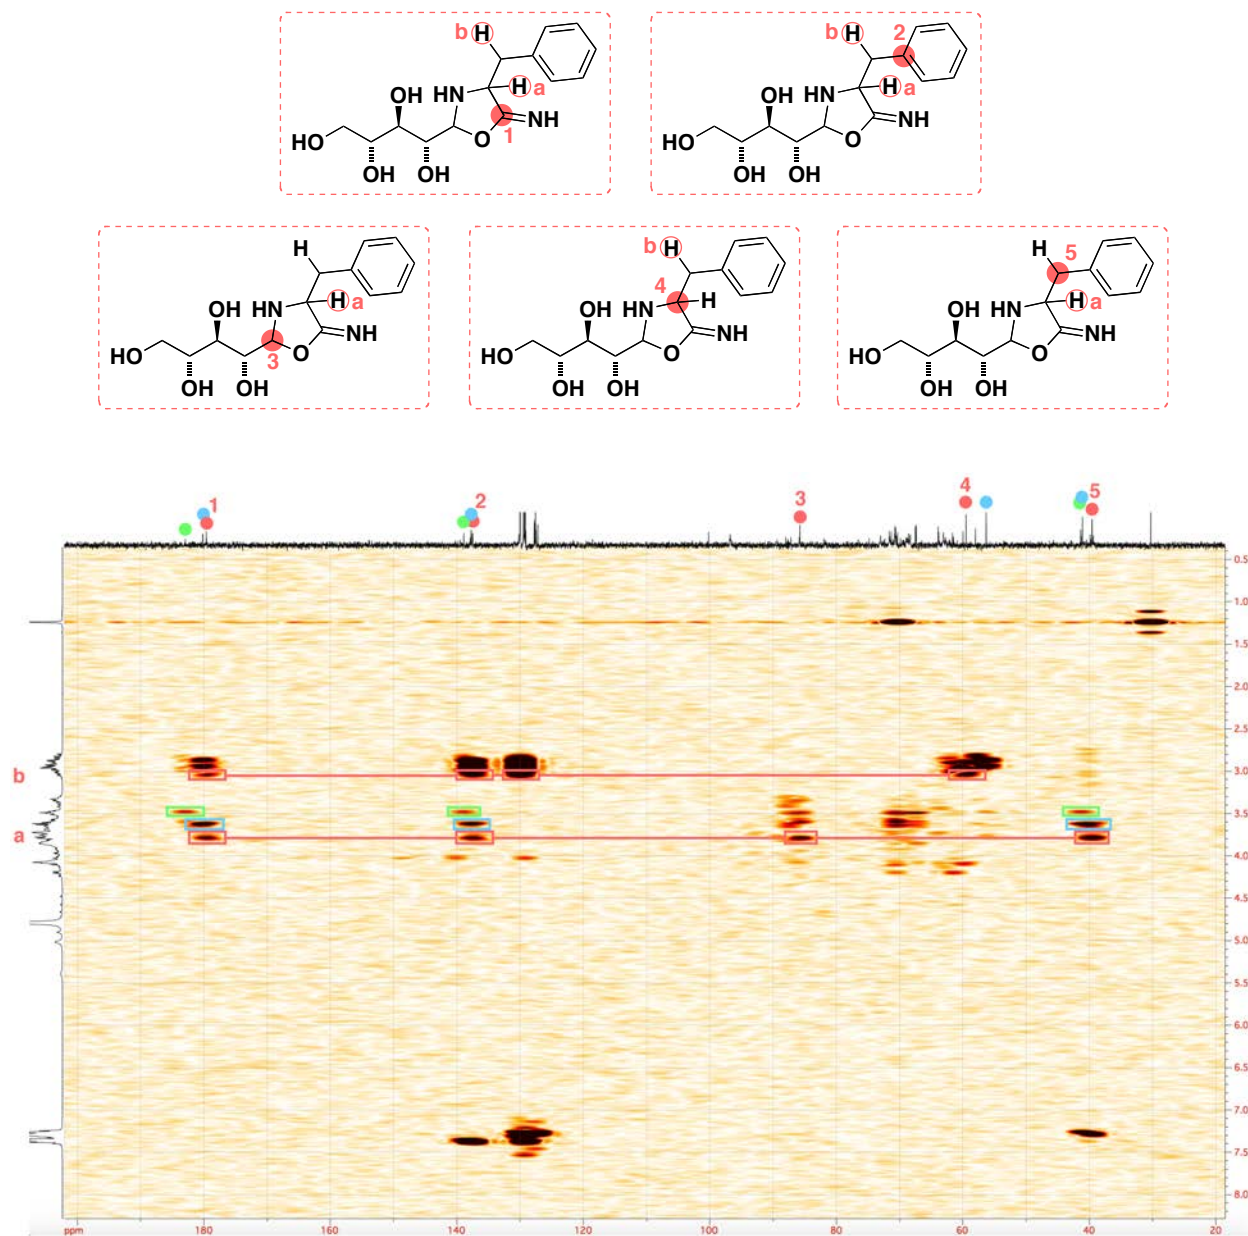

**Figure S.38.** HMBC of the reaction at  $t = 5$  h 26 min. Correlations for carbons 1-5 with protons **a** and **b** of the red species are shown in red boxes. Both carbon 1 and carbon 2 show correlations with protons **a** and **b**. Carbon 4 shows correlation with proton **b** and carbon 5 shows correlation with proton **a**. All of these patterns match the carbon framework of Phe-**II**, which indicates that the core structure is present on the red species. Carbon 3 shows correlation with proton **a**. This indicates connection of the carbon framework of Phe-**II** to another molecule. The chemical shift of carbon 3 is also consistent with the proposed structure (N and O bound to 3).

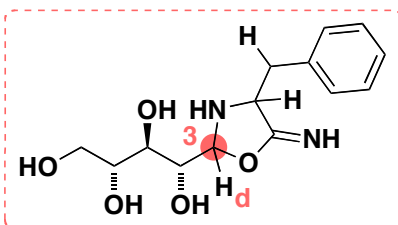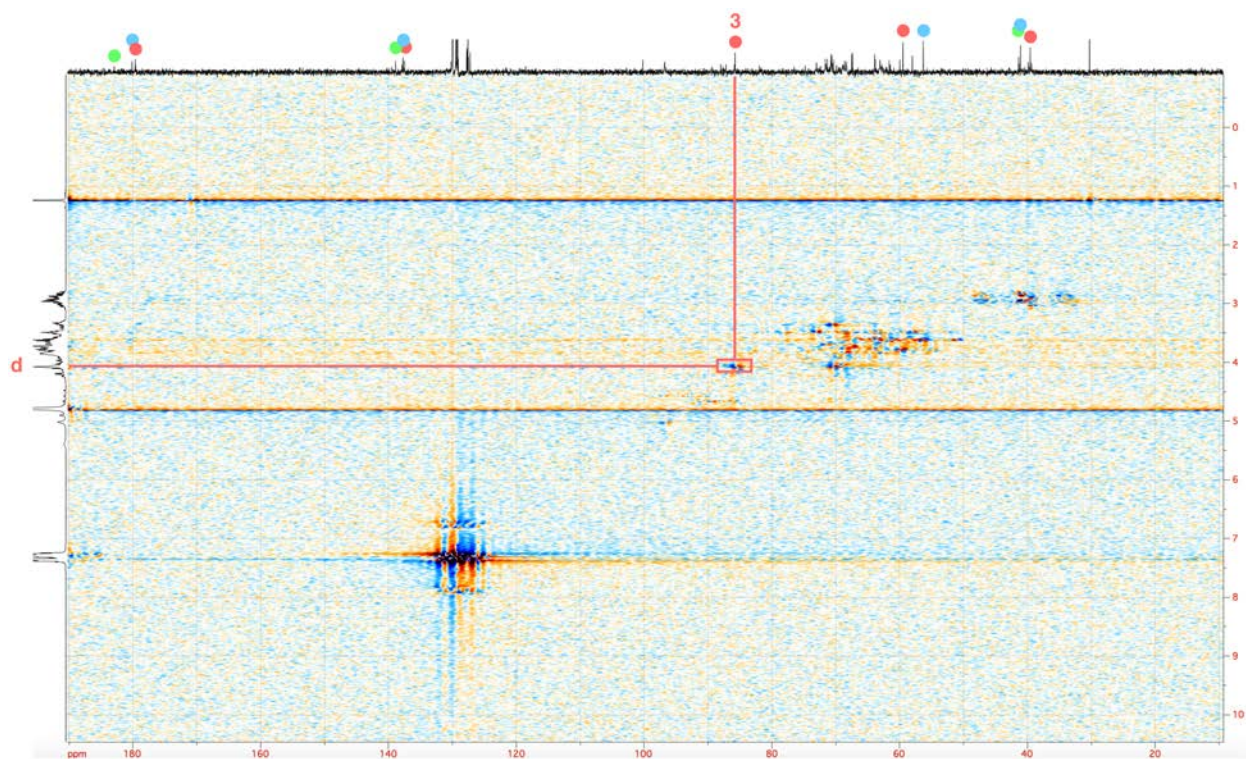

**Figure S.39.** HSQC of the reaction mixture at 5 h 23 min. Correlations for carbons 3 with proton **d** of the red species is shown in a red box. Lines are drawn between the box for clarity.

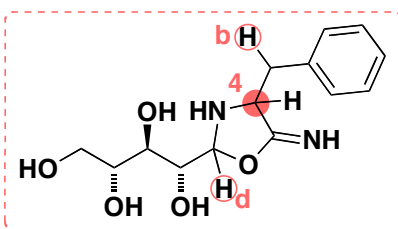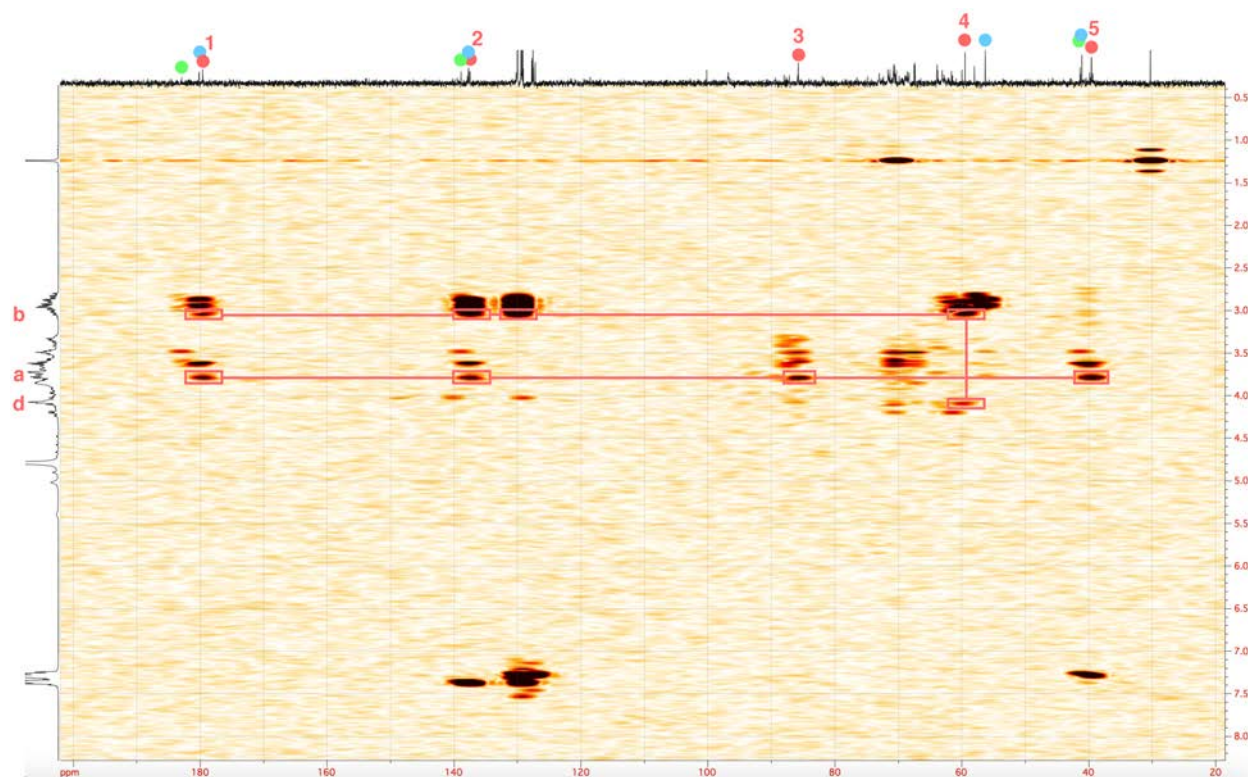

**Figure S.40.** HMBC of the reaction at  $t = 5$  h 26 min. Correlations for carbons 1-5 with protons **a**, **b**, and **d** of the red species are shown in red boxes. Updated correlations for carbon 4 with protons **b** and **d** of the red species are also shown. Carbon 4 shows correlations with proton **b** and proton **d**, providing additional evidence of a covalent linkage between the carbon framework contained in Phe-II and a carbon (carbon 3). Lines are drawn between boxes for clarity.

## 8. Computational Procedures and Results

### Procedures for Computational Calculations in Table 5 and Figure 3

There are four families of hemiaminal intermediates **III** and cyclic intermediates **IV** (Scheme S.1) defined by the configurations of the stereocenters. The following designations are used:

- **RR** family: *R*-amino nitrile and *R*-carbon atom bearing hydroxy-group in hemiaminal motif.
- **RS** family: *R*-amino nitrile and *S*-carbon atom bearing hydroxy-group in hemiaminal motif.
- **SR** family: *S*-amino nitrile and *R*-carbon atom bearing hydroxy-group in hemiaminal motif.
- **SS** family: *S*-amino nitrile and *S*-carbon atom bearing hydroxy-group in hemiaminal motif.

Computational analysis was performed for phenylalanine aminonitrile and D-ribose. We characterized conformational landscapes of four families of hemiaminal intermediates **III** and corresponding cyclic intermediates **IV**, and performed a transition state search for the intramolecular cyclization of the deprotonated hemiaminals **ADD** (Figure 2).

The first stage of the conformational analysis included Monte Carlo sampling using classical force-fields and implicit solvent models of water as implemented in BOSS and MAESTRO software.<sup>5-8</sup> Specifically, we used Optimized Potentials for Liquid Simulations - All Atom (OPLS-AA) force-field<sup>9,10</sup> in combination with Generalized Born/Surface Area (GB/SA) implicit solvent model for water.<sup>11</sup> Atomic charges for the classical force-field runs were obtained from AM1 semiempirical calculations.<sup>12</sup>

The second stage of the conformational analysis included refinement of the sampled conformational landscapes using density functional theory (DFT) as implemented in Gaussian 09 software.<sup>13</sup> Geometries were re-optimized at M062X/6-31+G\* level of theory. M062X<sup>14</sup> is a global hybrid density functional that ensures adequate treatment of non-covalent interactions, such as hydrogen bonding and cation- $\pi$  interactions, that are expected to contribute to the stabilization of hemiaminals formed from phenylalanine aminonitrile and sugars. We used Self-Consistent Reaction Field (SCRF) continuum model of water implemented as Solvation Model based on Density (SMD).<sup>15</sup> Convergence of optimization to the local minima was confirmed via normal mode analysis. We used the same level of theory and standard methods of transition state optimization implemented in Gaussian 09<sup>13,16,17</sup> followed by normal mode analysis to identify and validate transition states of intramolecular cyclization of the deprotonated hemiaminals **ADD**.

Conformational sampling of the torsional degrees of freedom in hemiaminal intermediate **III** was performed with BOSS software; refined structures were used to generate transition states and cyclic intermediates **IV**. MAESTRO software has a capability for mixed torsional/low-mode sampling suitable for ring conformations and was used to sample conformational landscape of cyclic intermediate **IV**; refined structures were used to generate transition states and hemiaminal intermediates **III**. Structural motifs associated with low-energy conformers in the samples were used to manually generate ~10 conformers that were added to the sample. Overall, we characterized 330 conformers of the neutral hemiaminal intermediate **III**, 220 anionic transition states for the intramolecular cyclization of **ADD** (Figure 2), and 211 cyclic intermediates **IV**.

Results from the computational studies are included in Figures S.41-S.48.

**Scheme S.1.** Strecker amino acid synthesis directed by chiral carbonyl catalyst. Hemiaminal intermediate **III** is a protonated counterpart of hemiaminals **ADD** (Figure 2). Stereocenters are labeled with stars. The inset shows definition of the dihedral angle  $Dh_{cyc}$  between C-CN and C-OH bonds involved in hemiaminal cyclization;  $Dh_{cyc}$  serves as a measure of geometric favorability of the reaction.

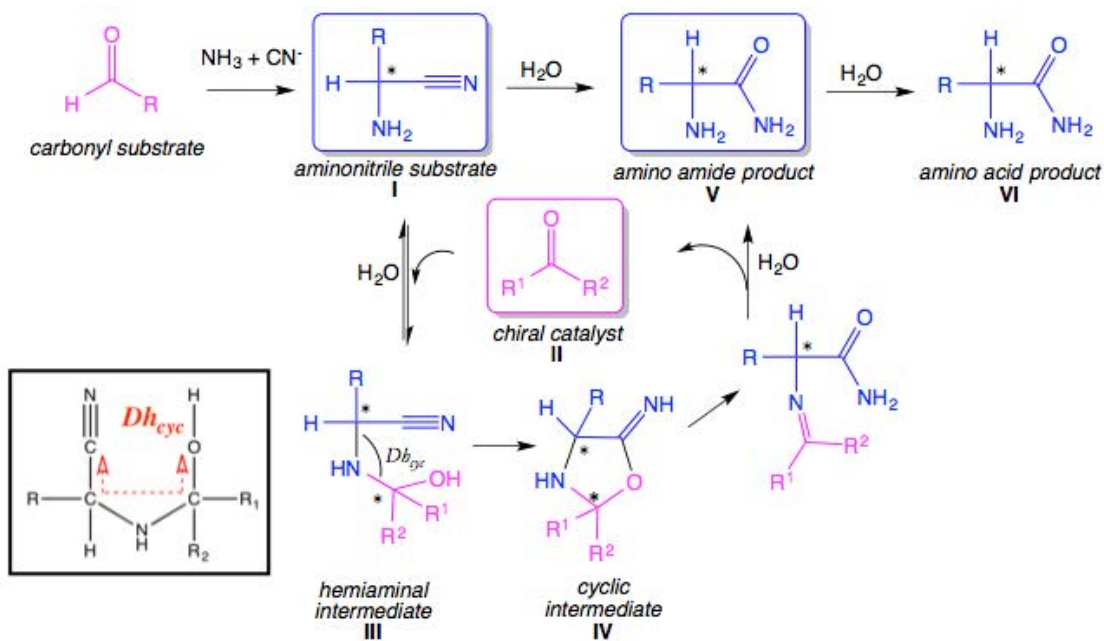

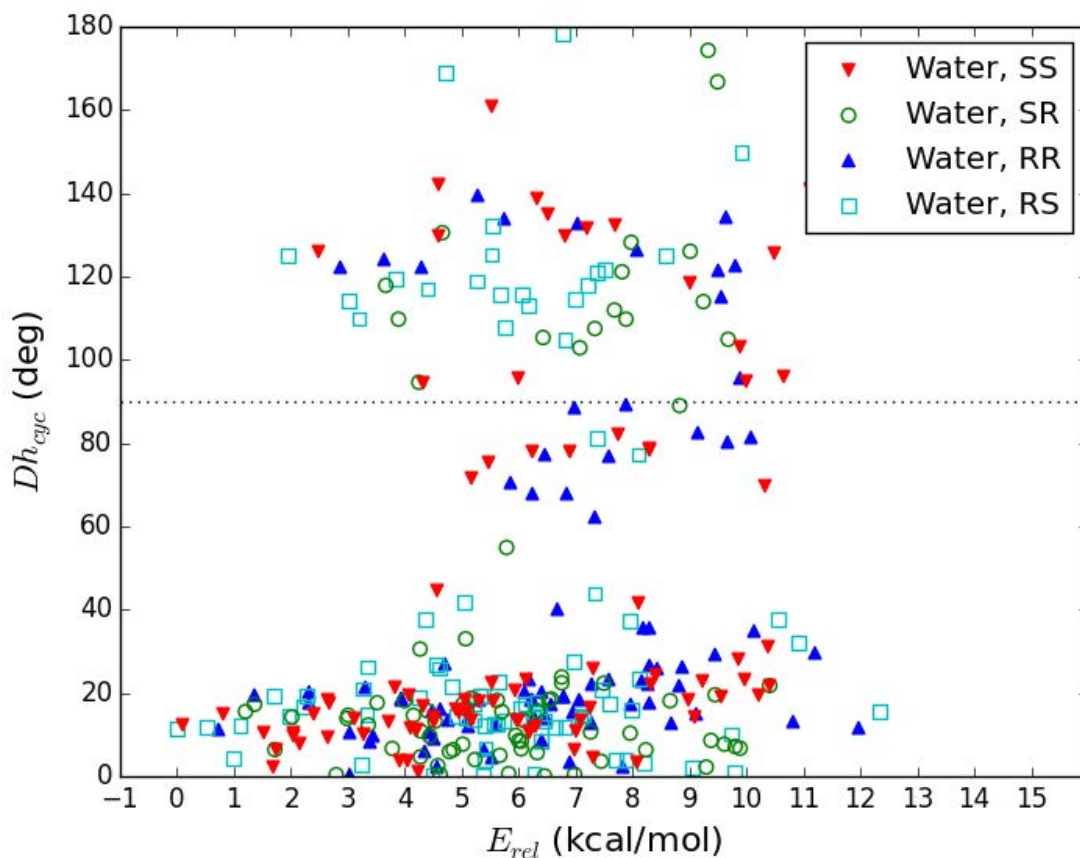

**Figure S.41.** Results of the conformational analysis for hemiaminal intermediate **III** in water. Dihedral angle  $Dh_{cyc}$  is plotted against relative energies  $E_{rel}$ . Zero corresponds to the energy of the most stable conformation in *RS* family. Conformers with  $Dh_{cyc}$  exceeding 90 deg have unfavorable arrangement of nitrile and hydroxyl groups within hemiaminal motif and cannot undergo intramolecular cyclization. They are considered non-reactive in the intramolecular cyclization leading to the indirect hydration of aminonitrile.



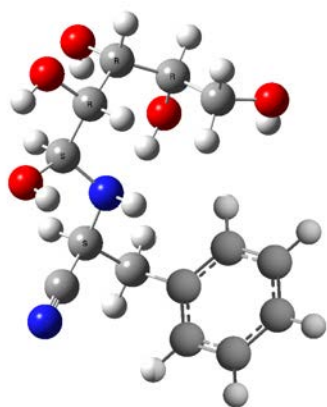

$SS E_{rel} = 0.1 \text{ kcal/mol}$

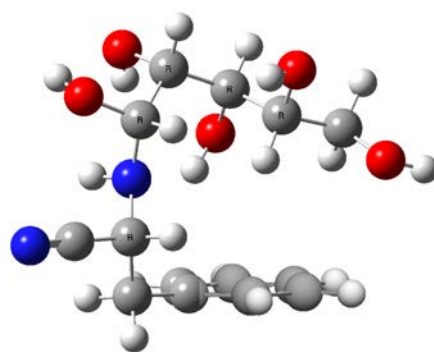

$RR E_{rel} = 0.7 \text{ kcal/mol}$

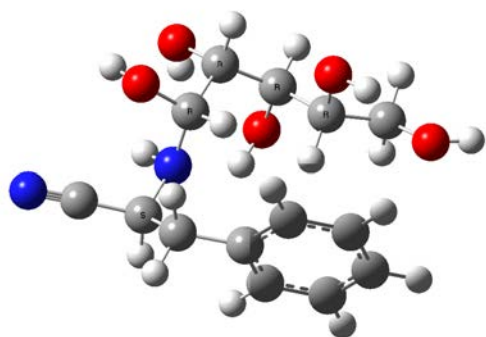

$SR E_{rel} = 1.2 \text{ kcal/mol}$

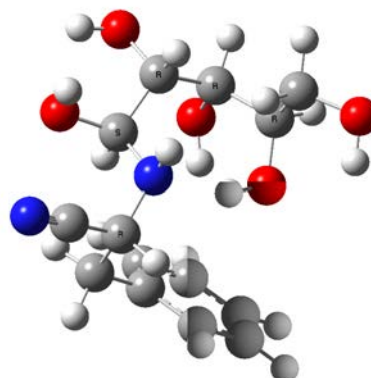

$RS E_{rel} = 0.0 \text{ kcal/mol}$

**Figure S.42.** The most stable conformations in each of four families of hemiaminal intermediate **III** and their relative potential energies.

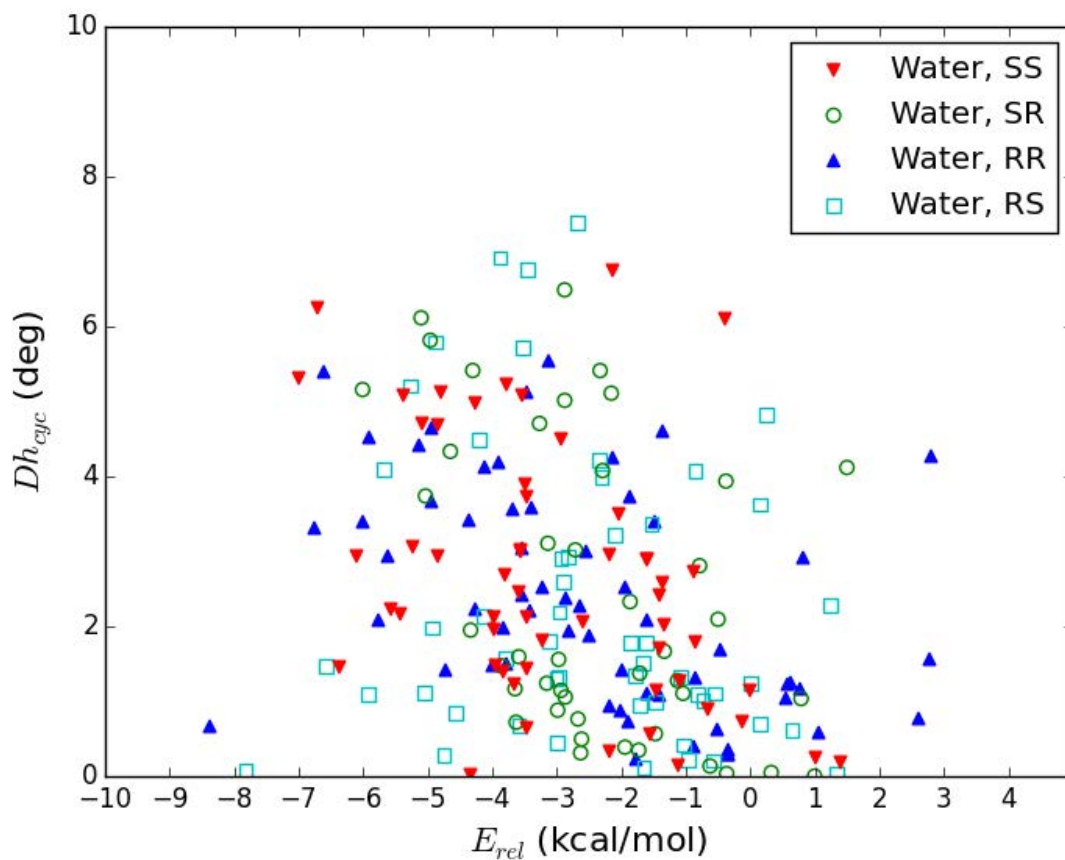

**Figure S.43.** Results of the conformational analysis for cyclic intermediate **IV** in water. Dihedral angle  $Dh_{cyc}$  is plotted against relative energies  $E_{rel}$ . Zero corresponds to the energy of the most stable conformation of hemiaminal intermediate **III** in *RS* family (see Figure S.41). In cyclic intermediates  $Dh_{cyc}$  characterizes conformation of the formed ring.

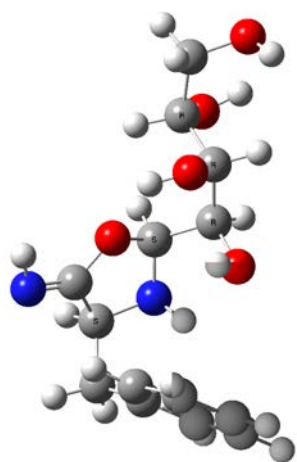

$SS E_{\text{rel}} = -7.0 \text{ kcal/mol}$

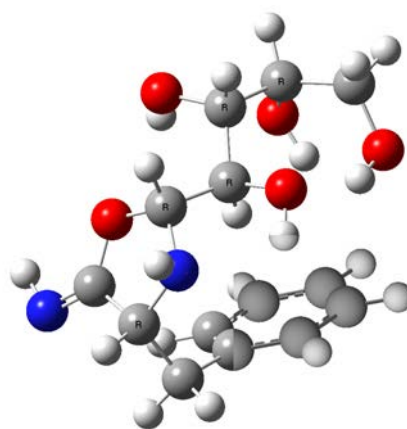

$RR E_{\text{rel}} = -8.4 \text{ kcal/mol}$

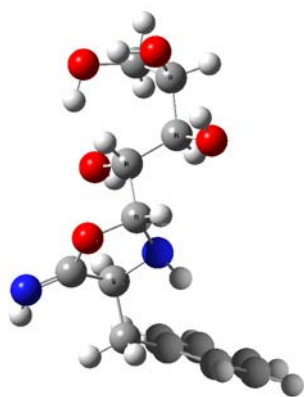

$SR E_{\text{rel}} = -6.0 \text{ kcal/mol}$

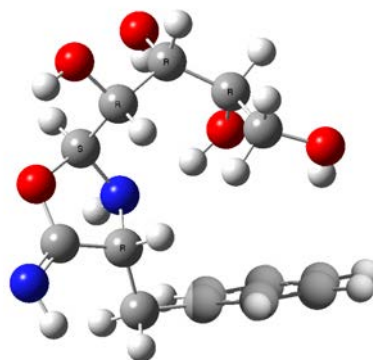

$RS E_{\text{rel}} = -7.8 \text{ kcal/mol}$

**Figure S.44.** The most stable conformations in each of four families of cyclic intermediate **IV** and their relative potential energies.

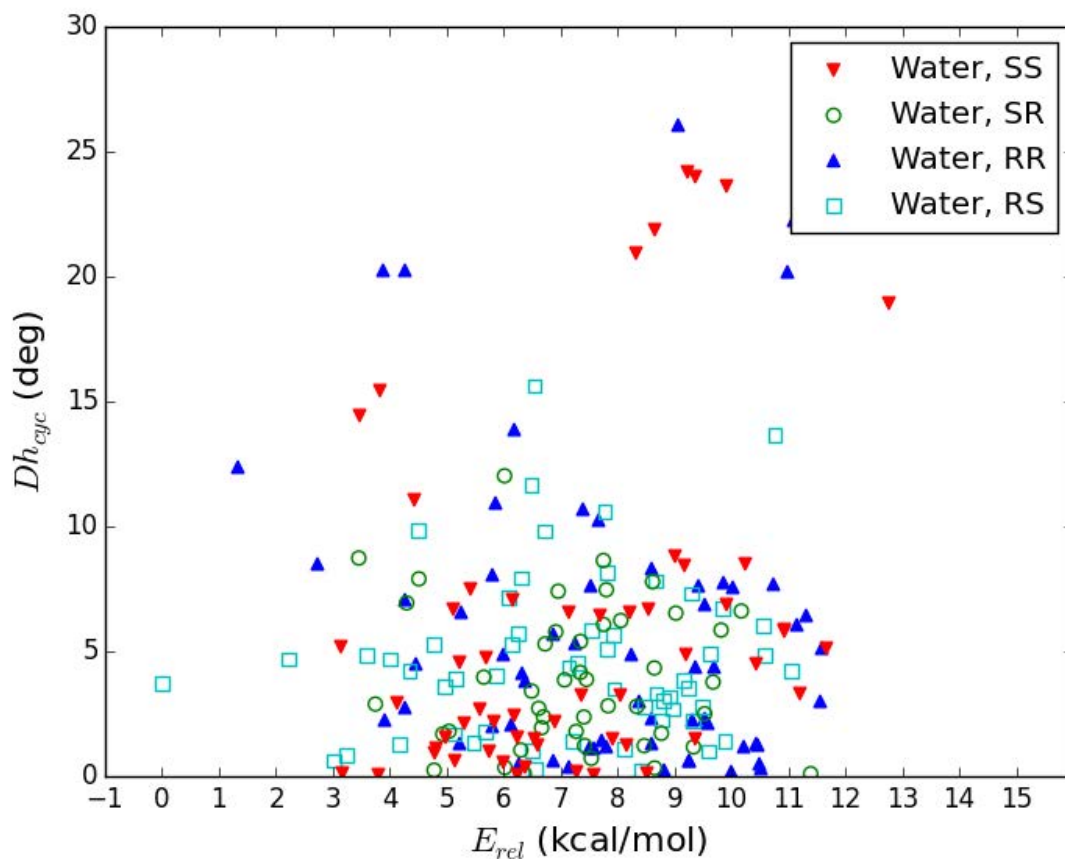

**Figure S.45.** Results of the transition state search for the intramolecular cyclization of deprotonated hemiaminal intermediate **ADD**. Dihedral angle  $Dh_{cyc}$  is plotted against relative energies  $E_{rel}$  of transition states. Zero corresponds to the energy of the lowest transition state in **RS** family. In transition states of the intramolecular cyclization  $Dh_{cyc}$  characterizes conformation of the forming ring.

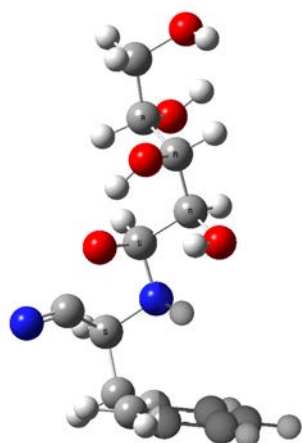

$SS E_{rel} = 3.1 \text{ kcal/mol}$

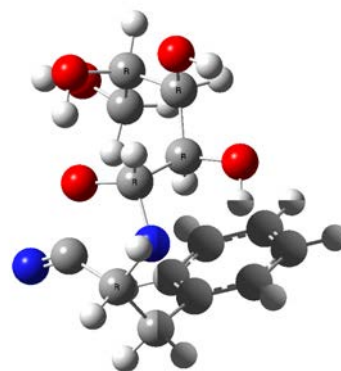

$RR E_{rel} = 1.3 \text{ kcal/mol}$

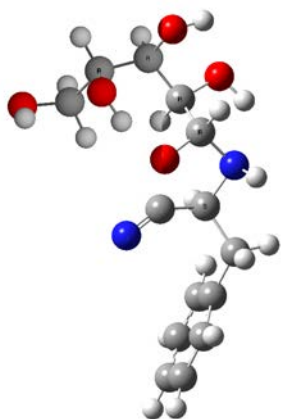

$SR E_{rel} = 3.5 \text{ kcal/mol}$

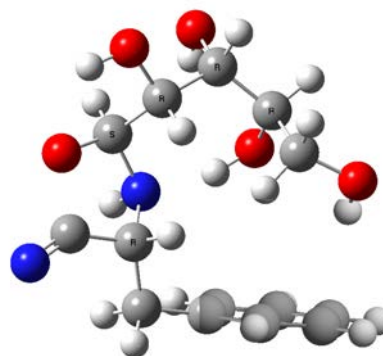

$RS E_{rel} = 0.0 \text{ kcal/mol}$

**Figure S.46.** The lowest transition states for intramolecular cyclization of deprotonated hemiaminal intermediate **ADD** and their relative potential energies. The relative energies are not directly comparable with relative energies in Figures S.42 and S.44 because of different stoichiometry of anionic transition states and neutral intermediates **III** and **IV**.

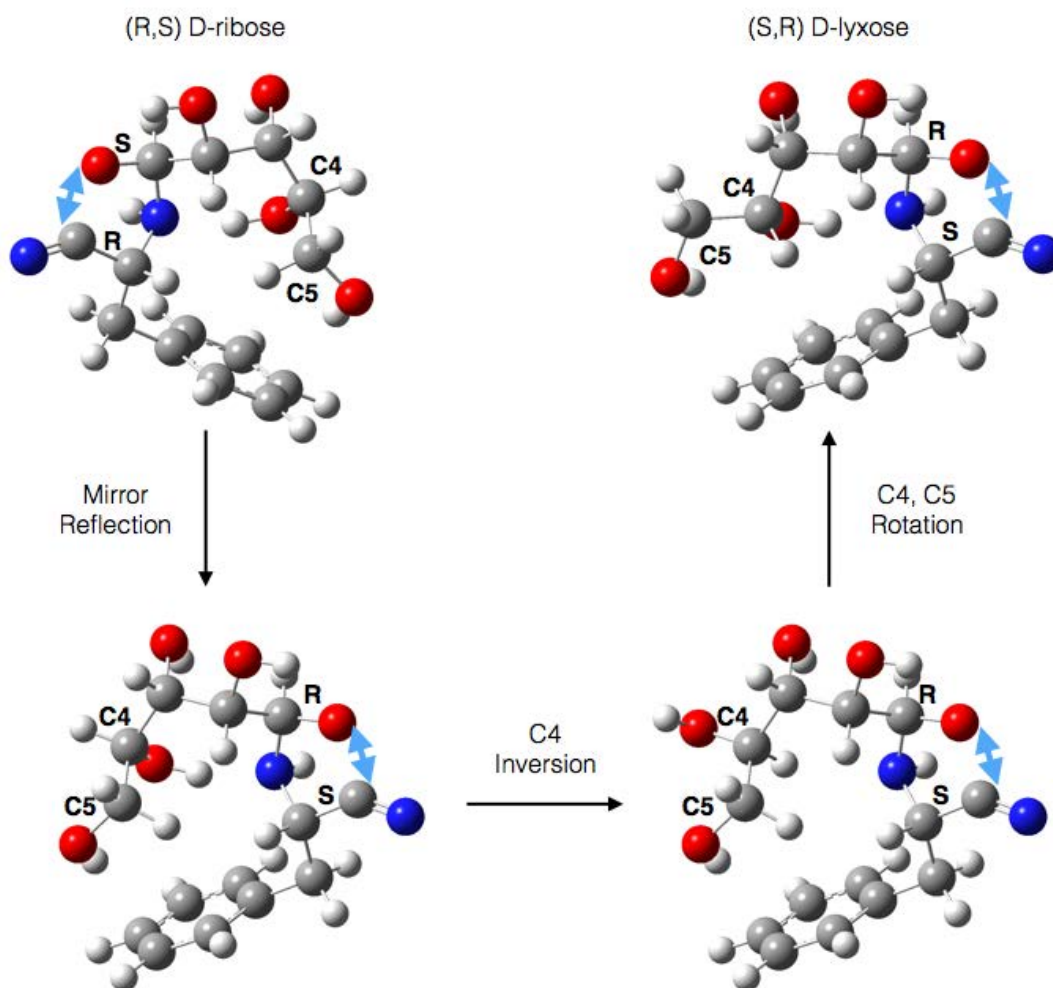

**Figure S.47.** Symmetry operations demonstrating the pseudo-enantiomeric character of the transition states for cyclization of (*R,S*) D-ribose and (*S,R*) D-lyxose with **Phe-I**, starting from the lowest transition state of the ribose **ADD<sup>R</sup>** anionic hemiaminal. Light blue arrow shows O-C distance for attack of carbonyl oxygen on nitrile carbon. These operations connect ground state conformations of (*R,S*) D-ribose and (*S,R*) D-lyxose with **Phe-I** as well as transition states. Conformational adjustment of hydroxyls at C4 and/or C5 via rotations at the last stage ensures recovery of the pattern of intramolecular interactions at these centers comparable to D-ribose counterpart.

| Family (D-ribose) | $\Delta G^\ddagger$ (kcal/mol) | Family (D-lyxose) | $\Delta G^\ddagger$ (kcal/mol) |
|-------------------|--------------------------------|-------------------|--------------------------------|
| <i>SS</i>         | 3.2                            | <i>RR</i>         | 4.5                            |
| <i>SR</i>         | 3.9                            | <i>RS</i>         | 4.8                            |
| <i>RR</i>         | 3.9                            | <i>SS</i>         | 3.9                            |
| <i>RS</i>         | 1.1                            | <i>SR</i>         | 3.2                            |

**Figure S.48.** The lowest *free energy barriers* for intramolecular cyclization of **ADD** anionic hemiaminal for D-ribose and D-lyxose. Barriers for D-lyxose are obtained from D-ribose data using pseudoenantiomeric relationships described above: (*S,S*) D-ribose maps onto (*R,R*) D-lyxose, (*S,R*) D-ribose to (*S,R*) D-lyxose, (*R,R*) D-ribose to (*S,S*) D-lyxose, and (*S,R*) D-ribose to (*R,S*) D-lyxose. The barriers are computed as differences between free energies of isolated deprotonated transition state (Figure S.46) and water molecule and isolated protonated hemiaminal intermediate **III** (Figure S.42) and hydroxyl anion. The source of free energies is thermochemical module of Gaussian 09 software.

## 9. References

### Synthesis

- 1 Mai, K.; Patil, G. Facile synthesis of  $\alpha$ -aminonitriles. *Tetrahedron Lett.* **1984**, *25*, 4583–4586.
- 2 Lagriffoul, P.-H.; Tadros, Z.; Taillades, J.; Commeyras, A. Influence of a hydroalcoholic solvent on the enantioselectivity of  $\alpha$ -aminonitrile hydration catalysed by chiral ketones. *J. Chem. Soc. Perkin Trans. 2* **1992**, 1279–1285.
- 3 Younai, A.; Zeng, B.-S.; Meltzer, H. Y.; Scheidt, K. A. Enantioselective syntheses of heteroyohimbine natural products: a unified approach through cooperative catalysis. *Angew. Chem. Int. Ed.* **2015**, *54*, 6900–6904.

### Kinetic Modeling

- 4 Hoops, S.; Sahle, S.; Gauges, R.; Lee, C.; Pahle, J.; Simus, N.; Singhal, M.; Xu, L.; Mendes, P.; Kummer, U. COPASI—a COMplex PATHway SIMulator. *Bioinformatics* **2006**, *22*, 3067–3074.

### Computational Software employed

- 5 **BOSS1**: Jorgensen, W. L.; Tirado-Rives, J. Molecular modeling of organic and biomolecular systems using BOSS and MCPRO. *J. Comput. Chem.* **2005**, *26*, 1689–1700.
- 6 **BOSS2**: Jorgensen, W. L. BOSS - Biochemical and organic simulation system. *The Encyclopedia of Computational Chemistry*, P. v. R. Schleyer (editor-in-chief), John Wiley & Sons Ltd, Athens, USA, **1998**, *5*, 3281–3285.
- 7 **MAESTRO1 Schrödinger Release 2016-3**: MS Jaguar, Schrödinger, LLC, New York, NY, 2016.
- 8 **MAESTRO2**: Watts, K. S.; Dalal, P.; Murphy, R. B.; Sherman, W.; Friesner, R. A.; Shelley, J. C. ConfGen: A conformational search method for efficient generation of bioactive conformers. *J. Chem. Inf. Model.* **2010**, *50*, 534–546.
- 9 **OPLS1**: Jorgensen, W. L.; Maxwell, D. S.; Tirado-Rives, J. Development and testing of the all-atom force field on conformational energetics and properties of organic liquids. *J. Am. Chem. Soc.* **1996**, *118*, 11225–11236.
- 10 **OPLS2**: Jorgensen, W. L.; Tirado-Rives, J. The OPLS [Optimized Potentials for Liquid Simulations] potential functions for proteins, energy minimizations for crystals of cyclic peptides and crambin. *J. Am. Chem. Soc.* **1988**, *110*, 1657–1666.
- 11 **GBSA**: Jorgensen, W. L.; Ulmschneider, J. P.; Tirado-Rives, J. Free energies of hydration from a generalized born model and an all-atom force field. *Phys. Chem. B* **2004**, *108*, 16264–16270.
- 12 **AM1**: Dewar, M. J. S.; Zoebisch, E. G.; Healy, E. F.; Stewart, J. J. P. Development and use of quantum mechanical molecular models. 76. am1: a new general purpose quantum mechanical molecular model. *J. Am. Chem. Soc.* **1985**, *107*, 3902–3909.



- 13 G09:** Gaussian 09, Revision E.01, Frisch, M. J.; Trucks, G. W.; Schlegel, H. B.; Scuseria, G. E.; Robb, M. A.; Cheeseman, J. R.; Scalmani, G.; Barone, V.; Mennucci, B.; Petersson, G. A.; Nakatsuji, H.; Caricato, M.; Li, X.; Hratchian, H. P.; Izmaylov, A. F.; Bloino, J.; Zheng, G.; Sonnenberg, J. L.; Hada, M.; Ehara, M.; Toyota, K.; Fukuda, R.; Hasegawa, J.; Ishida, M.; Nakajima, T.; Honda, Y.; Kitao, O.; Nakai, H.; Vreven, T.; Montgomery, Jr., J. A.; Peralta, J. E.; Ogliaro, F.; Bearpark, M.; Heyd, J. J.; Brothers, E.; Kudin, K. N.; Staroverov, V. N.; Kobayashi, R.; Normand, J.; Raghavachari, K.; Rendell, A.; Burant, J. C.; Iyengar, S. S.; Tomasi, J.; Cossi, M.; Rega, N.; Millam, J. M.; Klene, M.; Knox, J. E.; Cross, J. B.; Bakken, V.; Adamo, C.; Jaramillo, J.; Gomperts, R.; Stratmann, R. E.; Yazyev, O.; Austin, A. J.; Cammi, R.; Pomelli, C.; Ochterski, J. W.; Martin, R. L.; Morokuma, K.; Zakrzewski, V. G.; Voth, G. A.; Salvador, P.; Dannenberg, J. J.; Dapprich, S.; Daniels, A. D.; Farkas, Ö.; Foresman, J. B.; Ortiz, J. V.; Cioslowski, J.; and Fox, D. J. Gaussian, Inc., Wallingford CT, **2009**.
- 14 MO62X:** Zhao, Y.; Truhlar, D. G. The M06 suite of density functionals for main group thermochemistry, thermochemical kinetics, noncovalent interactions, excited states, and transition elements: two new functionals and systematic testing of four m06 functionals and twelve other functionals. *Theor. Chem. Acc.* **2008**, *120*, 215–241.
- 15 SMD:** Marenich, A. V.; Cramer, C. J.; Truhlar, D. G. Universal solvation model based on solute electron density and a continuum model of the solvent defined by the bulk dielectric constant and atomic surface tensions. *J. Phys. Chem. B* **2009**, *113*, 6378–6396.
- 16 STQN:** Peng, C.; Schlegel, H. B. Combining synchronous transit and quasi-newton methods to find transition states. *Israel J. Chem.* **1993**, *33*, 449–454.
- 17 TS** Peng, C.; Ayala, P. Y.; Schlegel, H. B., Frisch, M. J. Using redundant internal coordinates to optimize equilibrium geometries and transition states. *J. Comp. Chem.* **1996**, *17*, 49–56.
